# Supplementary material
Source: publisher figshare collection journal article supplement (https://acs.figshare.com/ndownloader/files/17891264)

# Enantioselective Halolactonizations Using Amino-acid-derived Phthalazine Catalysts

Min Gan,<sup>†,‡</sup> Wei Wang,<sup>†,‡</sup> Haitao Wang,<sup>†</sup> Yuqiang Wang,<sup>†</sup> and Xiaojian Jiang<sup>\*,†</sup>

<sup>†</sup>International Cooperative Laboratory of Traditional Chinese Medicine Modernization and Innovative Drug Development of Chinese Ministry of Education (MOE), College of Pharmacy, Jinan University, Guangzhou 510632, China

<sup>‡</sup>These authors contribute equally to this work.

E-mail: chemjxj2015@jnu.edu.cn

## Table of Contents

### GENERAL METHODS

|                                                         |    |
|---------------------------------------------------------|----|
| General procedures-----                                 | S3 |
| Materials -----                                         | S3 |
| Instrumentation -----                                   | S3 |
| Table 1. Optimization of the Bromolactonization-----    | S4 |
| NMR Study of <b>1b</b> , <b>3e</b> and NBS -----        | S5 |
| Mechanistic study of 5- <i>exo</i> -cyclization-----    | S8 |
| Sulforhodamine B Assay -----                            | S8 |
| H1975 (L858R/T790M) cell IC <sub>50</sub> results ----- | S8 |
| A431 cell IC <sub>50</sub> results -----                | S9 |

### SYNTHESIS OF AMINO-ACID-DERIVED PHTHALAZINE CATALYSTS

|                                                                                               |    |
|-----------------------------------------------------------------------------------------------|----|
| Representative Procedure for the Preparation of Amino-acid-derived Phthalazine Catalyst ----- | S9 |
|-----------------------------------------------------------------------------------------------|----|

### SYNTHESIS OF DIENOIC ACID SUBSTRATES AND ASYMMETRIC HALOLACTONIZATION REACTIONS

|                                                                              |     |
|------------------------------------------------------------------------------|-----|
| Representative Procedures for the Synthesis of Dienoic Acid Substrates ----- | S12 |
| Representative Procedure for the Synthesis of Alkenoic Acid Substrates ----- | S13 |
| Representative Procedure for Asymmetric Bromolactonization -----             | S13 |
| Representative Procedure for Asymmetric Iodolactonization -----              | S13 |
| Representative Procedure for Asymmetric Chlorolactonization -----            | S14 |
| References -----                                                             | S27 |
| X-ray of <b>2c</b> -----                                                     | S28 |
| X-ray of <b>2b</b> -----                                                     | S29 |
| <sup>1</sup> H/ <sup>13</sup> C Spectra -----                                | S30 |

## GENERAL METHODS

### General Procedures

All reactions were generally performed open air or in dried glassware under an atmosphere of dry  $N_2$ . Reaction mixtures were stirred magnetically unless otherwise indicated and monitored by thin layer chromatography (TLC) on Merck precoated glass-backed silica gel 60 F-254 0.25 mm plates with visualization by fluorescence quenching at 254 nm. TLC plates were stained using potassium permanganate. Chromatography purification of products (flash column chromatography) was performed on silica gel 60 (70-230 mesh, Merck) using a forced flow of eluent at 0.3-0.5 bar. Concentration of reaction product solutions and chromatography fractions under reduced pressure was performed by rotary evaporation at 35-45°C at the appropriate pressure and then at rt, ca. 10 mmHg (vacuum pump) unless otherwise indicated.

### Materials

All chemicals, including dry solvents were purchased from Aldrich, Fluka, Acros, TCI, Merck, Strem, or Alfa Aesar and used as such unless stated otherwise. Yields given refer to chromatographically purified compounds unless otherwise demonstrated.

### Instrumentation

Melting points were determined on a Sinoinstrument melting point apparatus.  $^1H$  NMR spectra were recorded on Bruker 300 MHz or Bruker 400 MHz spectrometer.  $^{13}C$  NMR spectra were recorded on Bruker 75 MHz or Bruker 100 MHz spectrometer.  $^{13}C$  NMR chemical shifts are expressed in parts per million ( $\delta$ ) downfield from tetramethylsilane (with the central peak of  $CHCl_3$  at 77.16 ppm used as standard).  $^1H$  NMR chemical shifts are expressed in parts per million ( $\delta$ ) downfield from tetramethylsilane (with the peak of  $CHCl_3$  at 7.26 ppm used as standard; with the peak of benzene at 7.36 ppm used as standard).  $^{19}F$  NMR spectra are referenced relative to  $C_6F_6$  (with the peak of -162.85 ppm) in  $CDCl_3$ . All  $^{13}C$  spectra were measured with complete proton decoupling. NMR coupling constants (J) are reported in Hertz (Hz), and splitting patterns are indicated as follows: br, broad; s, singlet; d, doublet; dd, doublet of doublet; ddd, doublet of doublet of doublet; dt, doublet of triplet; t, triplet; q, quartet; m, multiplet. High resolution mass spectrometric measurements (HRMS) were performed by the AB SCIEX, Triple TOF 5600+. Enantiomeric excesses were determined by HPLC analysis on Shimadzu HPLC units, including the following instruments: pump, LC-16; detector, SPD-16; column, Daicel Chiralpak AD-H, OD-H or OJ-H.

**Table 1. Optimization of the Bromolactonization<sup>a</sup>**

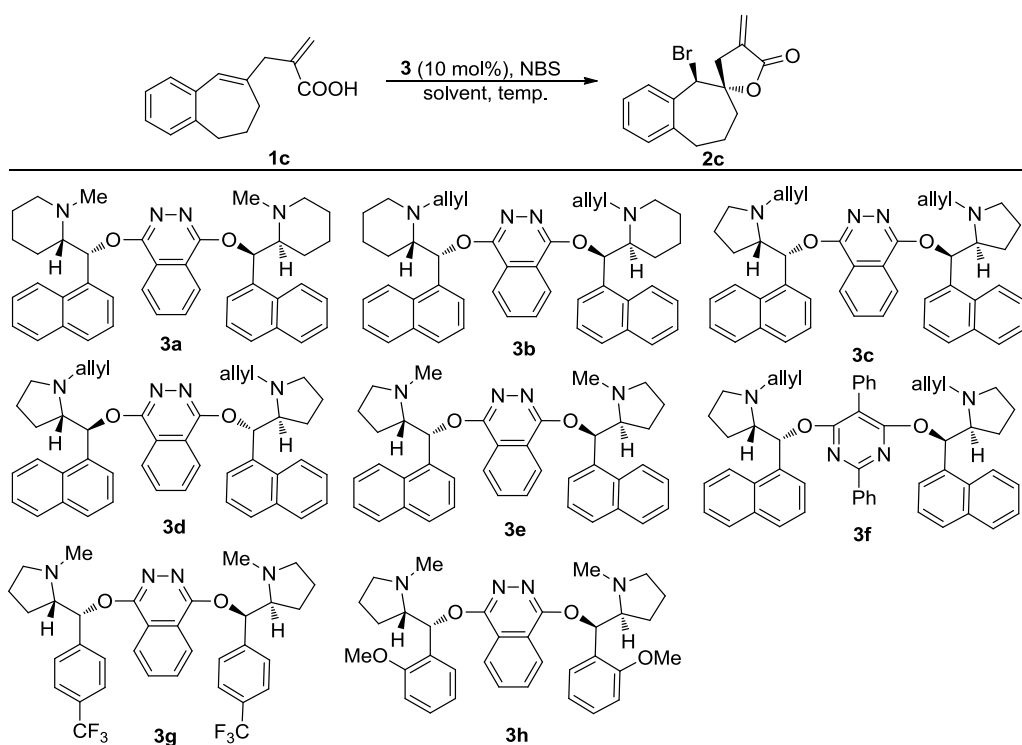

| entry           | 3  | solvent                                | temp. (°C) | Yield % (ee %) |
|-----------------|----|----------------------------------------|------------|----------------|
| 1               | 3a | toluene                                | -40        | 94 (17)        |
| 2               | 3b | toluene                                | -40        | 95 (12)        |
| 3               | 3c | toluene                                | -40        | 96 (90)        |
| 4               | 3d | toluene                                | -40        | 95 (62)        |
| 5               | 3e | toluene                                | -40        | 95 (87)        |
| 6               | 3f | toluene                                | -40        | 93 (10)        |
| 7               | 3g | toluene                                | -40        | 94 (71)        |
| 8               | 3h | toluene                                | -40        | 93 (76)        |
| 9               | 3c | toluene                                | -20        | 95 (73)        |
| 10              | 3c | toluene                                | -60        | 96 (94)        |
| 11              | 3c | <b>toluene</b>                         | <b>-78</b> | <b>97 (96)</b> |
| 12              | 3c | CH <sub>2</sub> Cl <sub>2</sub>        | -78        | 90 (82)        |
| 13 <sup>b</sup> | 3c | Hexane/CH <sub>2</sub> Cl <sub>2</sub> | -78        | 89 (85)        |
| 14 <sup>c</sup> | 3c | Hexane/ toluene                        | -78        | 90 (88)        |
| 15 <sup>d</sup> | 3c | toluene                                | -78        | 94 (92)        |
| 16 <sup>e</sup> | 3c | toluene                                | -78        | 92 (87)        |
| 17 <sup>f</sup> | 3c | toluene                                | -78        | 97 (95)        |

<sup>a</sup> Reactions were carried out with substrate **1c** (0.1 mmol), **3** (0.01 mmol), and NBS (0.12 mmol) in solvent (4 mL). The yield was isolated yield and the ee was determined by chiral HPLC. <sup>b</sup> The reaction was conducted in Hexane/CH<sub>2</sub>Cl<sub>2</sub> (1/1). <sup>c</sup> The reaction was conducted in Hexane/toluene (1/1). <sup>d</sup> BzOH (0.1 mmol) was used as additive. <sup>e</sup> NsNH<sub>2</sub> (0.1 mmol) was used as additive. <sup>f</sup> The amount of **3c** was 0.015 mmol.

## NMR study of **1b**, **3e** and NBS

Upon mixing 1:1 of **3e** and NBS in  $\text{CD}_2\text{Cl}_2$  at room temperature, the protons of  $\text{H}_a$  in **3e** shifted downfield ( $\sim 0.2$  ppm) while the methylene protons of  $\text{H}_b$  in NBS shifted upfield ( $\sim 0.3$  ppm).<sup>11</sup> Also, the  $^{13}\text{C}$ -NMR indicated that  $\text{C}_a$ ,  $\text{C}_d$  and  $\text{C}_e$  in **3e** exhibited significant upfield shift ( $0.2$ – $1.2$  ppm) while  $\text{C}_b$  in NBS exhibited a downfield shift ( $\sim 0.8$  ppm). These phenomena suggesting an interaction between the pyrrolidine and NBS as depicted in species **9** (Figure 1).<sup>12a</sup> For the  $^{13}\text{C}$ -NMR study of a mixture of **3e/1b** at a 1:1 ratio,  $\text{C}_a$  and  $\text{C}_e$  in **3e** exhibited upfield shift ( $\sim 0.5$  ppm), indicating that a proton transfer from carboxylic acid to pyrrolidine might occur (Figure 1, species **10a**). Alternatively, we observed considerable upfield shift of  $\text{C}_c$  ( $\sim 1.1$  ppm) and  $\text{C}_f$  ( $\sim 0.7$  ppm) in **3e**, indicating that proton transfer could also happen in the phthalazine moiety as shown in species **10b**.<sup>12b</sup> Also, we speculated that the positive charge of oxonium ion might lead to a downfield shift of  $\text{H}_c$ .

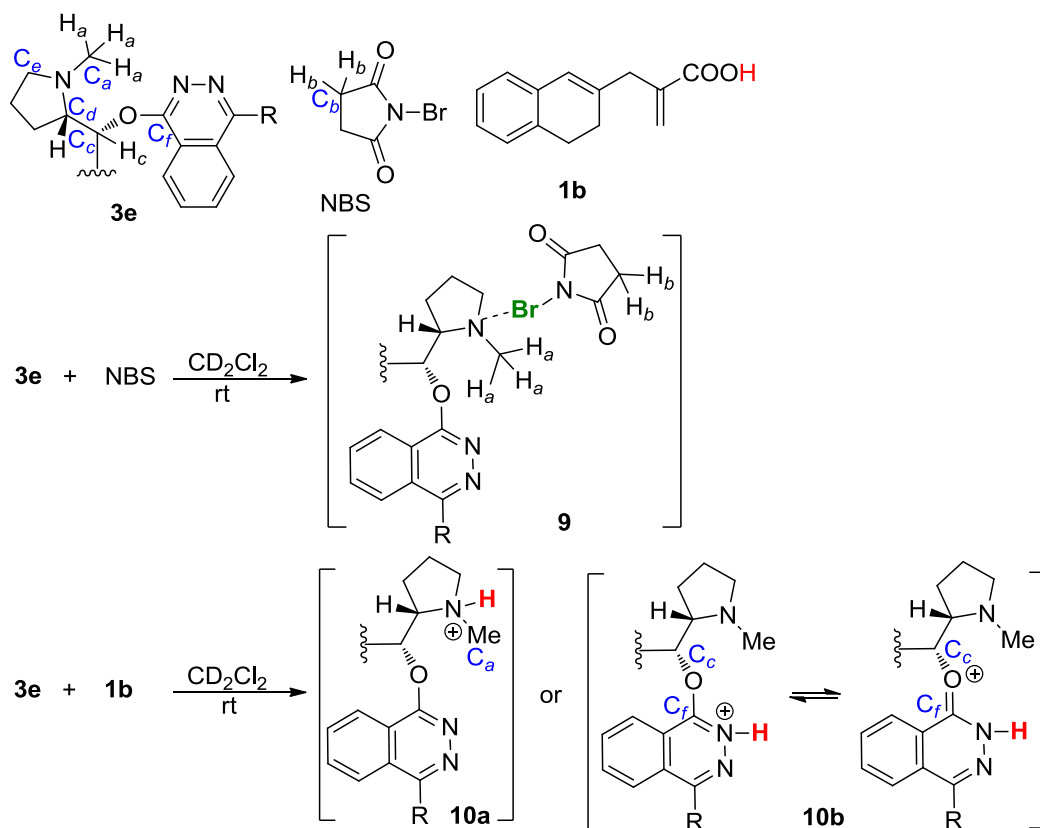

It is noteworthy to mention that hydrogen bond might display equal effect as proton transfer.

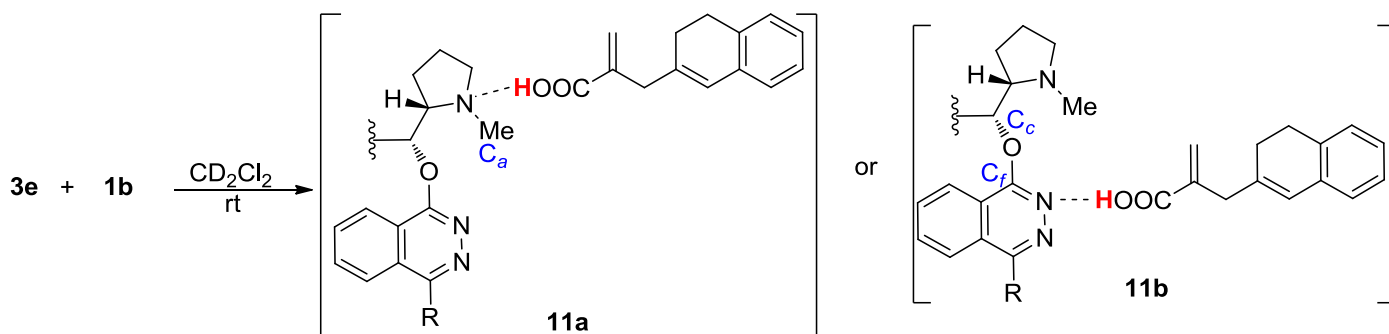

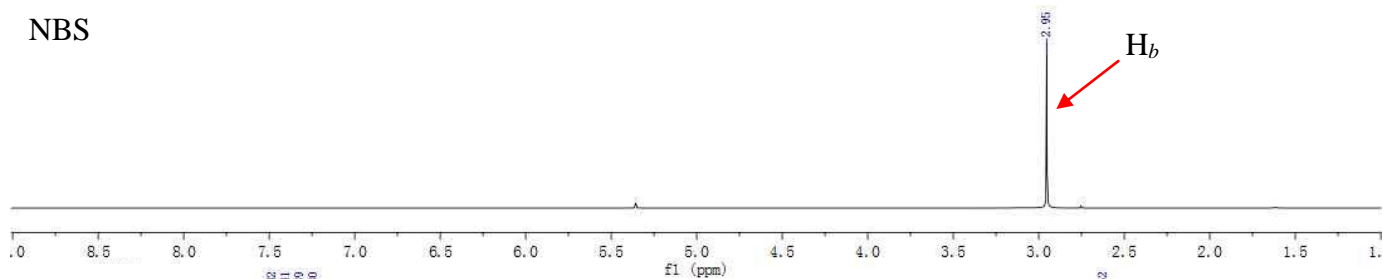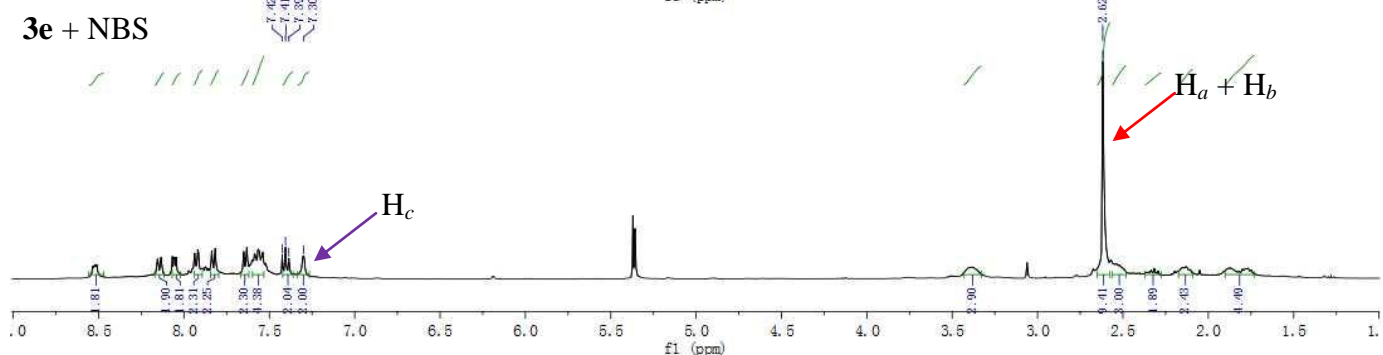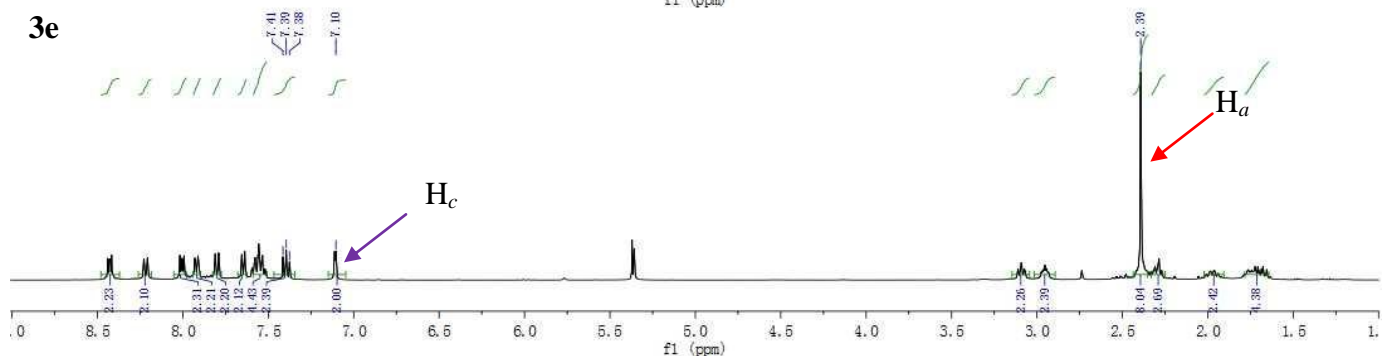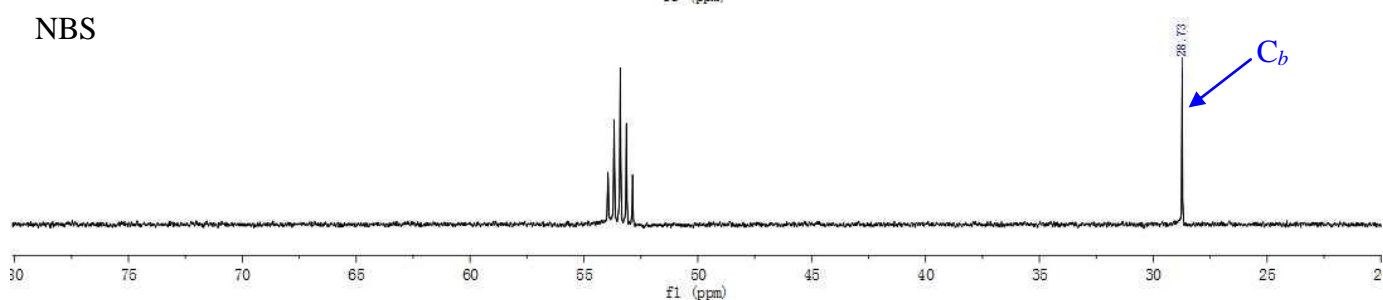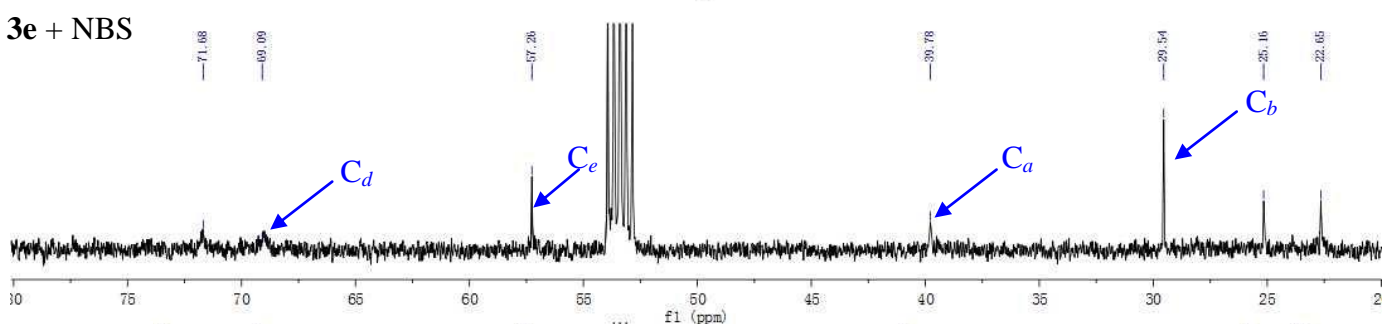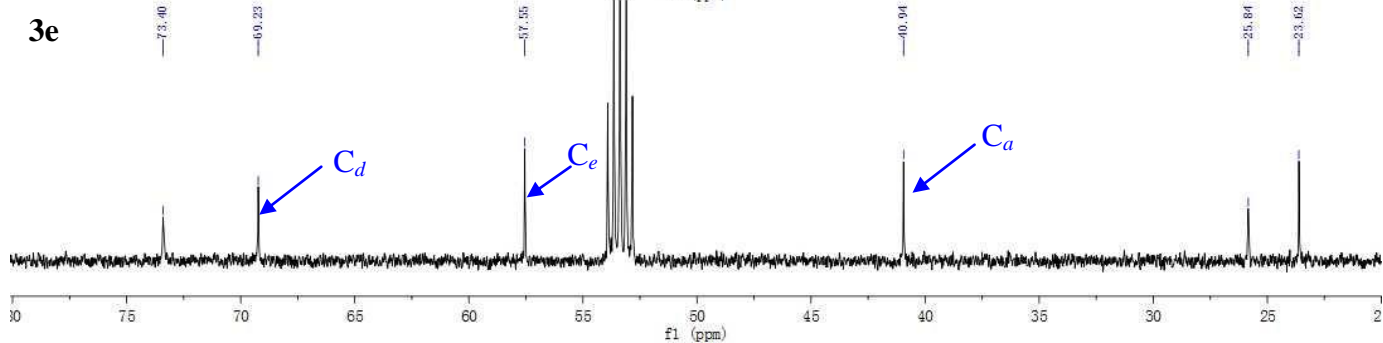

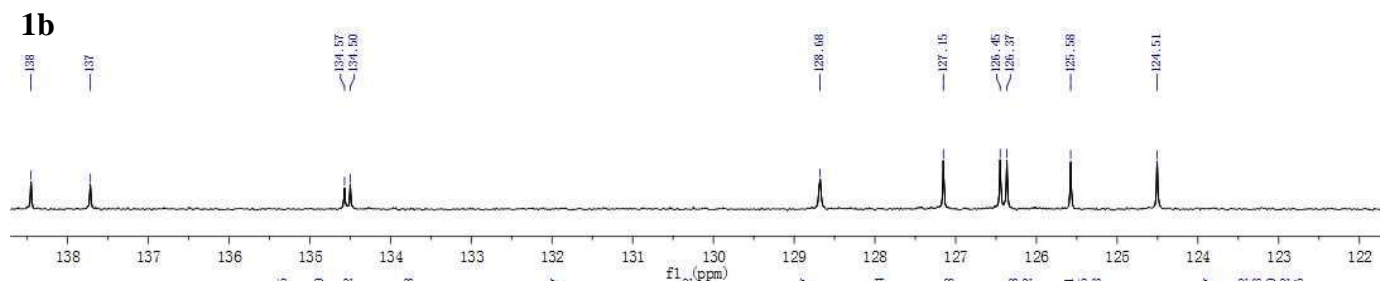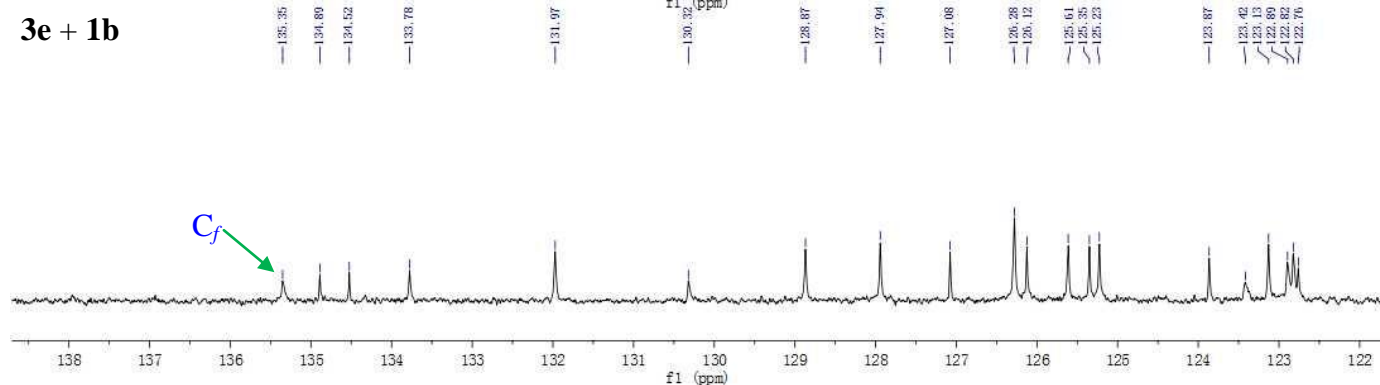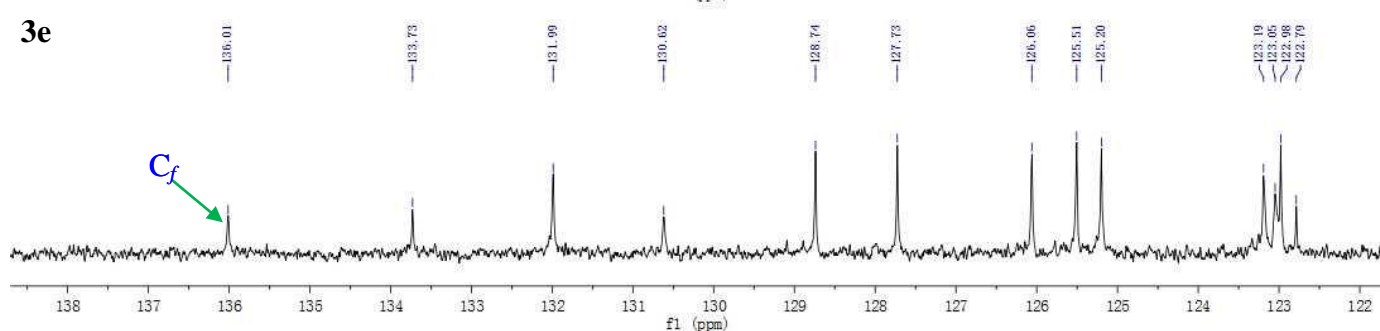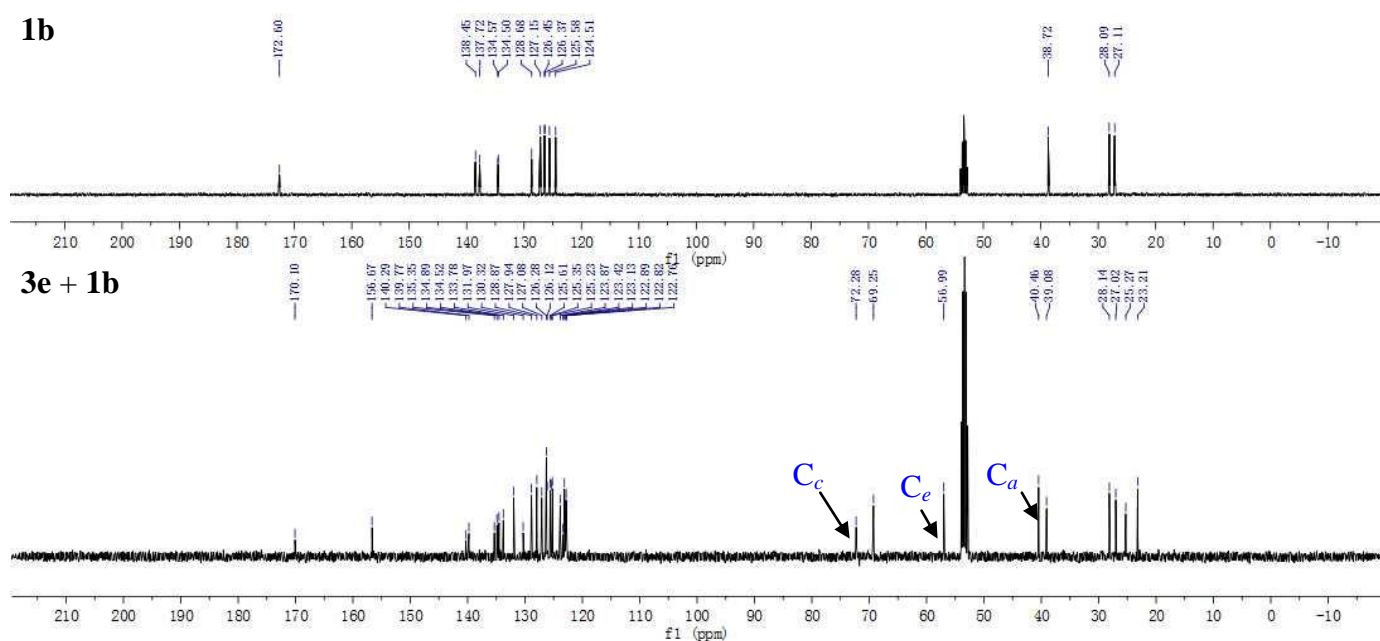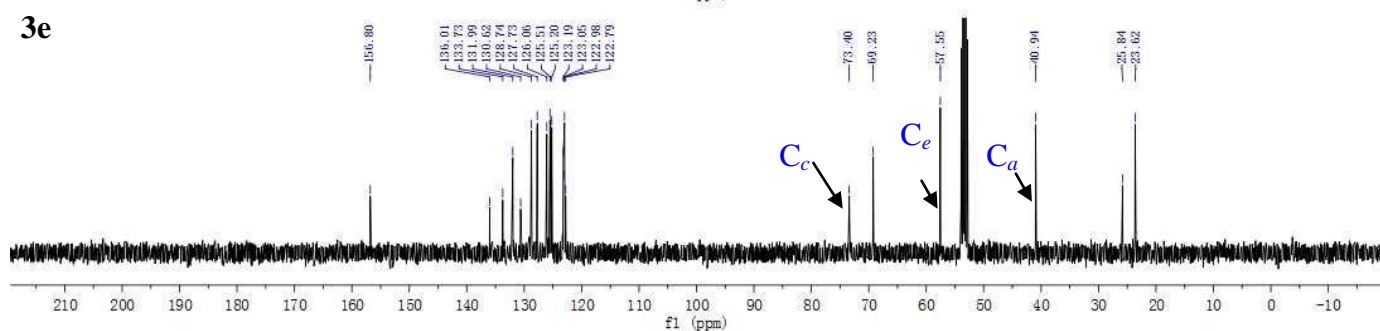

## Mechanistic study of 5-*exo*-cyclization

Theoretically, both 5-*exo*-cyclization and 6-*endo*-cyclization are possible according to the Baldwin's Rules. The high selectivity of 5-*exo*-cyclization might contribute to the more stable tertiary carbocation in transition state A, while the corresponding secondary carbocation in B was less stable. In addition, as shown in scheme the resulting product **8** which processes a *cis*-fused ring system might not be stable. Therefore, 5-*exo*-cyclization is strongly favored over 6-*endo*-cyclization, and provides the spiro halolactone **2b** exclusively.

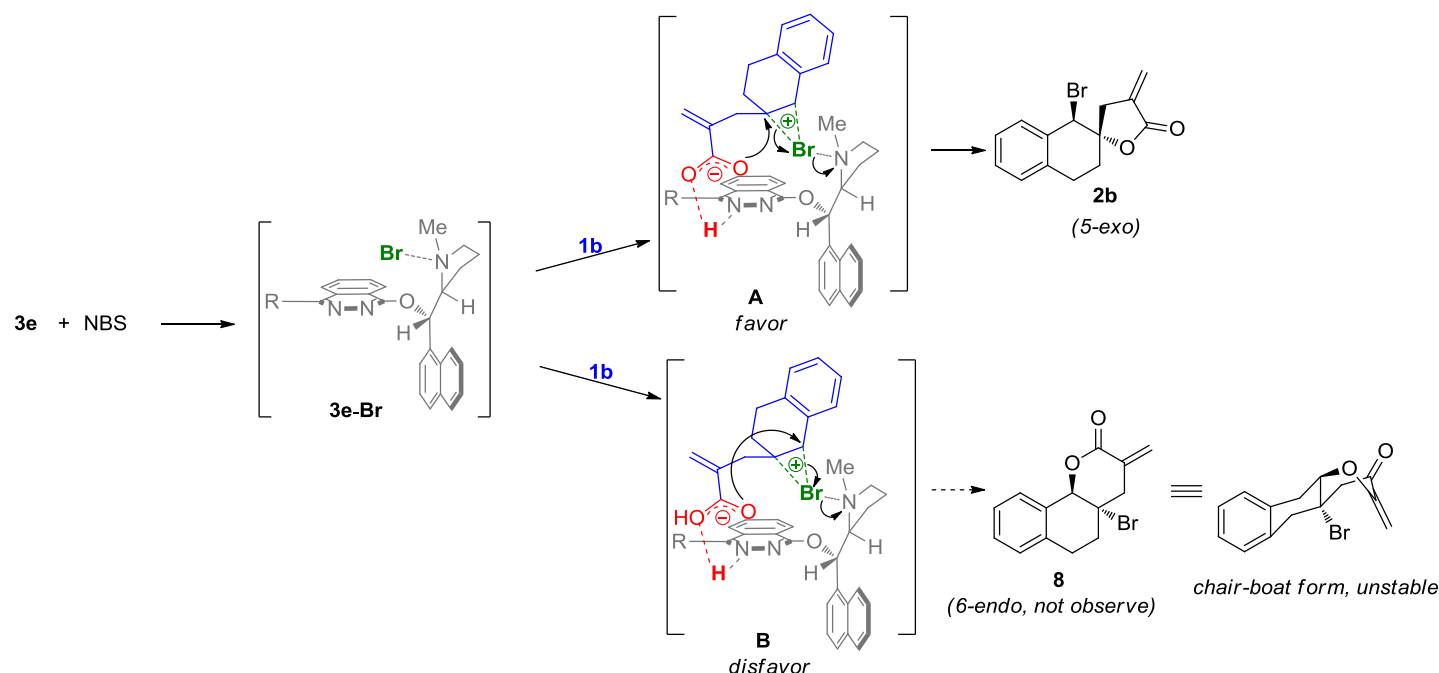

**Sulforhodamine B Assay<sup>1</sup>:** The cell proliferation of adherent cells was determined by sulforhodamine B assay (SRB). Cells were seeded in 96-well plates and then treated with different concentrations of drugs. After 72 hr of incubation, cells were fixed with 10% trichloroacetic acid for 1 hr at 4°C, washed 5 times with tap water and air-dried. Cells that survived were stained with 0.4% (w/v) sulforhodamine B (SRB) for 20 min at room temperature and washed 5 times with 1% acetic acid. Bound SRB was solubilized with 10 mM Tris and absorbance was measured at 540 nm.

| Cell code                  | Cell culture conditions                                                                                          |
|----------------------------|------------------------------------------------------------------------------------------------------------------|
| <b>H1975</b> (L858R/T790M) | Medium 1640 with 1.5 mM L-glutamine adjusted to contain 2.2 g/L sodium bicarbonate, 90%; fetal bovine serum, 10% |
| <b>A431</b>                | DMEM with 1.5 mM L-glutamine adjusted to contain 2.2 g/L sodium bicarbonate, 90%; fetal bovine serum, 10%        |

### H1975 (L858R/T790M) cell IC<sub>50</sub> results

| Compound                 | Repeat 1 (uM) | Repeat 2 (uM) | Average (uM) | SD   |
|--------------------------|---------------|---------------|--------------|------|
| <b>2a</b> ( <i>rac</i> ) | 4.87          | 5.10          | 4.98         | 0.95 |



|                                |      |      |      |      |
|--------------------------------|------|------|------|------|
| <b>2b</b> ( <i>rac</i> )       | 1.68 | 1.83 | 1.76 | 0.26 |
| <b>2c</b> ( <i>rac</i> )       | 0.80 | 1.36 | 1.08 | 0.4  |
| <b>2c</b> (96% <i>ee</i> )     | 1.2  | 1.19 | 1.2  | 0.1  |
| <b>ent-2c</b> (96% <i>ee</i> ) | 0.95 | 1.04 | 1.0  | 0.15 |
| <b>parthenolide</b>            | 1.31 | 1.54 | 1.43 | 0.16 |

#### A431 cell IC<sub>50</sub> results

| Compound                       | Repeat 1 (uM) | Repeat 2 (uM) | Average (uM) | SD   |
|--------------------------------|---------------|---------------|--------------|------|
| <b>2a</b> ( <i>rac</i> )       | 2.63          | 2.94          | 2.79         | 0.51 |
| <b>2b</b> ( <i>rac</i> )       | 4.63          | 4.81          | 4.72         | 0.8  |
| <b>2c</b> ( <i>rac</i> )       | 1.33          | 1.20          | 1.27         | 0.09 |
| <b>2c</b> (96% <i>ee</i> )     | 3.1           | 3.4           | 3.3          | 0.4  |
| <b>ent-2c</b> (96% <i>ee</i> ) | 2.2           | 2.8           | 2.5          | 0.5  |
| <b>parthenolide</b>            | 3.18          | 1.95          | 2.57         | 0.87 |

## SYNTHESIS OF AMINO-ACID-DERIVED PHTHALAZINE CATALYSTS

### Representative Procedure for the Preparation of Amino-acid-derived Phthalazine Catalyst.<sup>2</sup>

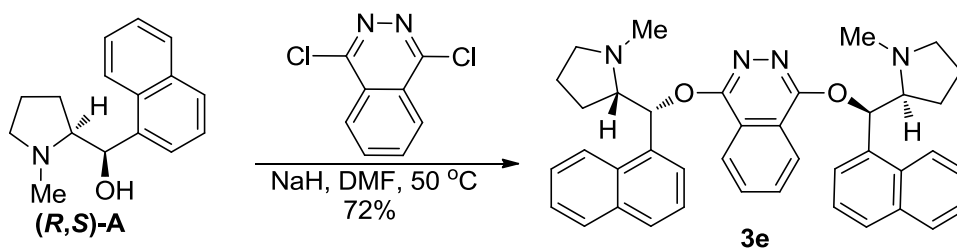

To a solution of (*R, S*)-**A**<sup>[2]</sup> (482 mg, 2 mmol, 2.0 eq) in DMF (6 mL) was added NaH (dispersion in mineral oil, 120 mg, 3 mmol) in one portion at room temperature. After stirring for 15 min, 1,4-dichlorophthalazine (239 mg, 1.2 mmol, 0.6 eq) was added to the reaction. The reaction was stirred for 24 h at 50 °C. After evaporation of DMF, the residue was purified by flash column chromatography (MeOH/EtOAc 1:10) to afford amino-acid-derived phthalazine catalyst **3e** in 72% yield.

**1,4-bis((*R*)-((*S*)-1-methylpyrrolidin-2-yl)(naphthalen-1-yl)methoxy)phthalazine, **3e****

438 mg, 72%, yellow solid; MP 90–91 °C;  $[\alpha]_D^{25} = 15.5$  (c 1.0, CHCl<sub>3</sub>); <sup>1</sup>H NMR (CDCl<sub>3</sub>, 300 MHz): δ 8.45–7.33 (m, 20H), 3.15–3.10 (m, 2H), 3.03–2.98 (m, 2H), 2.51 (s, 6H), 2.45–2.24 (m, 4H), 2.02–1.93 (m, 2H), 1.78–1.58 (m, 2H); <sup>13</sup>C NMR (CDCl<sub>3</sub>, 75 MHz): δ 156.8, 135.6, 133.8, 131.9, 130.6, 128.8, 127.9, 125.9, 125.5, 125.3, 123.5, 123.2, 123.1, 122.9; HRMS (TOF<sup>+</sup>) calcd. for C<sub>40</sub>H<sub>40</sub>N<sub>4</sub>O<sub>2</sub> [M+H]<sup>+</sup> 609.3579, found 609.3577.

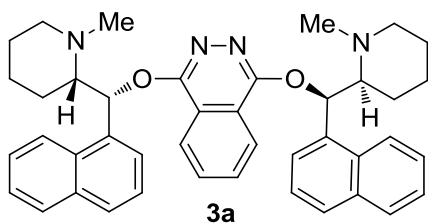

**1,4-bis((*R*)-((*S*)-1-methylpiperidin-2-yl)(naphthalen-1-yl)methoxy)phthalazine**

509 mg, 80%, yellow solid; MP 91–92 °C;  $[\alpha]_D^{25} = 15.4$  (c 1.0, CHCl<sub>3</sub>); <sup>1</sup>H NMR (CDCl<sub>3</sub>, 300 MHz): δ 8.53–7.28 (m, 20H), 3.01–2.88 (m, 3H), 2.66 (s, 6H), 2.57–2.53 (m, 2H), 2.19–2.12 (m, 2H), 2.05–1.95 (m, 1H), 1.78–1.54 (m, 6H), 1.10–0.97 (m, 2H); <sup>13</sup>C NMR (CDCl<sub>3</sub>, 75 MHz): δ 156.7, 134.9, 133.9, 132.0, 128.9, 127.9, 125.9, 125.5, 125.0, 123.8, 123.6, 123.5, 123.1, 71.7, 62.3, 58.2, 43.7, 25.8, 24.7, 24.5; HRMS (TOF<sup>+</sup>) calcd. for C<sub>42</sub>H<sub>44</sub>N<sub>4</sub>O<sub>2</sub> [M+H]<sup>+</sup> 637.5579, found 637.5590.

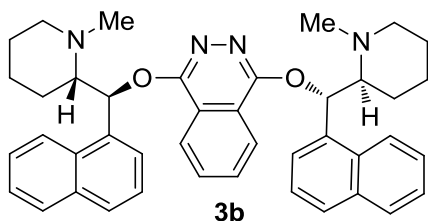

**1,4-bis((*S*)-((*S*)-1-methylpiperidin-2-yl)(naphthalen-1-yl)methoxy)phthalazine**

477 mg, 75%, yellow solid; MP 93–94 °C;  $[\alpha]_D^{25} = -36.9$  (c 1.0, CHCl<sub>3</sub>); <sup>1</sup>H NMR (CDCl<sub>3</sub>, 300 MHz): δ 8.66–7.11 (m, 20H), 3.41–3.35 (m, 2H), 2.95–2.91 (m, 2H), 2.43 (s, 6H), 2.49–2.39 (m, 2H), 1.56–1.51 (m, 6H), 1.18–1.03 (m, 6H); <sup>13</sup>C NMR (CDCl<sub>3</sub>, 75 MHz): δ 156.1, 135.7, 134.0, 131.8, 131.6, 128.7, 128.4, 127.1, 125.9, 125.4, 125.3, 123.1, 122.8, 78.4, 66.3, 55.6, 42.9, 27.3, 24.2, 23.5; HRMS (TOF<sup>+</sup>) calcd. for C<sub>42</sub>H<sub>44</sub>N<sub>4</sub>O<sub>2</sub> [M+H]<sup>+</sup> 637.5579, found 637.5584.

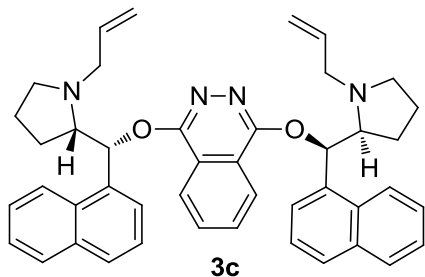

**1,4-bis((*R*)-((*S*)-1-allylpyrrolidin-2-yl)(naphthalen-1-yl)methoxy)phthalazine**

449 mg, 68%, yellow solid; MP 94-95 °C;  $[\alpha]_D^{25}=18.6$  (c 1.0, CHCl<sub>3</sub>); <sup>1</sup>H NMR (CDCl<sub>3</sub>, 300 MHz): δ 7.93-7.48 (m, 16H), 6.15-6.02 (m, 2H), 5.69 (s, broad, 2H), 5.42-5.25 (m, 4H), 3.83-3.77 (m, 2H), 3.29-3.10 (m, 6H), 2.48-2.39 (m, 2H), 1.81-1.60 (m, 8H), 1.19-1.12 (m, 2H); <sup>13</sup>C NMR (CDCl<sub>3</sub>, 75 MHz): δ 136.7, 135.6, 133.6, 130.1, 129.0, 127.4, 125.7, 125.6, 125.3, 123.3, 122.6, 117.6, 67.3, 67.1, 57.0, 54.8, 24.4, 23.4; HRMS (TOF<sup>+</sup>) calcd. for C<sub>44</sub>H<sub>44</sub>N<sub>4</sub>O<sub>2</sub> [M+H]<sup>+</sup> 661.3534, found 661.3537.

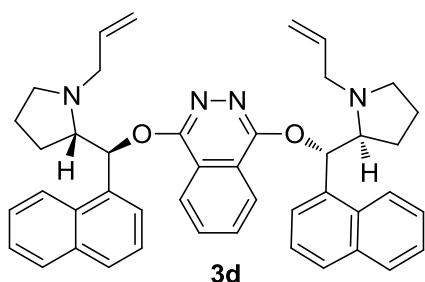

**1,4-bis((*S*)-((*S*)-1-allylpyrrolidin-2-yl)(naphthalen-1-yl)methoxy)phthalazine**

437 mg, 66%, yellow solid; MP 93-94 °C;  $[\alpha]_D^{25}= -20.7$  (c 1.0, CHCl<sub>3</sub>); <sup>1</sup>H NMR (CDCl<sub>3</sub>, 300 MHz): δ 8.58-7.09 (m, 21H), 5.81-5.68 (m, 2H), 5.00-4.92 (m, 4H), 3.65-3.59 (m, 2H), 3.40-3.33 (m, 2H), 3.15-3.10 (m, 2H), 3.00-2.92 (m, 2H), 2.45-2.36 (m, 2H), 1.82-1.61 (m, 7H); <sup>13</sup>C NMR (CDCl<sub>3</sub>, 75 MHz): δ 156.9, 136.4, 136.0, 133.9, 131.7, 131.5, 128.7, 128.1, 125.8, 125.4, 125.2, 124.8, 123.1, 122.9, 116.2, 78.7, 66.6, 59.5, 54.6, 29.0, 24.4; HRMS (TOF<sup>+</sup>) calcd. for C<sub>44</sub>H<sub>44</sub>N<sub>4</sub>O<sub>2</sub> [M+H]<sup>+</sup> 661.3534, found 661.3532.

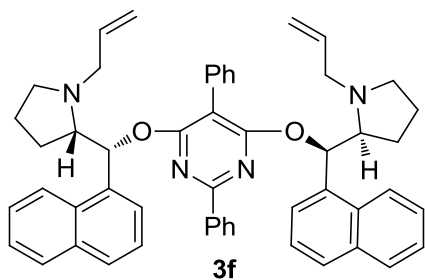

**4,6-bis((*R*)-((*S*)-1-allylpyrrolidin-2-yl)(naphthalen-1-yl)methoxy)-2,5-diphenylpyrimidine**

465.4 mg, 61%, yellow solid; MP 149-150 °C;  $[\alpha]_D^{25}= 17.4$  (c 1.0, CHCl<sub>3</sub>); <sup>1</sup>H NMR (CDCl<sub>3</sub>, 300 MHz): δ 8.39-7.09 (m, 26H), 5.73-5.60 (m, 2H), 5.05-4.95 (m, 4H), 3.25-3.19 (m, 4H), 3.08-3.04 (m, 2H), 2.95-2.88 (m, 2H), 2.40-2.32 (m, 2H), 2.11-2.04 (m, 2H), 1.75-1.59 (m, 6H); <sup>13</sup>C NMR (CDCl<sub>3</sub>, 75 MHz): δ 159.8, 153.5, 130.2, 129.3, 126.6, 124.0, 123.9, 122.9, 121.7, 120.9, 120.7, 120.6, 120.2, 118.6, 118.3, 118.2, 117.4, 116.8, 109.2, 97.5, 68.7, 59.7, 50.8, 47.5, 19.7, 16.3; HRMS (TOF<sup>+</sup>) calcd. for C<sub>52</sub>H<sub>50</sub>N<sub>4</sub>O<sub>2</sub> [M+H]<sup>+</sup> 763.4007, found 763.4039.

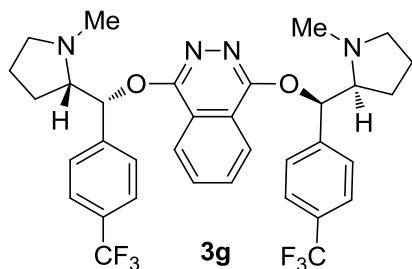

**1,4-bis((*R*)-((*S*)-1-methylpyrrolidin-2-yl)(4-(trifluoromethyl)phenyl)methoxy)phthalazine**

405 mg, 63%, yellow solid; MP 86-87 °C;  $[\alpha]_D^{25} = 24.9$  (c 1.0, CHCl<sub>3</sub>); <sup>1</sup>H NMR (CDCl<sub>3</sub>, 300 MHz): δ 8.32-6.51 (m, 14H), 3.12-3.06 (m, 2H), 2.36 (s, 6H), 2.33-2.26 (m, 2H), 2.22-2.15 (m, 2H), 1.88-1.72 (m, 6H); <sup>13</sup>C NMR (CDCl<sub>3</sub>, 75 MHz): δ 156.8, 143.8, 132.1, 129.8, 129.3, 127.0, 125.2 (q, *J* = 3.8 Hz), 123.1, 122.8, 76.1, 70.6, 57.5, 41.6, 25.9, 23.5; HRMS (TOF<sup>+</sup>) calcd. for C<sub>34</sub>H<sub>34</sub>F<sub>6</sub>N<sub>4</sub>O<sub>2</sub> [M+H]<sup>+</sup> 645.3755, found 645.3764.

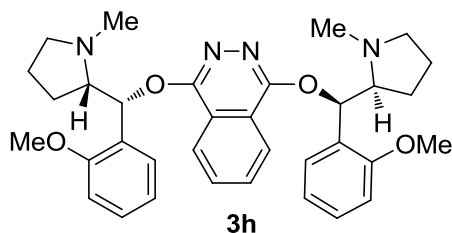

**1,4-bis((*R*)-((*S*)-1-methylpyrrolidin-2-yl)methoxy)phthalazine**

364 mg, 64%, yellow solid; MP 82-83 °C;  $[\alpha]_D^{25} = 25.8$  (c 1.0, CHCl<sub>3</sub>); <sup>1</sup>H NMR (CDCl<sub>3</sub>, 300 MHz): δ 8.39-6.72 (m, 14H), 3.90 (s, 6H), 3.15-3.12 (m, 2H), 3.35-3.33 (m, 2H), 2.26 (s, 6H), 1.88-1.63 (m, 8H); <sup>13</sup>C NMR (CDCl<sub>3</sub>, 75 MHz): δ 156.9, 156.6, 131.6, 128.6, 128.2, 127.2, 123.2, 122.8, 120.4, 110.7, 74.9, 68.4, 58.6, 55.6, 43.6, 28.3, 24.1; HRMS (TOF<sup>+</sup>) calcd. for C<sub>34</sub>H<sub>40</sub>N<sub>4</sub>O<sub>4</sub> [M+H]<sup>+</sup> 569.6761, found 569.6759.

**SYNTHESIS OF DIENOIC ACID SUBSTRATES AND ASYMMETRIC HALOLACTONIZATION REACTIONS**

**Representative Procedure for the Synthesis of Dienoic Acid Substrate.<sup>3</sup>**

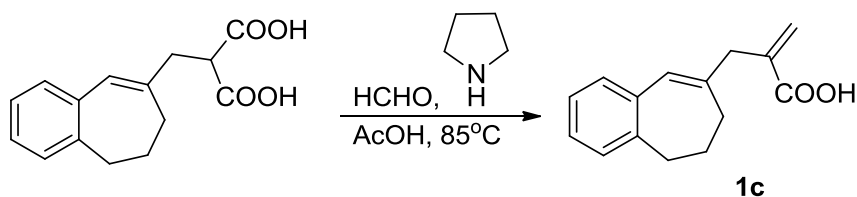

Prepared from the di-acid according to the reported procedure.<sup>3</sup> To a solution of di-acid (780 mg, 3.0 mmol, 1.0 eq.) in acetic acid (6 mL) was added pyrrolidine (0.1 mL, 1.2 mmol, 0.4 eq.) and formaldehyde solution (36.5-38% in H<sub>2</sub>O, 1 mL, 13.2 mmol, 4.4 eq.) at room temperature. The mixture was then stirred for 24 h at 85°C. After evaporation of acetic acid, water and EtOAc were added. The organic layer was washed with water, and dried over magnesium sulfate. Concentration of the organic layer offered the crude product that was further purified by flash column chromatography (hexane/EtOAc) to give the corresponding enoic acid **1c** 478.9 mg, 70%, <sup>1</sup>H NMR (CDCl<sub>3</sub>, 300 MHz): δ 7.24-7.17 (m, 4H), 6.52 (s, 1H), 6.44 (s, 1H), 5.85 (s, 1H), 3.28 (s, 2H), 2.87-2.84 (m, 2H), 2.39 (t, *J* = 8.0 Hz, 2H), 2.11-2.05 (m, 2H); <sup>13</sup>C NMR (CDCl<sub>3</sub>, 75 MHz): δ 173.0, 141.3, 140.5, 138.7, 136.5, 130.5, 129.0, 128.6, 126.4, 126.0, 41.8, 35.5, 34.3, 28.3.

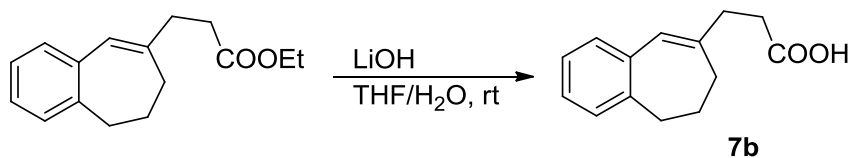

### Representative Procedure for the Synthesis of Alkenoic Acid Substrates.<sup>4</sup>

Prepared from the ester according to the reported procedure.<sup>4</sup> To a solution of ester (244 mg, 1.0 mmol, 1.0 eq.) in THF/H<sub>2</sub>O (v/v = 1:1, 4 mL) was added LiOH (2.0 mmol, 2 eq.) at room temperature. The mixture was then stirred for 24 h. After evaporation of THF, HCl (1M, 3 mL), water and EtOAc were added. The organic layer was washed with water, and dried over magnesium sulfate. Concentration of the organic layer offered the crude product that was further purified by flash column chromatography (hexane/EtOAc) to give the corresponding alkenoic acid **7b** 194.4 mg, 90%, white solid; MP 120-121 °C; <sup>1</sup>H NMR (CDCl<sub>3</sub>, 400 MHz): δ 7.18-7.13 (m, 4H), 6.36 (s, 1H), 2.79-2.55 (m, 6H), 2.31 (t, *J* = 8.0 Hz, 2H), 2.09-2.05 (m, 2H); <sup>13</sup>C NMR (CDCl<sub>3</sub>, 100 MHz): δ 179.5, 141.8, 141.2, 136.7, 130.2, 128.9, 126.8, 126.3, 125.9, 35.2, 34.9, 33.7, 33.6, 28.8; HRMS (TOF<sup>+</sup>) calcd. for C<sub>14</sub>H<sub>16</sub>O<sub>2</sub> [M-H]<sup>+</sup> 215.7044, found 215.7043.

### Representative Procedure for Asymmetric Bromolactonization.

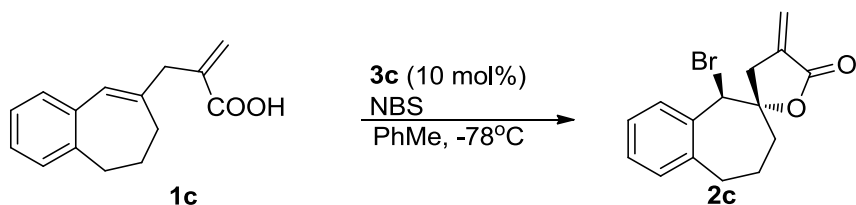

To a PhMe (4 mL) solution of dienoic acid **1c** (22.8 mg, 0.1 mmol, 1.0 equiv), and catalyst **3c** (6.7 mg, 0.01 mmol, 0.1 equiv), at -78 °C, in dark under nitrogen was added NBS (21.2 mg, 0.12 mmol, 1.2 equiv). The resulting mixture was stirred at -78 °C and monitored by TLC. The reaction was quenched with saturated Na<sub>2</sub>SO<sub>3</sub> (1 mL) at -78 °C and then was warm to room temperature. The solution was diluted with water (3 mL) and extracted with EtOAc, dried over MgSO<sub>4</sub> and concentrated in vacuo. The residue was purified by flash column chromatography (hexane/EtOAc) to yield the corresponding lactone **2c**.

### 1 mmol scale procedure of 2c

To a PhMe (40 mL) solution of dienoic acid **1c** (228 mg, 1 mmol, 1.0 equiv), and catalyst **3c** (67 mg, 0.1 mmol, 0.1 equiv), at -78 °C, in dark under nitrogen was added NBS (212 mg, 1.2 mmol, 1.2 equiv). The resulting mixture was stirred at -78 °C and monitored by TLC. The reaction was quenched with saturated Na<sub>2</sub>SO<sub>3</sub> (10 mL) at -78 °C and then was warm to room temperature. The solution was diluted with water (30 mL) and extracted with EtOAc, dried over MgSO<sub>4</sub> and concentrated in vacuo. The residue was purified by flash column chromatography (hexane/EtOAc) to yield the corresponding lactone **2c** 302.6 mg, 99% yield.

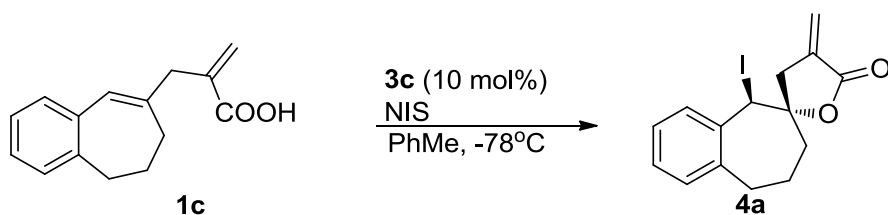

### Representative Procedure for Asymmetric Iodolactonization.

To a PhMe (4 mL) solution of dienoic acid **1c** (22.8 mg, 0.1 mmol, 1.0 equiv), and catalyst **3c** (6.7 mg, 0.01 mmol, 0.1 equiv), at  $-78\text{ }^{\circ}\text{C}$ , in dark under nitrogen was added NIS (26.9 mg, 0.12 mmol, 1.2 equiv). The resulting mixture was stirred at  $-78\text{ }^{\circ}\text{C}$  and monitored by TLC. The reaction was quenched with saturated  $\text{Na}_2\text{SO}_3$  (1 mL) at  $-78\text{ }^{\circ}\text{C}$  and then was warm to room temperature. The solution was diluted with water (3 mL) and extrated with EtOAc, dried over  $\text{MgSO}_4$  and concentrated in vacuo. The residue was purified by flash column chromatography (hexane/EtOAc) to yield the corresponding lactone **4a**.

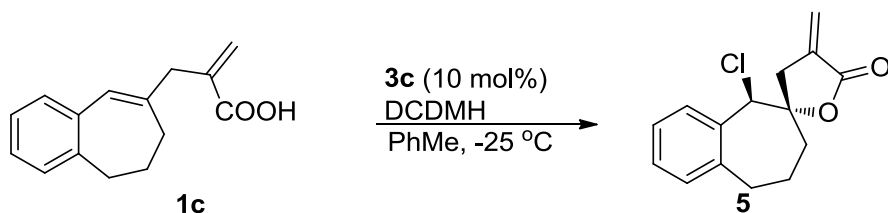

### Representative Procedure for Asymmtric Chlorolactonization.

To a PhMe (4 mL) solution of dienoic acid **1c** (22.8 mg, 0.1 mmol, 1.0 equiv), and catalyst **3c** (6.7 mg, 0.01 mmol, 0.1 equiv), at  $-25\text{ }^{\circ}\text{C}$ , in dark under nitrogen was added DCDMH (23.6 mg, 0.12 mmol, 1.2 equiv). The resulting mixture was stirred at  $-25\text{ }^{\circ}\text{C}$  and monitored by TLC. The reaction was quenched with saturated  $\text{Na}_2\text{SO}_3$  (1 mL) at  $-25\text{ }^{\circ}\text{C}$  and then was warm to room temperature. The solution was diluted with water (3 mL) and extrated with EtOAc, dried over  $\text{MgSO}_4$  and concentrated in vacuo. The residue was purified by flash column chromatography (hexane/EtOAc) to yield the corresponding lactone **4**.

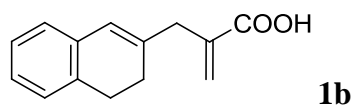

449.4 mg, 70%;  $^1\text{H}$  NMR ( $\text{CDCl}_3$ , 300 MHz):  $\delta$  7.20-7.04 (m, 4H), 6.48 (s, 1H), 6.33 (s, 1H), 5.82 (s, 1H), 3.24 (s, 2H), 2.89 (t,  $J = 8.0\text{ Hz}$ , 2H), 2.33 (t,  $J = 9.0\text{ Hz}$ , 2H);  $^{13}\text{C}$  NMR ( $\text{CDCl}_3$ , 75 MHz):  $\delta$  172.8, 138.2, 137.7, 134.5, 134.4, 128.8, 127.3, 126.6, 126.5, 125.8, 124.8, 38.8, 28.2, 27.1.

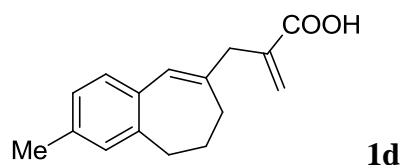

515.5 mg, 71%, white solid; MP  $131\text{--}132\text{ }^{\circ}\text{C}$ ;  $^1\text{H}$  NMR ( $\text{CDCl}_3$ , 400 MHz):  $\delta$  7.01-6.91 (m, 3H), 6.43 (s, 1H), 6.32 (s, 1H), 5.78 (s, 1H), 3.20 (s, 2H), 2.77-2.75 (m, 2H), 2.35-2.29 (m, 5H), 2.03-1.97 (m, 2H);  $^{13}\text{C}$  NMR ( $\text{CDCl}_3$ , 100 MHz):  $\delta$  171.9, 140.3, 138.6, 138.3, 136.2, 135.2, 131.2, 128.9, 128.5, 128.3, 127.0, 41.8, 34.7, 34.3, 28.3, 20.8; HRMS ( $\text{TOF}^+$ ) calcd. for  $\text{C}_{16}\text{H}_{18}\text{O}_2$   $[\text{M}+\text{H}]^+$  243.5077, found 243.5076.

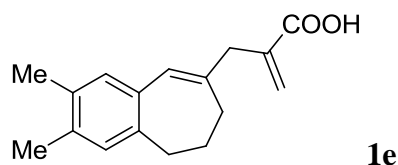

529.9 mg, 69%, white solid; MP  $139\text{--}140\text{ }^{\circ}\text{C}$ ;  $^1\text{H}$  NMR ( $\text{CDCl}_3$ , 400 MHz):  $\delta$  6.94 (s, 1H), 6.90 (s, 1H), 6.44 (s, 1H), 6.31 (s, 1H), 5.79 (s, 1H), 3.20 (s, 2H), 2.78-2.75 (m, 2H), 2.34 (t,  $J = 8.0\text{ Hz}$ , 2H), 2.25 (s, 6H), 2.03-1.97 (m, 2H);  $^{13}\text{C}$  NMR ( $\text{CDCl}_3$ , 100 MHz):  $\delta$  172.7, 139.2, 138.8, 138.7, 134.5, 133.8, 132.1, 130.5, 128.4, 128.2, 41.8, 34.9, 34.5, 28.0, 19.2, 19.0; HRMS ( $\text{TOF}^+$ ) calcd. for  $\text{C}_{17}\text{H}_{20}\text{O}_2$   $[\text{M}+\text{H}]^+$  257.2894, found 257.2895.

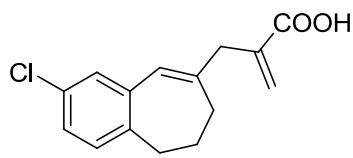

534.5 mg, 68%, yellow solid; MP 129-130 °C;  $^1\text{H}$  NMR ( $\text{CDCl}_3$ , 400 MHz):  $\delta$  7.14-7.04 (m, 3H), 6.44 (s, 1H), 6.30 (s, 1H), 5.78 (s, 1H), 3.20 (s, 2H), 2.75-2.73 (m, 2H), 2.31 (t,  $J = 8.0$  Hz, 2H), 2.03-1.97 (m, 2H);  $^{13}\text{C}$  NMR ( $\text{CDCl}_3$ , 100 MHz):  $\delta$  172.4, 143.0, 141.1, 138.3, 135.0, 131.6, 128.8, 128.7, 127.3, 125.9, 41.7, 34.9, 34.2, 28.0; HRMS (TOF $^+$ ) calcd. for  $\text{C}_{15}\text{H}_{15}\text{ClO}_2$   $[\text{M}+\text{H}]^+$  263.1962, found 263.1961.

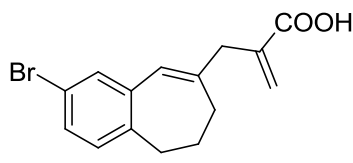

615.1 mg, 67%, yellow solid; MP 144-145 °C;  $^1\text{H}$  NMR ( $\text{CDCl}_3$ , 400 MHz):  $\delta$  7.29-6.98 (m, 3H), 6.44 (s, 1H), 6.29 (s, 1H), 5.79 (s, 1H), 3.20 (s, 2H), 2.75-2.72 (m, 2H), 2.31 (t,  $J = 8.0$  Hz, 2H), 2.03-1.97 (m, 2H);  $^{13}\text{C}$  NMR ( $\text{CDCl}_3$ , 100 MHz):  $\delta$  172.5, 143.3, 141.3, 138.3, 135.5, 131.9, 131.7, 128.8, 127.3, 119.8, 41.7, 34.8, 34.2, 28.1; HRMS (TOF $^+$ ) calcd. for  $\text{C}_{15}\text{H}_{15}\text{BrO}_2$   $[\text{M}+\text{H}]^+$  307.5022, found 307.5024.

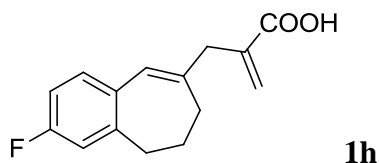

524.0 mg, 71%, yellow solid; MP 137-138 °C;  $^1\text{H}$  NMR ( $\text{CDCl}_3$ , 400 MHz):  $\delta$  7.06-6.76 (m, 3H), 6.45 (s, 1H), 6.29 (s, 1H), 5.79 (s, 1H), 3.21 (s, 2H), 2.75-2.72 (m, 2H), 2.31 (t,  $J = 8.0$  Hz, 2H), 2.03-1.97 (m, 2H);  $^{13}\text{C}$  NMR ( $\text{CDCl}_3$ , 100 MHz):  $\delta$  172.3, 162.5 (d,  $J = 244.0$  Hz), 142.1, 138.4 (d,  $J = 7.0$  Hz), 138.3, 137.0 (d,  $J = 3.0$  Hz), 130.2 (d,  $J = 8.0$  Hz), 128.7, 127.4 (d,  $J = 2.0$  Hz), 116.6 (d,  $J = 21.0$  Hz), 112.8 (d,  $J = 21.0$  Hz), 41.6, 34.2, 34.0, 28.5; HRMS (TOF $^+$ ) calcd. for  $\text{C}_{15}\text{H}_{15}\text{FO}_2$   $[\text{M}+\text{H}]^+$  247.3908, found 247.3909.

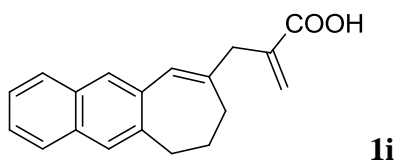

600.5 mg, 72%, white solid; MP 131-132 °C;  $^1\text{H}$  NMR ( $\text{CDCl}_3$ , 400 MHz):  $\delta$  8.05-7.37 (m, 6H), 7.04 (s, 1H), 6.53 (s, 1H), 5.91 (s, 1H), 3.47 (s, 2H), 2.79 (t,  $J = 8.0$  Hz, 2H), 2.33-2.26 (m, 2H), 2.10 (t,  $J = 8.0$  Hz, 2H);  $^{13}\text{C}$  NMR ( $\text{CDCl}_3$ , 100 MHz):  $\delta$  172.7, 142.7, 138.6, 133.8, 132.3, 131.8, 128.9, 128.2, 126.6, 125.7, 124.8, 124.6, 124.0, 40.9, 35.3, 33.2, 29.8; HRMS (TOF $^+$ ) calcd. for  $\text{C}_{19}\text{H}_{18}\text{O}_2$   $[\text{M}+\text{H}]^+$  279.6127, found 279.6128.

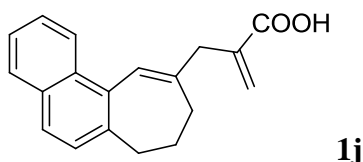

583.8 mg, 70%, white solid; MP 129-130 °C;  $^1\text{H}$  NMR ( $\text{CDCl}_3$ , 400 MHz):  $\delta$  8.16-7.27 (m, 6H), 6.59 (s, 1H), 6.49 (s, 1H), 5.86 (s, 1H), 3.35 (s, 2H), 3.20-3.17 (m, 2H), 2.32-2.18 (m, 4H);  $^{13}\text{C}$  NMR ( $\text{CDCl}_3$ , 100 MHz):  $\delta$  172.6, 142.3, 138.6, 136.9, 135.2, 132.5, 132.0, 128.9, 128.7, 128.6, 127.7, 125.9, 125.7, 124.9, 123.8, 41.2, 32.9, 32.0, 27.2; HRMS (TOF $^+$ ) calcd. for  $\text{C}_{19}\text{H}_{18}\text{O}_2$   $[\text{M}+\text{H}]^+$  279.6124, found 279.6125.

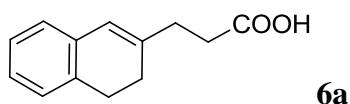

185.8 mg, 92%, white solid; MP 114-115 °C;  $^1\text{H}$  NMR ( $\text{CDCl}_3$ , 400 MHz):  $\delta$  7.18-7.04 (m, 4H), 6.30 (s, 1H), 2.89 (t,  $J$  = 8.0 Hz, 2H), 2.67-2.59 (m, 4H), 2.33 (t,  $J$  = 8.0 Hz, 2H);  $^{13}\text{C}$  NMR ( $\text{CDCl}_3$ , 100 MHz):  $\delta$  179.7, 139.6, 134.5, 134.4, 127.3, 126.5, 125.7, 122.9, 32.4, 32.0, 28.1, 27.3; HRMS (TOF $^+$ ) calcd. for  $\text{C}_{13}\text{H}_{14}\text{O}_2$   $[\text{M}-\text{H}]^+$  201.3985, found 201.3984.

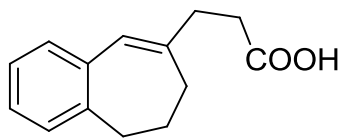

**6b**

200.8 mg, 93%, white solid; MP 120-121 °C;  $^1\text{H}$  NMR ( $\text{CDCl}_3$ , 400 MHz):  $\delta$  7.18-7.13 (m, 4H), 6.36 (s, 1H), 2.79-2.55 (m, 6H), 2.31 (t,  $J$  = 4.0 Hz, 2H), 2.09-2.05 (m, 2H);  $^{13}\text{C}$  NMR ( $\text{CDCl}_3$ , 100 MHz):  $\delta$  179.5, 141.8, 141.2, 136.7, 130.2, 128.9, 126.8, 126.3, 125.9, 35.2, 34.9, 33.7, 33.6, 28.8; HRMS (TOF $^+$ ) calcd. for  $\text{C}_{14}\text{H}_{16}\text{O}_2$   $[\text{M}-\text{H}]^+$  215.2472, found 215.2474.

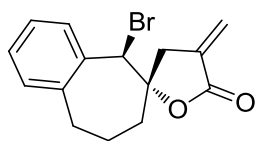

**2c**

30.3 mg, 99%; white solid; MP 138-139 °C;  $[\alpha]_D^{25}$  = -33.0 ( $c$  1.0, MeOH, 96% ee);  $^1\text{H}$  NMR ( $\text{CDCl}_3$ , 300 MHz):  $\delta$  7.26-7.13 (m, 4H), 6.33 (t,  $J$  = 3.0 Hz, 1H), 5.76 (t,  $J$  = 3.0 Hz, 1H), 4.95 (s, 1H), 3.33-2.71 (m, 5H), 2.03-1.87 (m, 3H);  $^{13}\text{C}$  NMR ( $\text{CDCl}_3$ , 75 MHz):  $\delta$  169.1, 142.9, 135.4, 134.4, 131.0, 130.8, 129.4, 126.5, 123.8, 84.5, 61.9, 42.3, 38.6, 34.5, 23.0; HPLC (Daicel Chiralcel OD-H,  $i$ -PrOH/Hexane = 10/90, 1.0 mL/min, 210 nm)  $t_1$  = 10.0 min (major),  $t_2$  = 16.4 min (minor).

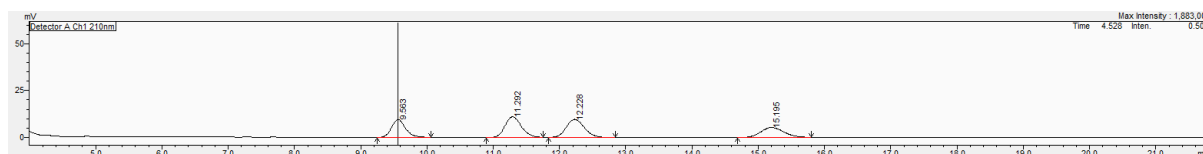

| Peak# | Ret. Time | Area   | Height | Conc.   | Area%   |
|-------|-----------|--------|--------|---------|---------|
| 1     | 9.563     | 140748 | 9466   | 21.916  | 21.916  |
| 2     | 11.292    | 187752 | 10972  | 29.234  | 29.234  |
| 3     | 12.228    | 184083 | 9683   | 28.663  | 28.663  |
| 4     | 15.195    | 129646 | 5299   | 20.187  | 20.187  |
| Total |           | 642229 | 35419  | 100.000 | 100.000 |

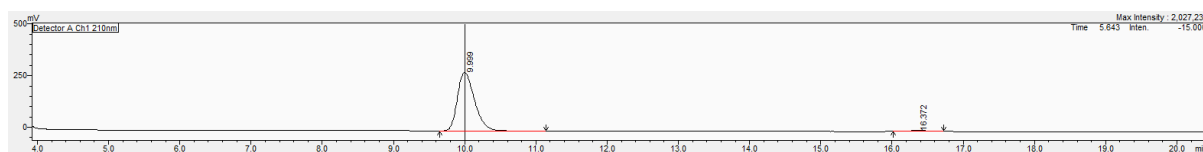

| Peak# | Ret. Time | Area    | Height | Conc.   | Area%   |
|-------|-----------|---------|--------|---------|---------|
| 1     | 9.999     | 4741793 | 283967 | 98.175  | 98.175  |
| 2     | 16.372    | 88154   | 3768   | 1.825   | 1.825   |
| Total |           | 4829946 | 287735 | 100.000 | 100.000 |

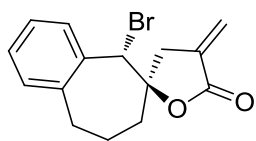

**ent-2c**

30.3 mg, 99%; colorless oil;  $[\alpha]_D^{25}$  = +33.2 ( $c$  1.0, MeOH, -96% ee); HPLC (Daicel Chiralcel OD-H,  $i$ -PrOH/Hexane = 10/90, 1.0 mL/min, 210 nm)  $t_1$  = 9.7 min (minor),  $t_2$  = 14.6 min (major).



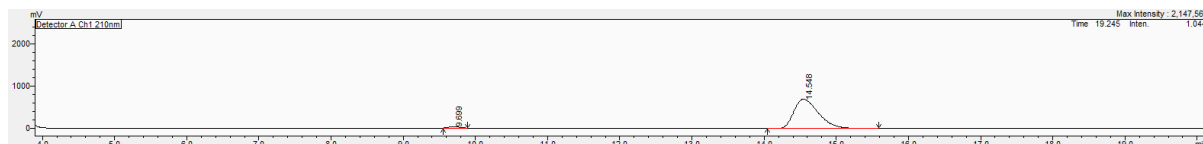

| Peak# | Ret. Time | Area     | Height | Conc.   | Area%   |
|-------|-----------|----------|--------|---------|---------|
| 1     | 9.699     | 350115   | 31677  | 2.100   | 2.100   |
| 2     | 14.548    | 16319532 | 690548 | 97.900  | 97.900  |
| Total |           | 16669647 | 722226 | 100.000 | 100.000 |

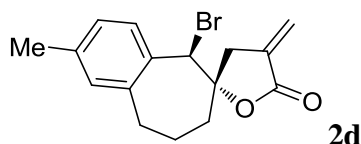

31.4 mg, 98%; yellow oil;  $[\alpha]_D^{25} = -17.0$  ( $c$  1.0, MeOH, 84% ee);  $^1\text{H}$  NMR ( $\text{CDCl}_3$ , 400 MHz):  $\delta$  7.06-6.98 (m, 3H), 6.32 (s, 1H), 5.74 (s, 1H), 4.90 (s, 1H), 3.25-2.71 (m, 5H), 2.30 (s, 3H), 2.03-1.86 (m, 3H);  $^{13}\text{C}$  NMR ( $\text{CDCl}_3$ , 100 MHz):  $\delta$  169.0, 139.9, 136.0, 135.1, 134.5, 131.7, 130.7, 130.0, 123.6, 84.5, 62.2, 42.4, 38.7, 34.1, 21.2, 20.7; HRMS ( $\text{TOF}^+$ ) calcd. for  $\text{C}_{16}\text{H}_{17}\text{BrO}_2$   $[\text{M}+\text{H}]^+$  321.4708, found 321.4709; HPLC (Daicel Chiralcel OD-H,  $i$ -PrOH/Hexane = 10/90, 1.0 mL/min, 210 nm)  $t_1$  = 6.9 min (major),  $t_2$  = 9.5 min (minor).

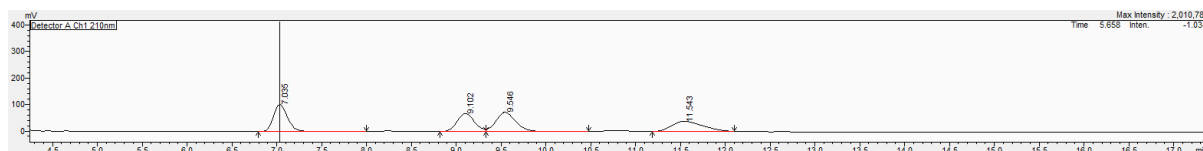

| Peak# | Ret. Time | Area    | Height | Conc.   | Area%   |
|-------|-----------|---------|--------|---------|---------|
| 1     | 7.035     | 1093580 | 101449 | 27.150  | 27.150  |
| 2     | 9.102     | 906161  | 67556  | 22.497  | 22.497  |
| 3     | 9.546     | 1108971 | 73035  | 27.532  | 27.532  |
| 4     | 11.543    | 919153  | 38531  | 22.820  | 22.820  |
| Total |           | 4027866 | 280571 | 100.000 | 100.000 |

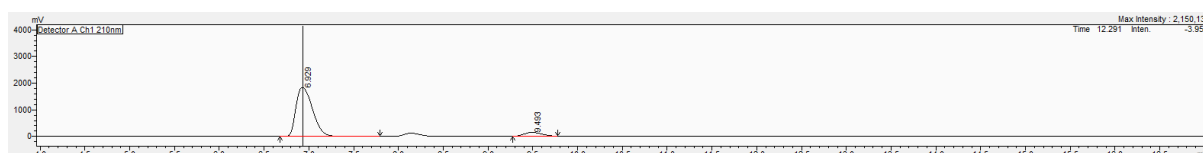

| Peak# | Ret. Time | Area     | Height  | Conc.   | Area%   |
|-------|-----------|----------|---------|---------|---------|
| 1     | 6.929     | 23414647 | 1842372 | 91.861  | 91.861  |
| 2     | 9.493     | 2074479  | 148225  | 8.139   | 8.139   |
| Total |           | 25489126 | 1990596 | 100.000 | 100.000 |

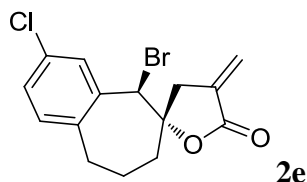

32.6 mg, 96%; yellow oil;  $[\alpha]_D^{25} = -41.0$  ( $c$  1.0, MeOH, 97% ee), dr = 90:10; the main peaks of NMR were assigned:  $^1\text{H}$  NMR ( $\text{CDCl}_3$ , 400 MHz):  $\delta$  7.16-7.11 (m, 3H), 6.33 (s, 1H), 5.76 (s, 1H), 4.90 (s, 1H), 3.29-2.73 (m, 5H), 2.03-1.89 (m, 3H);  $^{13}\text{C}$  NMR ( $\text{CDCl}_3$ , 100 MHz):  $\delta$  168.8, 144.8, 135.0, 134.1, 132.2, 130.7, 126.4, 124.0, 84.2, 60.7, 42.2, 38.4, 34.2, 22.7; HRMS ( $\text{TOF}^+$ ) calcd. for  $\text{C}_{15}\text{H}_{14}\text{ClBrO}_2$   $[\text{M}+\text{H}]^+$  341.0963, found 341.0964; HPLC (Daicel Chiralcel OD-H,  $i$ -PrOH/Hexane = 10/90,

1.0 mL/min, 210 nm)  $t_1 = 9.7$  min (major),  $t_2 = 10.8$  min (minor).

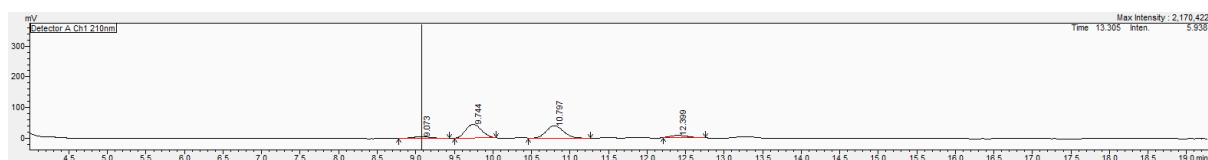

| Peak# | Ret. Time | Area    | Height | Conc.   | Area%   |
|-------|-----------|---------|--------|---------|---------|
| 1     | 9.073     | 109471  | 5940   | 7.427   | 7.427   |
| 2     | 9.744     | 640080  | 44570  | 43.428  | 43.428  |
| 3     | 10.797    | 605618  | 39603  | 41.090  | 41.090  |
| 4     | 12.399    | 118713  | 7242   | 8.054   | 8.054   |
| Total |           | 1473883 | 97355  | 100.000 | 100.000 |

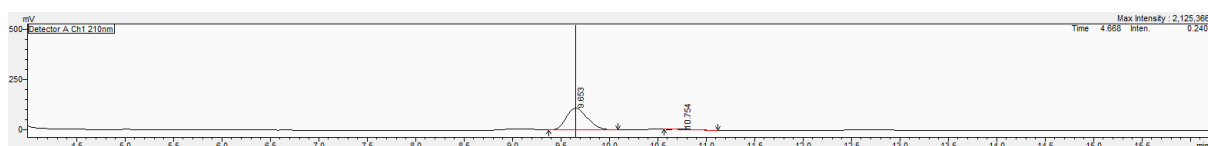

| Peak# | Ret. Time | Area    | Height | Conc.   | Area%   |
|-------|-----------|---------|--------|---------|---------|
| 1     | 9.653     | 1733285 | 110532 | 98.474  | 98.474  |
| 2     | 10.754    | 26865   | 2569   | 1.526   | 1.526   |
| Total |           | 1760151 | 113101 | 100.000 | 100.000 |

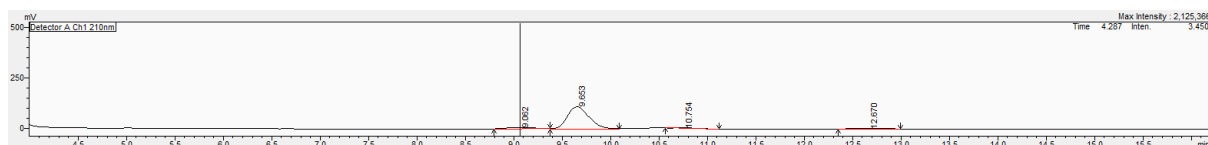

| Peak# | Ret. Time | Area    | Height | Conc.   | Area%   |
|-------|-----------|---------|--------|---------|---------|
| 1     | 9.062     | 128978  | 6941   | 6.630   | 6.630   |
| 2     | 9.653     | 1733285 | 110532 | 89.095  | 89.095  |
| 3     | 10.754    | 26865   | 2569   | 1.381   | 1.381   |
| 4     | 12.670    | 56309   | 2511   | 2.894   | 2.894   |
| Total |           | 1945439 | 122553 | 100.000 | 100.000 |

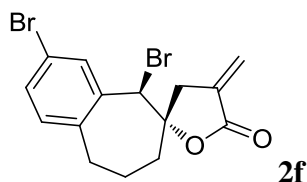

37.2 mg, 97%; yellow oil;  $[\alpha]_D^{25} = -38.5$  ( $c$  1.0, MeOH, 94% ee), dr > 99:1;  $^1\text{H}$  NMR ( $\text{CDCl}_3$ , 400 MHz):  $\delta$  7.32-7.03 (m, 3H), 6.33 (s, 1H), 5.75 (s, 1H), 4.91-4.88 (m, 1H), 3.30-2.71 (m, 5H), 2.03-1.88 (m, 3H);  $^{13}\text{C}$  NMR ( $\text{CDCl}_3$ , 100 MHz):  $\delta$  168.7, 145.0, 134.5, 134.1, 133.6, 132.4, 129.5, 123.9, 123.4, 84.1, 60.7, 42.2, 38.4, 34.2, 22.7; HRMS (TOF $^+$ ) calcd. for  $\text{C}_{15}\text{H}_{14}\text{Br}_2\text{O}_2$   $[\text{M}+\text{H}]^+$  385.1546, found 385.1547; HPLC (Daicel Chiralcel OD-H, *i*-PrOH/Hexane = 10/90, 1.0 mL/min, 210 nm)  $t_1 = 9.6$  min (major),  $t_2 = 10.9$  min (minor).

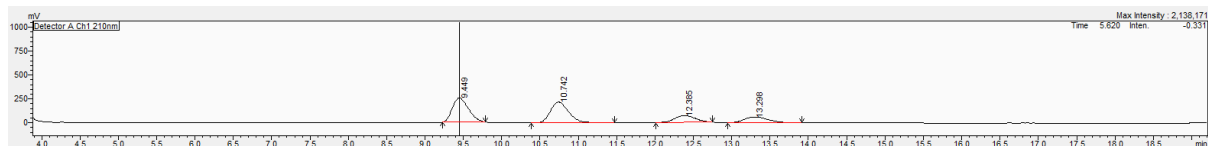

| Peak# | Ret. Time | Area    | Height | Conc.   | Area%   |
|-------|-----------|---------|--------|---------|---------|
| 1     | 9.449     | 3672324 | 252156 | 37.111  | 37.111  |
| 2     | 10.742    | 3653222 | 218000 | 36.918  | 36.918  |
| 3     | 12.385    | 1293357 | 70244  | 13.070  | 13.070  |
| 4     | 13.298    | 1276722 | 59885  | 12.902  | 12.902  |
| Total |           | 9895625 | 600285 | 100.000 | 100.000 |

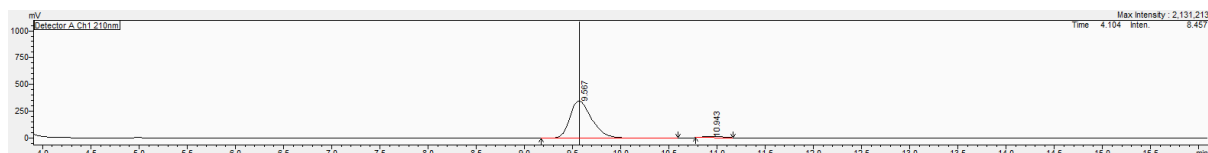

| Peak# | Ret. Time | Area    | Height | Conc.   | Area%   |
|-------|-----------|---------|--------|---------|---------|
| 1     | 9.567     | 5434597 | 343272 | 96.951  | 96.951  |
| 2     | 10.943    | 170898  | 13269  | 3.049   | 3.049   |
| Total |           | 5605495 | 356541 | 100.000 | 100.000 |

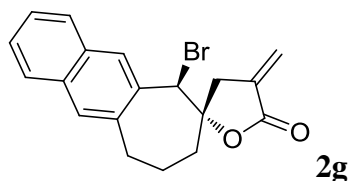

36.1 mg, 99%; white solid; MP 167-168 °C;  $[\alpha]_D^{25} = -77.5$  (*c* 1.0, MeOH, -95% ee), dr > 99:1;  $^1\text{H}$  NMR ( $\text{CDCl}_3$ , 400 MHz):  $\delta$  7.97-7.28 (m, 6H), 6.35 (s, 1H), 6.05 (s, 1H), 5.81 (s, 1H), 3.53-2.85 (m, 5H), 2.13-2.01 (m, 3H);  $^{13}\text{C}$  NMR ( $\text{CDCl}_3$ , 100 MHz):  $\delta$  168.8, 142.5, 134.4, 132.8, 132.0, 129.9, 129.7, 129.1, 127.2, 125.0, 123.8, 121.4, 84.6, 53.7, 43.2, 38.9, 35.4, 22.7; HRMS (TOF<sup>+</sup>) calcd. for  $\text{C}_{19}\text{H}_{17}\text{BrO}_2$   $[\text{M}+\text{H}]^+$  357.4826, found 357.4826; HPLC (Daicel Chiralcel OD-H, *i*-PrOH/Hexane = 10/90, 1.0 mL/min, 210 nm)  $t_1$  = 8.6 min (minor),  $t_2$  = 9.7 min (major).

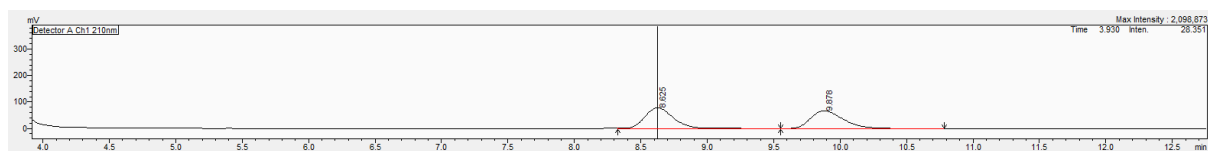

| Peak# | Ret. Time | Area    | Height | Conc.   | Area%   |
|-------|-----------|---------|--------|---------|---------|
| 1     | 8.625     | 1199062 | 78541  | 50.807  | 50.807  |
| 2     | 9.878     | 1160986 | 67658  | 49.193  | 49.193  |
| Total |           | 2360048 | 146199 | 100.000 | 100.000 |

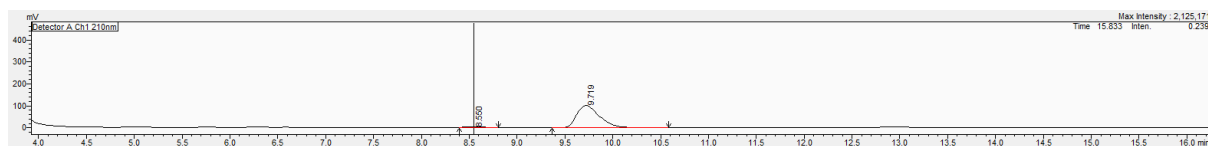

| Peak# | Ret. Time | Area    | Height | Conc.   | Area%   |
|-------|-----------|---------|--------|---------|---------|
| 1     | 8.550     | 45801   | 3788   | 2.687   | 2.687   |
| 2     | 9.719     | 1658875 | 100663 | 97.313  | 97.313  |
| Total |           | 1704676 | 104451 | 100.000 | 100.000 |

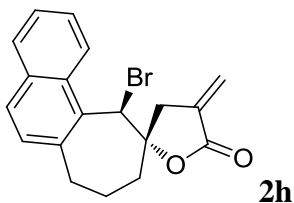

36.1 mg, 99%; yellow oil;  $[\alpha]_D^{25} = +63.0$  (*c* 1.0, MeOH, 99.8% ee), dr > 99:1;  $^1\text{H}$  NMR ( $\text{CDCl}_3$ , 400 MHz):  $\delta$  8.23-7.31 (m, 6H), 6.33 (s, 1H), 5.76 (s, 1H), 5.19 (s, 1H), 3.83-2.73 (m, 5H), 2.10-1.91 (m, 3H);  $^{13}\text{C}$  NMR ( $\text{CDCl}_3$ , 100 MHz):  $\delta$  168.8, 134.5, 134.0, 132.4, 132.0, 128.7, 128.4, 126.8, 126.4, 126.2, 123.7, 123.5, 84.3, 62.0, 41.9, 38.8, 25.6, 22.2; HRMS ( $\text{TOF}^+$ ) calcd. for  $\text{C}_{19}\text{H}_{17}\text{BrO}_2$   $[\text{M}+\text{H}]^+$  357.4826, found 357.4826; HPLC (Daicel Chiralcel OD-H, *i*-PrOH/Hexane = 10/90, 1.0 mL/min, 210 nm)  $t_1$  = 13.1 min (major),  $t_2$  = 17.7 min (minor).

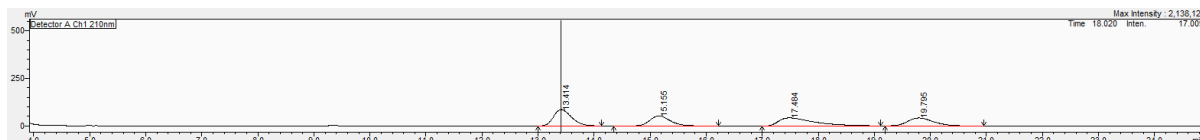

| Peak# | Ret. Time | Area    | Height | Conc.   | Area%   |
|-------|-----------|---------|--------|---------|---------|
| 1     | 13.414    | 1915035 | 86077  | 29.176  | 29.176  |
| 2     | 15.155    | 1357826 | 52711  | 20.687  | 20.687  |
| 3     | 17.484    | 1904466 | 42535  | 29.015  | 29.015  |
| 4     | 19.795    | 1386412 | 42161  | 21.122  | 21.122  |
| Total |           | 6563739 | 223484 | 100.000 | 100.000 |

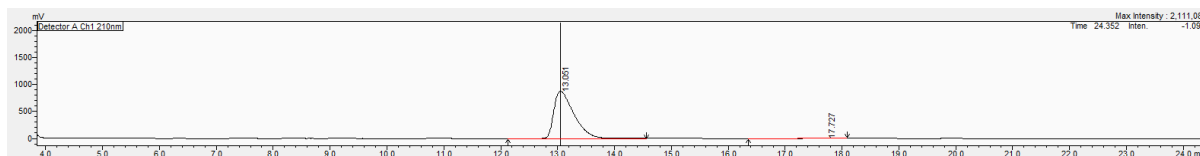

| Peak# | Ret. Time | Area     | Height | Conc.   | Area%   |
|-------|-----------|----------|--------|---------|---------|
| 1     | 13.051    | 21537111 | 880225 | 99.915  | 99.915  |
| 2     | 17.727    | 18369    | 6797   | 0.085   | 0.085   |
| Total |           | 21555480 | 887022 | 100.000 | 100.000 |

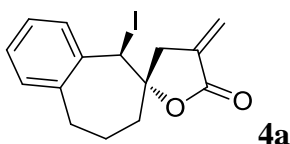

35.0 mg, 99%; yellow oil;  $[\alpha]_D^{25} = -63.5$  (*c* 1.0, MeOH, 99.6% ee);  $^1\text{H}$  NMR ( $\text{CDCl}_3$ , 400 MHz):  $\delta$  7.24-7.11 (m, 4H), 6.31 (s, 1H), 5.75 (s, 1H), 5.25 (s, 1H), 3.19-2.89 (m, 5H), 2.07-1.90 (m, 3H);  $^{13}\text{C}$  NMR ( $\text{CDCl}_3$ , 100 MHz):  $\delta$  169.1, 143.0, 137.2, 134.8, 130.9, 129.8, 129.0, 126.5, 123.6, 84.4, 43.9, 42.1, 39.7, 34.9, 22.7; HRMS ( $\text{TOF}^+$ ) calcd. for  $\text{C}_{15}\text{H}_{15}\text{IO}_2$   $[\text{M}+\text{H}]^+$  355.3910, found 355.3908; HPLC (Daicel Chiralcel OD-H, *i*-PrOH/Hexane = 10/90, 1.0 mL/min, 210 nm)  $t_1$  = 9.2 min (major),  $t_2$  = 14.4 min (minor).

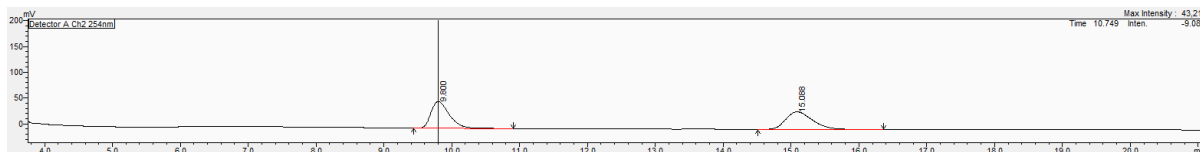

| Peak# | Ret. Time | Area    | Height | Conc.   | Area%   |
|-------|-----------|---------|--------|---------|---------|
| 1     | 9.800     | 955362  | 51624  | 50.178  | 50.178  |
| 2     | 15.088    | 948583  | 34060  | 49.822  | 49.822  |
| Total |           | 1903946 | 85684  | 100.000 | 100.000 |

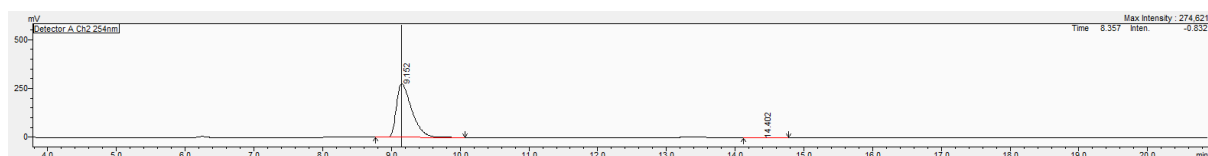

| Peak# | Ret. Time | Area    | Height | Conc.   | Area%   |
|-------|-----------|---------|--------|---------|---------|
| 1     | 9.152     | 4252146 | 275530 | 99.800  | 99.800  |
| 2     | 14.402    | 8520    | 411    | 0.200   | 0.200   |
| Total |           | 4260667 | 275941 | 100.000 | 100.000 |

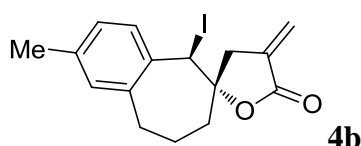

35.7 mg, 97%; yellow oil;  $[\alpha]_D^{25} = -56.0$  (c 1.0, MeOH, 92% ee);  $^1\text{H}$  NMR ( $\text{CDCl}_3$ , 400 MHz):  $\delta$  7.01-6.95 (m, 3H), 6.32 (s, 1H), 5.74 (s, 1H), 5.20 (s, 1H), 3.14-2.84 (m, 5H), 2.29 (s, 3H), 2.06-1.87 (m, 3H);  $^{13}\text{C}$  NMR ( $\text{CDCl}_3$ , 100 MHz):  $\delta$  169.2, 139.9, 137.0, 135.9, 134.9, 130.9, 130.5, 129.7, 123.4, 84.5, 43.9, 42.5, 39.7, 34.4, 22.9, 20.7; HRMS ( $\text{TOF}^+$ ) calcd. for  $\text{C}_{16}\text{H}_{17}\text{IO}_2$   $[\text{M}+\text{H}]^+$  369.4175, found 369.4176; HPLC (Daicel Chiralcel OD-H, *i*-PrOH/Hexane = 10/90, 1.0 mL/min, 210 nm)  $t_1$  = 7.0 min (major),  $t_2$  = 9.0 min (minor).

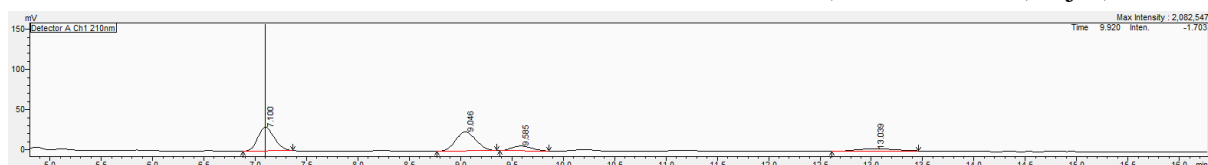

| Peak# | Ret. Time | Area   | Height | Conc.   | Area%   |
|-------|-----------|--------|--------|---------|---------|
| 1     | 7.100     | 325816 | 29276  | 40.948  | 40.948  |
| 2     | 9.046     | 318503 | 23533  | 40.029  | 40.029  |
| 3     | 9.585     | 77392  | 5859   | 9.726   | 9.726   |
| 4     | 13.039    | 73973  | 2942   | 9.297   | 9.297   |
| Total |           | 795683 | 61610  | 100.000 | 100.000 |

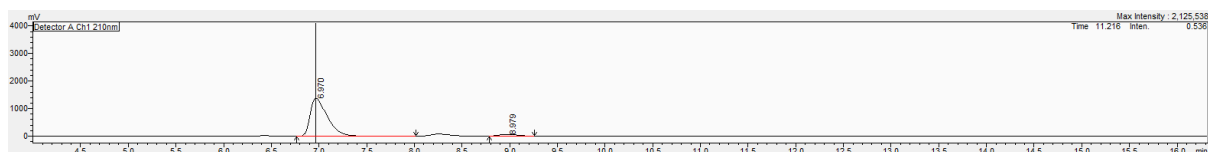

| Peak# | Ret. Time | Area     | Height  | Conc.   | Area%   |
|-------|-----------|----------|---------|---------|---------|
| 1     | 6.970     | 17336068 | 1366761 | 95.782  | 95.782  |
| 2     | 8.979     | 763507   | 58520   | 4.218   | 4.218   |
| Total |           | 18099575 | 1425281 | 100.000 | 100.000 |

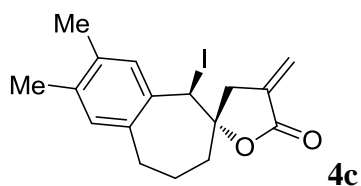

36.7 mg, 96%; yellow oil;  $[\alpha]_D^{25} = -39.5$  ( $c$  1.0, MeOH, 93% ee);  $^1\text{H}$  NMR ( $\text{CDCl}_3$ , 300 MHz):  $\delta$  6.93 (s, 1H), 6.92 (s, 1H), 6.32 (s, 1H), 5.74 (s, 1H), 4.91 (s, 1H), 3.22-2.71 (m, 5H), 2.22 (s, 3H), 2.20 (s, 3H), 2.02-1.85 (m, 3H);  $^{13}\text{C}$  NMR ( $\text{CDCl}_3$ , 75 MHz):  $\delta$  169.1, 140.2, 137.9, 134.5, 134.4, 132.6, 132.4, 132.3, 123.6, 84.6, 62.4, 42.5, 38.6, 34.0, 23.3, 19.3, 19.0; HRMS ( $\text{TOF}^+$ ) calcd. for  $\text{C}_{17}\text{H}_{19}\text{IO}_2$   $[\text{M}+\text{H}]^+$  383.2956, found 383.2957; HPLC (Daicel Chiralcel OD-H, *i*-PrOH/Hexane = 10/90, 1.0 mL/min, 210 nm)  $t_1$  = 5.9 min (major),  $t_2$  = 7.9 min (minor).

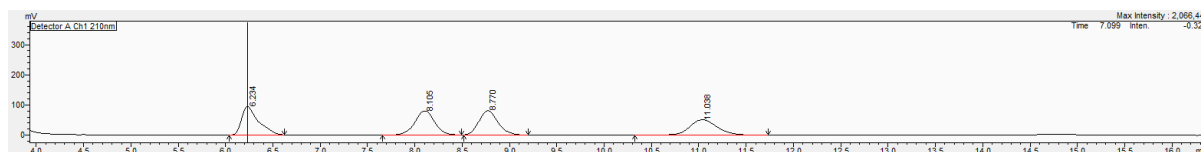

| Peak# | Ret. Time | Area    | Height | Conc.   | Area%   |
|-------|-----------|---------|--------|---------|---------|
| 1     | 6.234     | 1173132 | 93592  | 25.818  | 25.818  |
| 2     | 8.105     | 1160006 | 80022  | 25.529  | 25.529  |
| 3     | 8.770     | 1124182 | 80070  | 24.741  | 24.741  |
| 4     | 11.038    | 1086565 | 51994  | 23.913  | 23.913  |
| Total |           | 4543886 | 305678 | 100.000 | 100.000 |

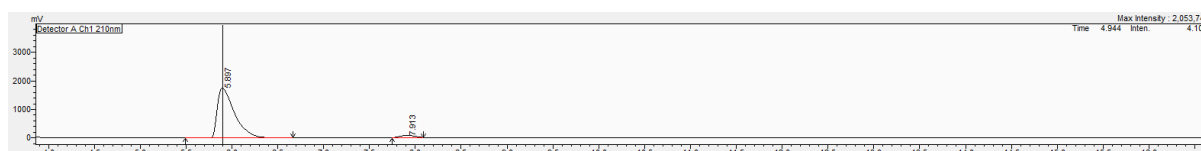

| Peak# | Ret. Time | Area     | Height  | Conc.   | Area%   |
|-------|-----------|----------|---------|---------|---------|
| 1     | 5.897     | 22653627 | 1734487 | 96.368  | 96.368  |
| 2     | 7.913     | 853709   | 78697   | 3.632   | 3.632   |
| Total |           | 23507336 | 1813184 | 100.000 | 100.000 |

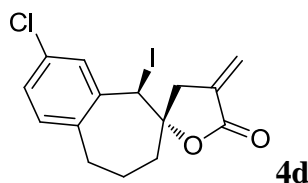

38.0 mg, 98%; yellow oil;  $[\alpha]_D^{25} = -22.0$  ( $c$  1.0, MeOH, 85% ee), dr = 91:9; the main peaks of NMR were assigned:  $^1\text{H}$  NMR ( $\text{CDCl}_3$ , 400 MHz):  $\delta$  7.18-7.06 (m, 3H), 6.32 (s, 1H), 5.75 (s, 1H), 5.19 (s, 1H), 3.16-2.84 (m, 5H), 2.07-1.93 (m, 3H);  $^{13}\text{C}$  NMR ( $\text{CDCl}_3$ , 100 MHz):  $\delta$  169.0, 144.8, 135.9, 134.5, 131.0, 130.9, 126.5, 123.9, 84.2, 43.7, 40.6, 39.5, 34.6, 22.5; HRMS ( $\text{TOF}^+$ ) calcd. for  $\text{C}_{15}\text{H}_{14}\text{ClIO}_2$   $[\text{M}+\text{H}]^+$  389.1762, found 389.1763; HPLC (Daicel Chiralcel OD-H, *i*-PrOH/Hexane = 10/90, 1.0 mL/min, 210 nm)  $t_1$  = 10.2 min (major),  $t_2$  = 11.2 min (minor).

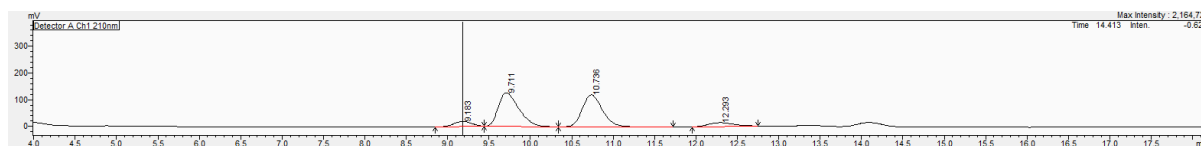

| Peak# | Ret. Time | Area    | Height | Conc.   | Area%   |
|-------|-----------|---------|--------|---------|---------|
| 1     | 9.183     | 278754  | 18556  | 5.849   | 5.849   |
| 2     | 9.711     | 2153319 | 125729 | 45.184  | 45.184  |
| 3     | 10.736    | 2036080 | 119763 | 42.724  | 42.724  |
| 4     | 12.293    | 297528  | 14351  | 6.243   | 6.243   |
| Total |           | 4765680 | 278399 | 100.000 | 100.000 |

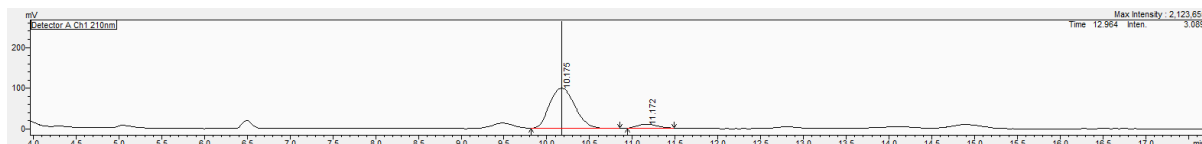

| Peak# | Ret. Time | Area    | Height | Conc.   | Area%   |
|-------|-----------|---------|--------|---------|---------|
| 1     | 10.175    | 2010247 | 98010  | 92.435  | 92.435  |
| 2     | 11.172    | 164530  | 10158  | 7.565   | 7.565   |
| Total |           | 2174778 | 108168 | 100.000 | 100.000 |

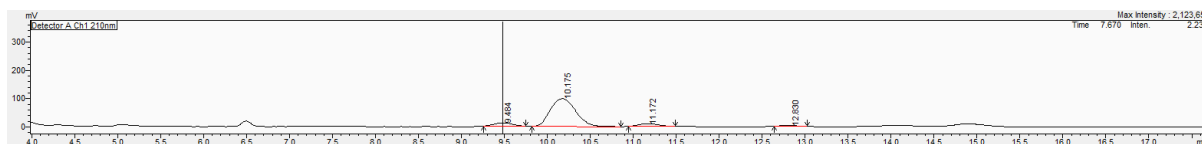

| Peak# | Ret. Time | Area    | Height | Conc.   | Area%   |
|-------|-----------|---------|--------|---------|---------|
| 1     | 9.484     | 171962  | 11568  | 7.207   | 7.207   |
| 2     | 10.175    | 2010247 | 98010  | 84.249  | 84.249  |
| 3     | 11.172    | 164530  | 10158  | 6.895   | 6.895   |
| 4     | 12.830    | 39327   | 3245   | 1.648   | 1.648   |
| Total |           | 2386067 | 122982 | 100.000 | 100.000 |

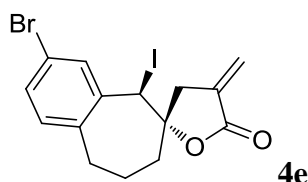

42.8 mg, 99%; yellow oil;  $[\alpha]_D^{25} = -31.5$  (c 1.0, MeOH, 80% ee), dr > 99:1;  $^1\text{H}$  NMR ( $\text{CDCl}_3$ , 400 MHz):  $\delta$  7.30-7.00 (m, 3H), 6.33 (s, 1H), 5.76 (s, 1H), 5.17 (s, 1H), 3.17-2.83 (m, 5H), 2.06-1.89 (m, 3H);  $^{13}\text{C}$  NMR ( $\text{CDCl}_3$ , 100 MHz):  $\delta$  169.0, 145.0, 136.4, 134.5, 133.8, 131.2, 129.5, 123.9, 122.9, 84.2, 43.7, 40.5, 39.5, 34.6, 22.5; HRMS ( $\text{TOF}^+$ ) calcd. for  $\text{C}_{15}\text{H}_{14}\text{BrIO}_2$   $[\text{M}+\text{H}]^+$  433.1954, found 433.1953; HPLC (Daicel Chiralcel OD-H, *i*-PrOH/Hexane = 10/90, 1.0 mL/min, 210 nm)  $t_1$  = 10.1 min (major),  $t_2$  = 11.4 min (minor).

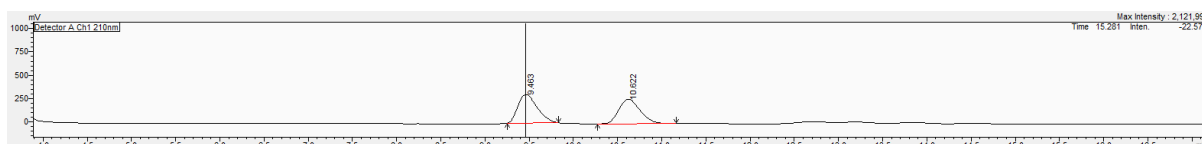

| Peak# | Ret. Time | Area    | Height | Conc.   | Area%   |
|-------|-----------|---------|--------|---------|---------|
| 1     | 9.463     | 4606928 | 304113 | 51.289  | 51.289  |
| 2     | 10.622    | 4375406 | 263347 | 48.711  | 48.711  |
| Total |           | 8982334 | 567460 | 100.000 | 100.000 |

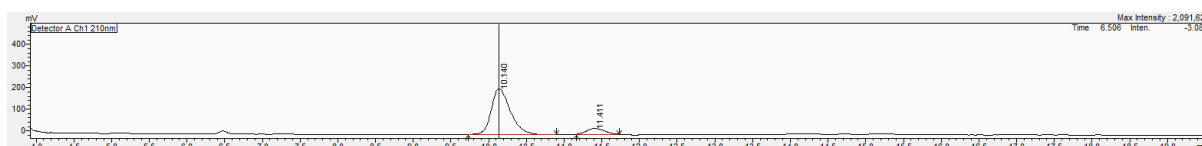

| Peak# | Ret. Time | Area    | Height | Conc.   | Area%   |
|-------|-----------|---------|--------|---------|---------|
| 1     | 10.140    | 3836267 | 213670 | 89.775  | 89.775  |
| 2     | 11.411    | 436951  | 26472  | 10.225  | 10.225  |
| Total |           | 4273218 | 240142 | 100.000 | 100.000 |

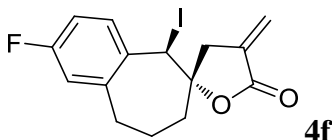

36.1 mg, 97%; yellow oil;  $[\alpha]_D^{25} = -33.0$  (*c* 1.0, MeOH, 80% ee), dr = 90:10;  $^1\text{H}$  NMR ( $\text{CDCl}_3$ , 300 MHz):  $\delta$  7.14-6.85(m, 3H), 6.34 (t, *J* = 3 Hz, 1H), 5.76 (t, *J* = 3 Hz, 1H), 5.12 (s, 1H), 3.15-2.80 (m, 5H), 2.08-1.86 (m, 3H);  $^{13}\text{C}$  NMR ( $\text{CDCl}_3$ , 75 MHz):  $\delta$  169.7, 162.4 (d, *J* = 243.8 Hz), 139.0 (d, *J* = 25.5 Hz), 134.5, 132.5 (d, *J* = 7.5 Hz), 123.9, 116.7 (d, *J* = 22.5 Hz), 115.5(d, *J* = 20.3 Hz), 84.4, 43.7, 40.2, 39.5, 34.1, 22.7; HRMS (TOF<sup>+</sup>) calcd. for  $\text{C}_{15}\text{H}_{14}\text{FIO}_2$   $[\text{M}+\text{H}]^+$  373.0840, found 373.0841; HPLC (Daicel Chiralcel OD-H, *i*-PrOH/Hexane = 10/90, 1.0 mL/min, 210 nm)  $t_1$  = 9.5 min (major),  $t_2$  = 10.9 min (minor).

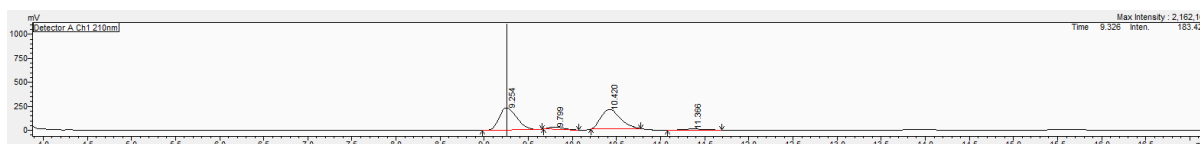

| Peak# | Ret. Time | Area    | Height | Conc.   | Area%   |
|-------|-----------|---------|--------|---------|---------|
| 1     | 9.254     | 3131874 | 229858 | 47.009  | 47.009  |
| 2     | 9.799     | 261301  | 23013  | 3.922   | 3.922   |
| 3     | 10.420    | 3049307 | 201628 | 45.770  | 45.770  |
| 4     | 11.366    | 219772  | 12082  | 3.299   | 3.299   |
| Total |           | 6662253 | 466581 | 100.000 | 100.000 |

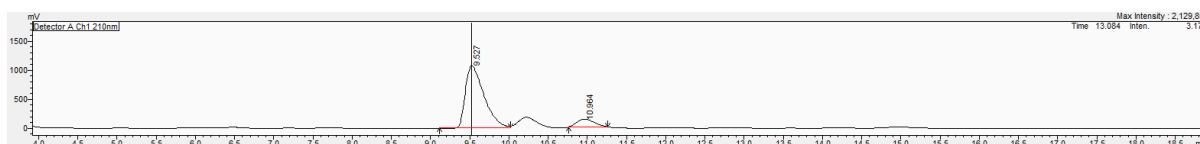

| Peak# | Ret. Time | Area     | Height  | Conc.   | Area%   |
|-------|-----------|----------|---------|---------|---------|
| 1     | 9.527     | 17740860 | 1070708 | 89.779  | 89.779  |
| 2     | 10.964    | 2019770  | 133706  | 10.221  | 10.221  |
| Total |           | 19760630 | 1204415 | 100.000 | 100.000 |

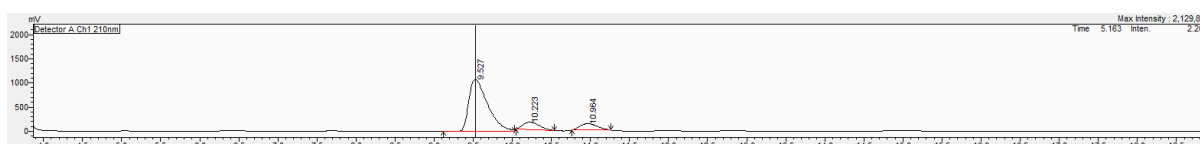

| Peak# | Ret. Time | Area     | Height  | Conc.   | Area%   |
|-------|-----------|----------|---------|---------|---------|
| 1     | 9.527     | 17740860 | 1070708 | 80.769  | 80.769  |
| 2     | 10.223    | 2204210  | 153136  | 10.035  | 10.035  |
| 3     | 10.964    | 2019770  | 133706  | 9.195   | 9.195   |
| Total |           | 21964840 | 1357551 | 100.000 | 100.000 |

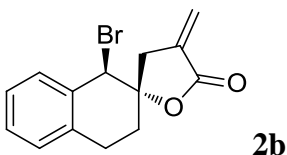

28.3 mg, 97%; white solid; MP 130-132 °C;  $[\alpha]_D^{25} = -17.5$  (*c* 1.0, MeOH, 92% ee), dr > 99:1;  $^1\text{H}$  NMR ( $\text{CDCl}_3$ , 400 MHz):  $\delta$  7.37-7.13 (m, 4H), 6.34 (s, 1H), 5.76 (s, 1H), 5.25 (s, 1H), 3.37-2.95 (m, 4H), 2.69-2.61 (m, 1H), 2.07-2.00 (m, 2H);  $^{13}\text{C}$  NMR ( $\text{CDCl}_3$ , 100 MHz):  $\delta$  169.1, 134.6, 134.5, 134.1, 130.9, 128.9, 128.8, 126.6, 123.3, 82.9, 54.8, 39.8, 29.3, 25.3; HPLC (Daicel Chiralcel IB, *i*-PrOH/Hexane = 10/90, 1.0 mL/min, 210 nm)  $t_1$  = 9.0 min (major),  $t_2$  = 10.0 min (minor).



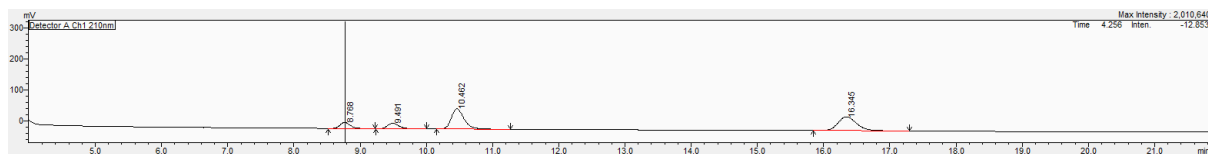

| Peak# | Ret. Time | Area    | Height | Conc.   | Area%   |
|-------|-----------|---------|--------|---------|---------|
| 1     | 8.768     | 218369  | 19856  | 9.901   | 9.901   |
| 2     | 9.491     | 222423  | 18018  | 10.085  | 10.085  |
| 3     | 10.462    | 881399  | 65287  | 39.965  | 39.965  |
| 4     | 16.345    | 883229  | 44824  | 40.048  | 40.048  |
| Total |           | 2205419 | 147984 | 100.000 | 100.000 |

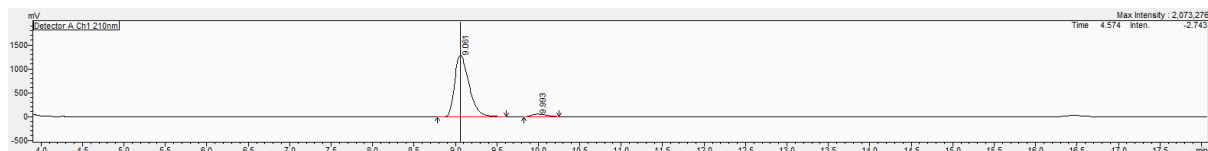

| Peak# | Ret. Time | Area     | Height  | Conc.   | Area%   |
|-------|-----------|----------|---------|---------|---------|
| 1     | 9.061     | 15518687 | 1289950 | 95.957  | 95.957  |
| 2     | 9.993     | 653855   | 54091   | 4.043   | 4.043   |
| Total |           | 16172542 | 1344041 | 100.000 | 100.000 |

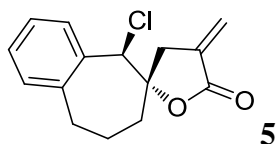

25.2 mg, 96%; yellow oil;  $[\alpha]_D^{25} = +12.0$  ( $c$  1.0, MeOH, -85% ee); dr = 60:40, the main peaks of NMR were assigned:  $^1\text{H}$  NMR ( $\text{CDCl}_3$ , 400 MHz):  $\delta$  7.32-7.14 (m, 4H), 6.63-6.31 (m, 1H), 5.74-4.88 (m, 2H), 3.29-2.52 (m, 4H), 2.09-1.88 (m, 4H);  $^{13}\text{C}$  NMR ( $\text{CDCl}_3$ , 100 MHz):  $\delta$  168.9, 130.6, 130.5, 130.1, 129.4, 129.3, 126.5, 126.4, 123.5, 84.4, 69.5, 39.1, 38.3, 34.1, 22.9; HRMS ( $\text{TOF}^+$ ) calcd. for  $\text{C}_{15}\text{H}_{15}\text{ClO}_2$   $[\text{M}+\text{H}]^+$  263.5124, found 263.5125; HPLC (Daicel Chiralcel OJ-H,  $i$ -PrOH/Hexane = 20/80, 1.0 mL/min, 210 nm)  $t_1$  = 11.4 min (minor),  $t_2$  = 16.6 min (major).

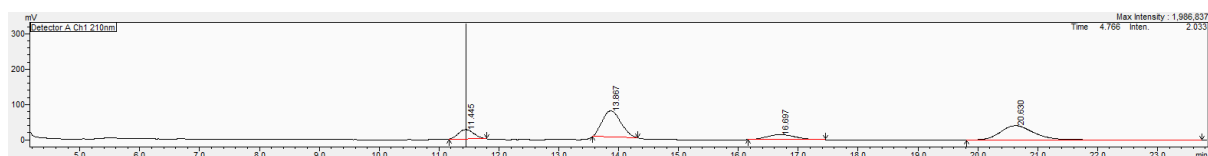

| Peak# | Ret. Time | Area    | Height | Conc.   | Area%   |
|-------|-----------|---------|--------|---------|---------|
| 1     | 11.445    | 479668  | 26524  | 11.596  | 11.596  |
| 2     | 13.867    | 1605851 | 73835  | 38.821  | 38.821  |
| 3     | 16.697    | 469819  | 14023  | 11.358  | 11.358  |
| 4     | 20.630    | 1581171 | 40381  | 38.225  | 38.225  |
| Total |           | 4136510 | 154763 | 100.000 | 100.000 |

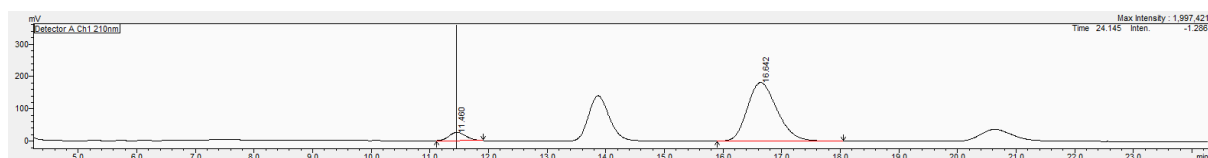

| Peak# | Ret. Time | Area    | Height | Conc.   | Area%   |
|-------|-----------|---------|--------|---------|---------|
| 1     | 11.460    | 510102  | 25806  | 7.391   | 7.391   |
| 2     | 16.642    | 6391981 | 181401 | 92.609  | 92.609  |
| Total |           | 6902083 | 207207 | 100.000 | 100.000 |

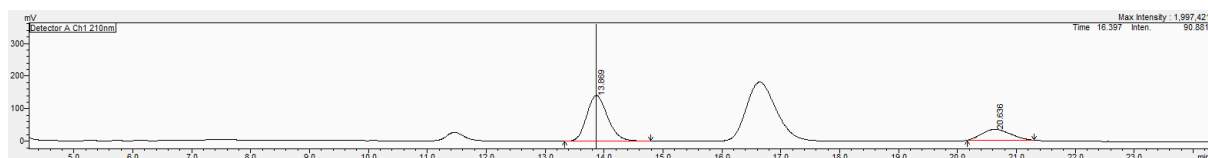

| Peak# | Ret. Time | Area    | Height | Conc.   | Area%   |
|-------|-----------|---------|--------|---------|---------|
| 1     | 13.869    | 3447807 | 140100 | 75.520  | 75.520  |
| 2     | 20.636    | 1117617 | 33236  | 24.480  | 24.480  |
| Total |           | 4565424 | 173336 | 100.000 | 100.000 |

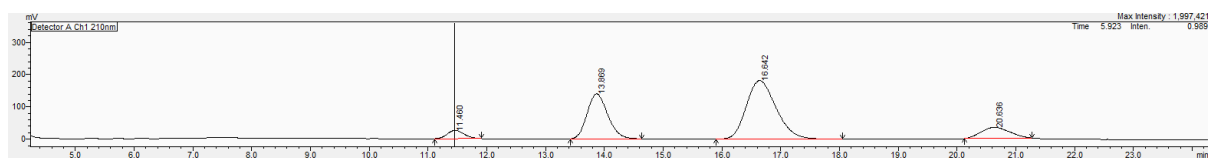

| Peak# | Ret. Time | Area     | Height | Conc.   | Area%   |
|-------|-----------|----------|--------|---------|---------|
| 1     | 11.460    | 510102   | 25806  | 4.457   | 4.457   |
| 2     | 13.869    | 3394219  | 139401 | 29.655  | 29.655  |
| 3     | 16.642    | 6391981  | 181401 | 55.845  | 55.845  |
| 4     | 20.636    | 1149573  | 33829  | 10.044  | 10.044  |
| Total |           | 11445875 | 380437 | 100.000 | 100.000 |

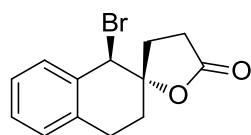

**7a**

27.2 mg, 97%; yellow oil;  $[\alpha]_D^{25} = +29.5$  ( $c$  1.0, MeOH, 97% ee), dr > 99:1;  $^1\text{H}$  NMR ( $\text{CDCl}_3$ , 400 MHz):  $\delta$  7.37-7.12 (m, 4H), 5.24 (s, 1H), 3.23-2.06 (m, 8H);  $^{13}\text{C}$  NMR ( $\text{CDCl}_3$ , 100 MHz):  $\delta$  175.9, 134.6, 134.4, 130.9, 128.9, 128.7, 126.6, 85.7, 54.8, 33.3, 28.8, 28.3, 25.3; HRMS ( $\text{TOF}^+$ ) calcd. for  $\text{C}_{13}\text{H}_{13}\text{BrO}_2$   $[\text{M}+\text{H}]^+$  281.3607, found 281.3608; HPLC (Daicel Chiralcel IB,  $i$ -PrOH/Hexane = 10/90, 1.0 mL/min, 210 nm)  $t_1$  = 12.9 min (major),  $t_2$  = 16.7 min (minor).

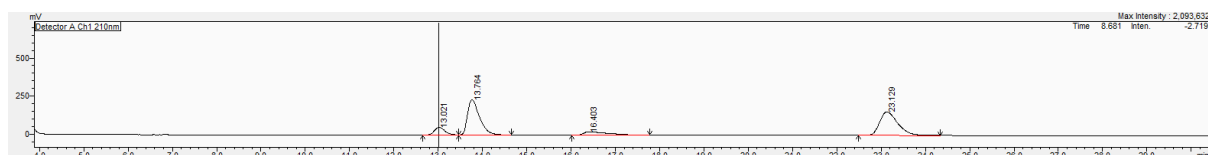

| Peak# | Ret. Time | Area     | Height | Conc.   | Area%   |
|-------|-----------|----------|--------|---------|---------|
| 1     | 13.021    | 818723   | 49856  | 7.921   | 7.921   |
| 2     | 13.764    | 4318413  | 229664 | 41.781  | 41.781  |
| 3     | 16.403    | 833617   | 22156  | 8.065   | 8.065   |
| 4     | 23.129    | 4365119  | 154030 | 42.233  | 42.233  |
| Total |           | 10335873 | 455706 | 100.000 | 100.000 |

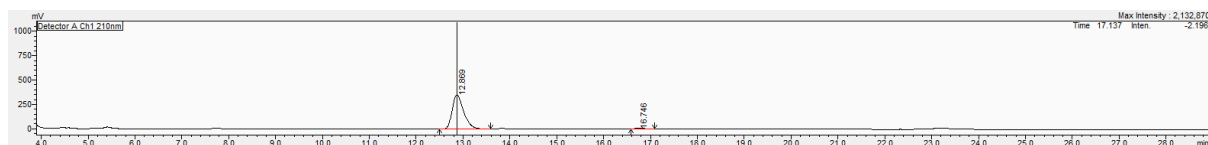

| Peak# | Ret. Time | Area    | Height | Conc.   | Area%   |
|-------|-----------|---------|--------|---------|---------|
| 1     | 12.869    | 6040497 | 352788 | 98.465  | 98.465  |
| 2     | 16.746    | 94153   | 5343   | 1.535   | 1.535   |
| Total |           | 6134651 | 358131 | 100.000 | 100.000 |

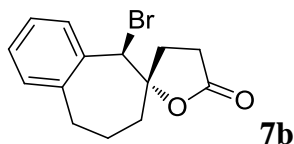

29.1 mg, 98%; yellow oil;  $[\alpha]_D^{25} = +47$  ( $c$  1.0, MeOH, 99% ee), dr > 99:1;  $^1\text{H}$  NMR ( $\text{CDCl}_3$ , 400 MHz):  $\delta$  7.26-7.13 (m, 4H), 5.00 (s, 1H), 3.30-1.81 (m, 10H);  $^{13}\text{C}$  NMR ( $\text{CDCl}_3$ , 100 MHz):  $\delta$  175.8, 142.8, 135.7, 130.9, 130.7, 129.4, 126.5, 87.4, 61.9, 37.8, 35.5, 34.6, 28.5, 23.1; HRMS ( $\text{TOF}^+$ ) calcd. for  $\text{C}_{14}\text{H}_{15}\text{BrO}_2$   $[\text{M}+\text{H}]^+$  295.3976, found 295.3975; HPLC (Daicel Chiralcel IB,  $i$ -PrOH/Hexane = 10/90, 1.0 mL/min, 210 nm)  $t_1$  = 14.4 min (minor),  $t_2$  = 14.9 min (major).

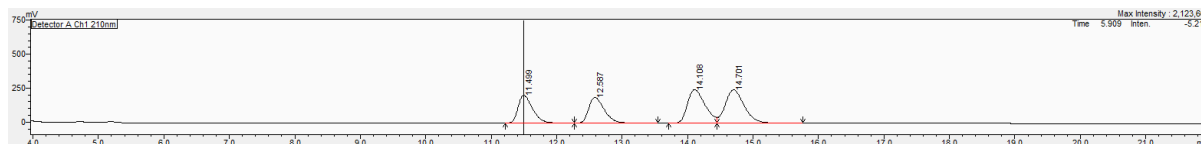

| Peak# | Ret. Time | Area     | Height | Conc.   | Area%   |
|-------|-----------|----------|--------|---------|---------|
| 1     | 11.499    | 3118443  | 204188 | 19.798  | 19.798  |
| 2     | 12.587    | 3117887  | 189135 | 19.795  | 19.795  |
| 3     | 14.108    | 4592791  | 246642 | 29.158  | 29.158  |
| 4     | 14.701    | 4922015  | 245442 | 31.249  | 31.249  |
| Total |           | 15751136 | 885406 | 100.000 | 100.000 |

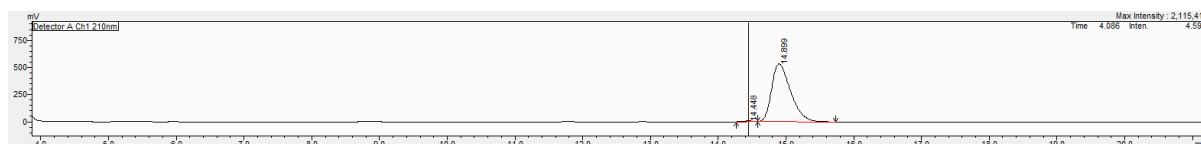

| Peak# | Ret. Time | Area     | Height | Conc.   | Area%   |
|-------|-----------|----------|--------|---------|---------|
| 1     | 14.448    | 56902    | 5034   | 0.551   | 0.551   |
| 2     | 14.899    | 10268609 | 529413 | 99.449  | 99.449  |
| Total |           | 10325511 | 534446 | 100.000 | 100.000 |

## REFERENCES

1. Quan, H.; Liu, H.; Li, C.; Lou, L. *J. Pharmacol. Exp. Ther.* **2009**, 330, 326.
2. Jiang, X.; Tan, C. K.; Zhou, L. Yeung, Y.-Y. *Angew. Chem. Int. Ed.* **2012**, 51, 7771.
3. Wang, W.; He, H.; Gan, M.; Wang, H.; Wang, Y.; Jiang, X. *Adv. Synth. Catal.* **2019**, 10.1002/adsc.201900728.
4. Zhou, L.; Tan, C. K.; Jiang, X.; Chen, F.; Yeung, Y.-Y. *J. Am. Chem. Soc.* **2010**, 132, 15474.

# X-ray of 2b

|                    |                                           |                    |
|--------------------|-------------------------------------------|--------------------|
| Bond precision:    | C-C = 0.0042 Å                            | Wavelength=0.71073 |
| Cell:              | a=9.1440(3)    b=7.0069(2)    c=9.8897(4) |                    |
|                    | alpha=90    beta=99.952(4)    gamma=90    |                    |
| Temperature: 293 K |                                           |                    |

  

|                | Calculated    | Reported      |
|----------------|---------------|---------------|
| Volume         | 624.11(4)     | 624.11(4)     |
| Space group    | P 21          | P 1 21 1      |
| Hall group     | P 2yb         | P 2yb         |
| Moiety formula | C14 H13 Br O2 | C14 H13 Br O2 |
| Sum formula    | C14 H13 Br O2 | C14 H13 Br O2 |
| Mr             | 293.14        | 293.16        |
| Dx, g cm-3     | 1.560         | 1.560         |
| Z              | 2             | 2             |
| Mu (mm-1)      | 3.280         | 3.279         |
| F000           | 296.0         | 295.6         |
| F000'          | 295.56        |               |
| h,k,lmax       | 11,8,12       | 11,8,12       |
| Nref           | 2561[ 1391]   | 2469          |
| Tmin,Tmax      | 0.330,0.362   | 0.754,1.000   |
| Tmin'          | 0.305         |               |

Correction method= # Reported T Limits: Tmin=0.754 Tmax=1.000  
AbsCorr = MULTI-SCAN  
Data completeness= 1.77/0.96    Theta(max)= 26.350  
R(reflections)= 0.0270( 2238)    wR2(reflections)= 0.0523( 2469)  
S = 1.055    Npar= 162

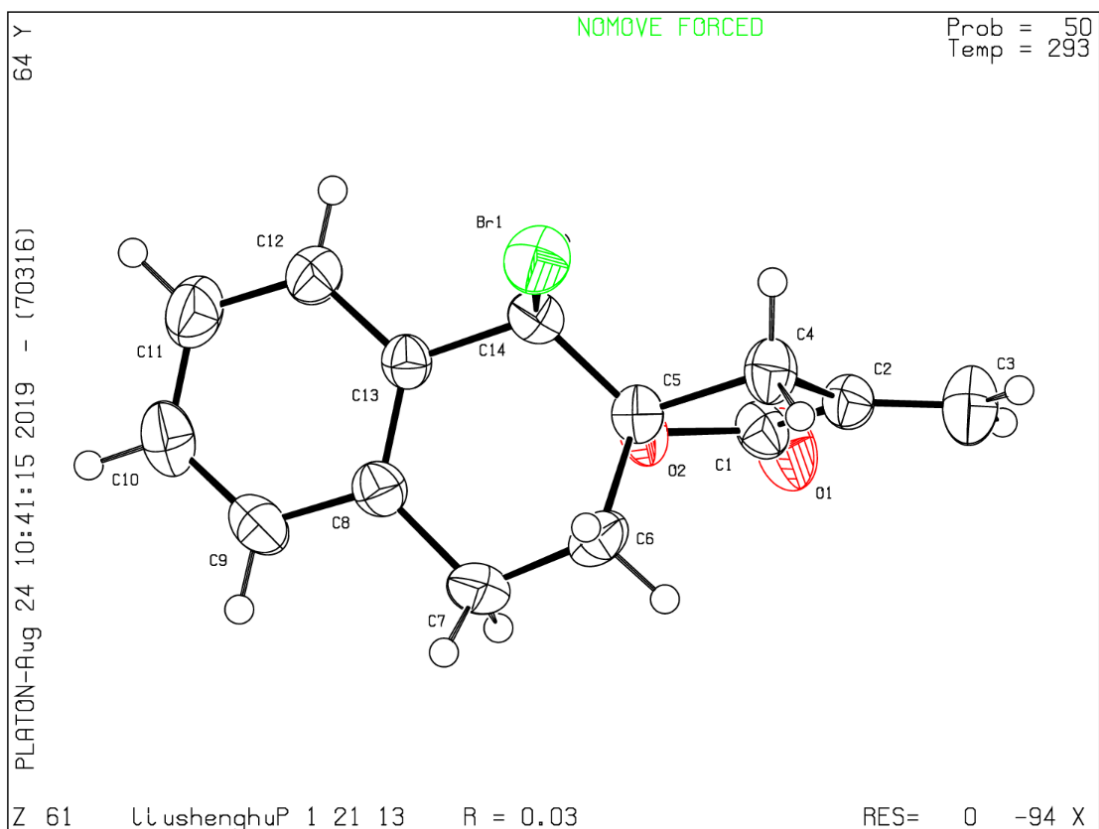

# X-ray of 2c

|                    |                                              |                    |
|--------------------|----------------------------------------------|--------------------|
| Bond precision:    | C-C = 0.0101 Å                               | Wavelength=0.71073 |
| Cell:              | a=7.3086(5)    b=10.6430(6)    c=17.7938(12) |                    |
|                    | alpha=90    beta=90    gamma=90              |                    |
| Temperature: 293 K |                                              |                    |

  

|                | Calculated    | Reported      |
|----------------|---------------|---------------|
| Volume         | 1384.10(15)   | 1384.10(15)   |
| Space group    | P 21 21 21    | P 21 21 21    |
| Hall group     | P 2ac 2ab     | P 2ac 2ab     |
| Moiety formula | C15 H15 Br O2 | C15 H15 Br O2 |
| Sum formula    | C15 H15 Br O2 | C15 H15 Br O2 |
| Mr             | 307.17        | 307.19        |
| Dx, g cm-3     | 1.474         | 1.474         |
| Z              | 4             | 4             |
| Mu (mm-1)      | 2.961         | 2.961         |
| F000           | 624.0         | 623.2         |
| F000'          | 623.12        |               |
| h,k,lmax       | 9,13,22       | 9,13,22       |
| Nref           | 2828[ 1646]   | 2663          |
| Tmin,Tmax      | 0.496,0.744   | 0.298,1.000   |
| Tmin'          | 0.472         |               |

Correction method= # Reported T Limits: Tmin=0.298 Tmax=1.000  
AbsCorr = MULTI-SCAN  
Data completeness= 1.62/0.94    Theta(max)= 26.370  
R(reflections)= 0.0562( 1727)    wR2(reflections)= 0.1294( 2663)  
S = 1.045    Npar= 171

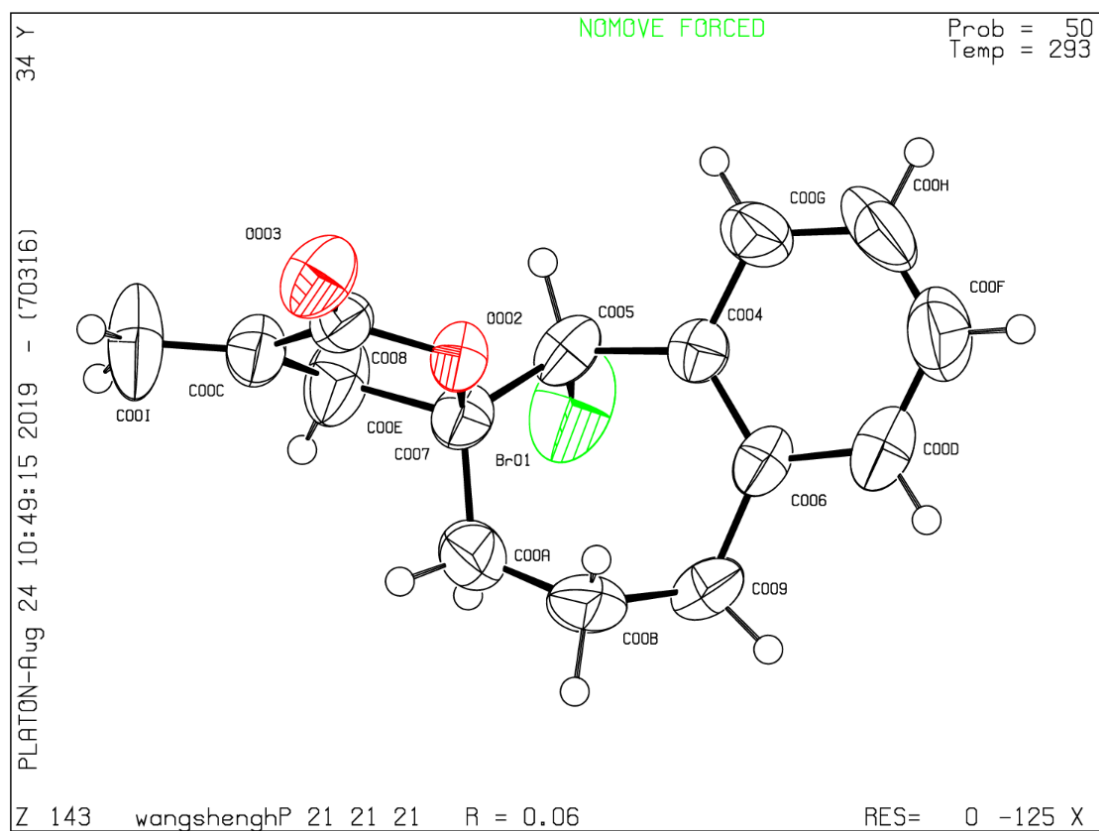

# $^1\text{H}/^{13}\text{C}$ -NMR

1-Na-Me-up  
11110a

8.53  
8.49  
8.17  
8.14  
7.98  
7.95  
7.81  
7.81  
7.75  
7.72  
7.59  
7.46  
7.36  
7.28

3.01  
2.97  
2.96  
2.96  
2.65  
2.57  
2.53  
2.19  
2.12  
2.05  
1.96  
1.78  
1.54  
1.10  
0.97

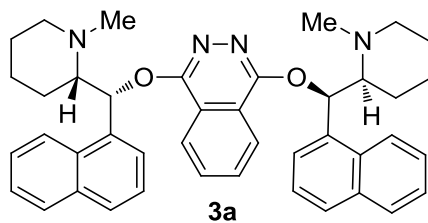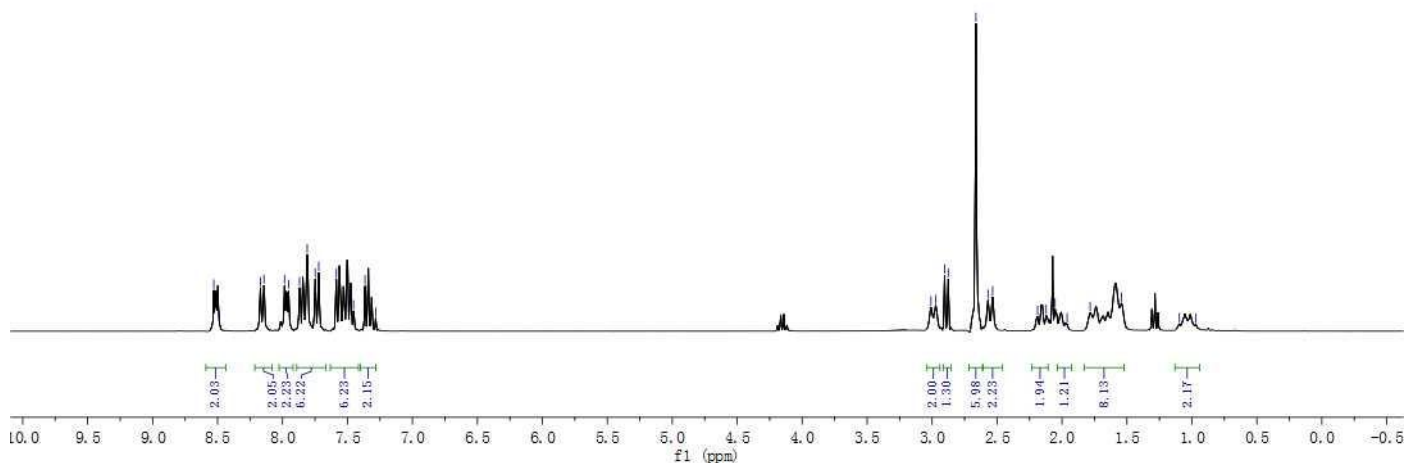

1-Na-Me-up  
11110a

156.72  
134.85  
134.83  
134.83  
131.98  
130.42  
128.87  
127.89  
125.94  
125.63  
125.03  
123.80  
123.64  
123.55  
123.11

71.74  
67.28  
58.22  
45.70  
25.81  
24.69  
24.48

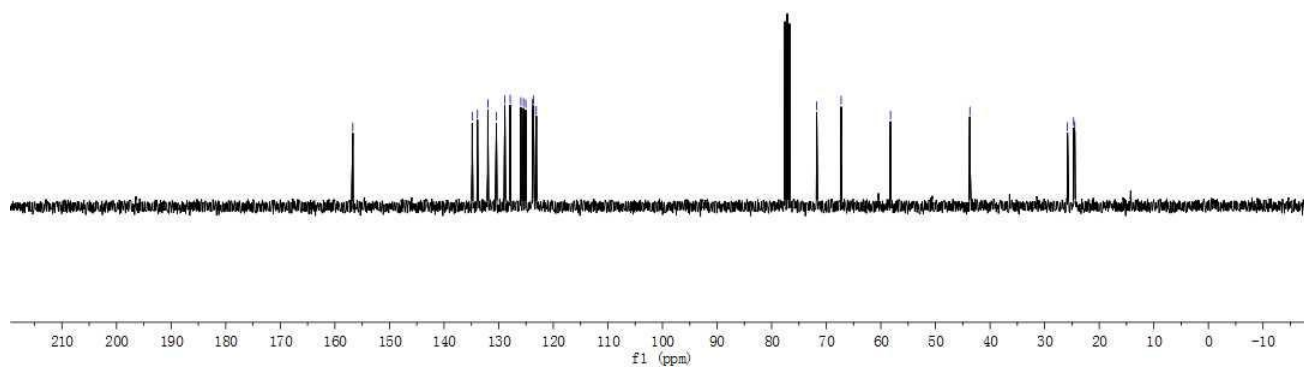

1-NA-Me-down  
11110b

8.66  
8.64  
8.30  
8.27  
7.84  
7.75  
7.61  
7.56  
7.50  
7.40  
7.13  
7.11

3.41  
3.35  
2.95  
2.91  
2.40  
2.43  
2.39

1.56  
1.51  
1.18  
1.03

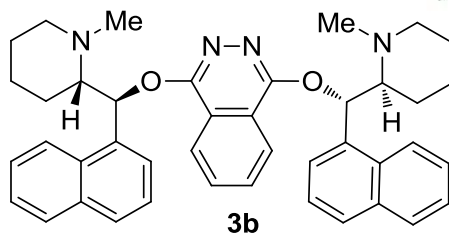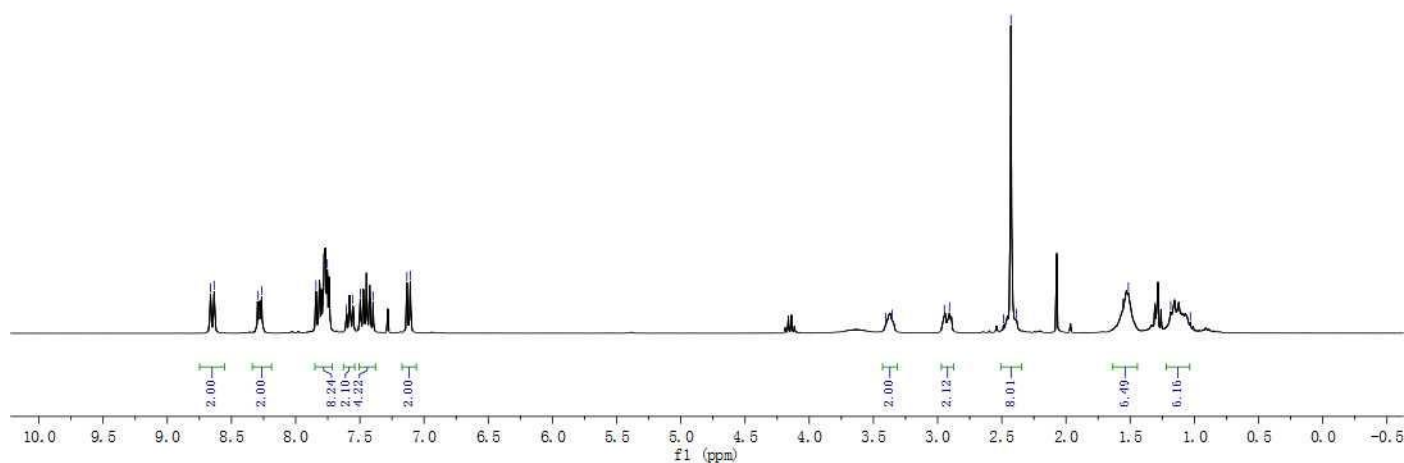

1-NA-Me-down  
11110b

156.10  
135.68  
133.97  
131.75  
131.61  
128.71  
128.42  
127.14  
125.91  
125.46  
125.36  
125.23  
123.11  
122.82

78.41  
66.33  
55.57  
42.89  
27.27  
24.19  
23.46

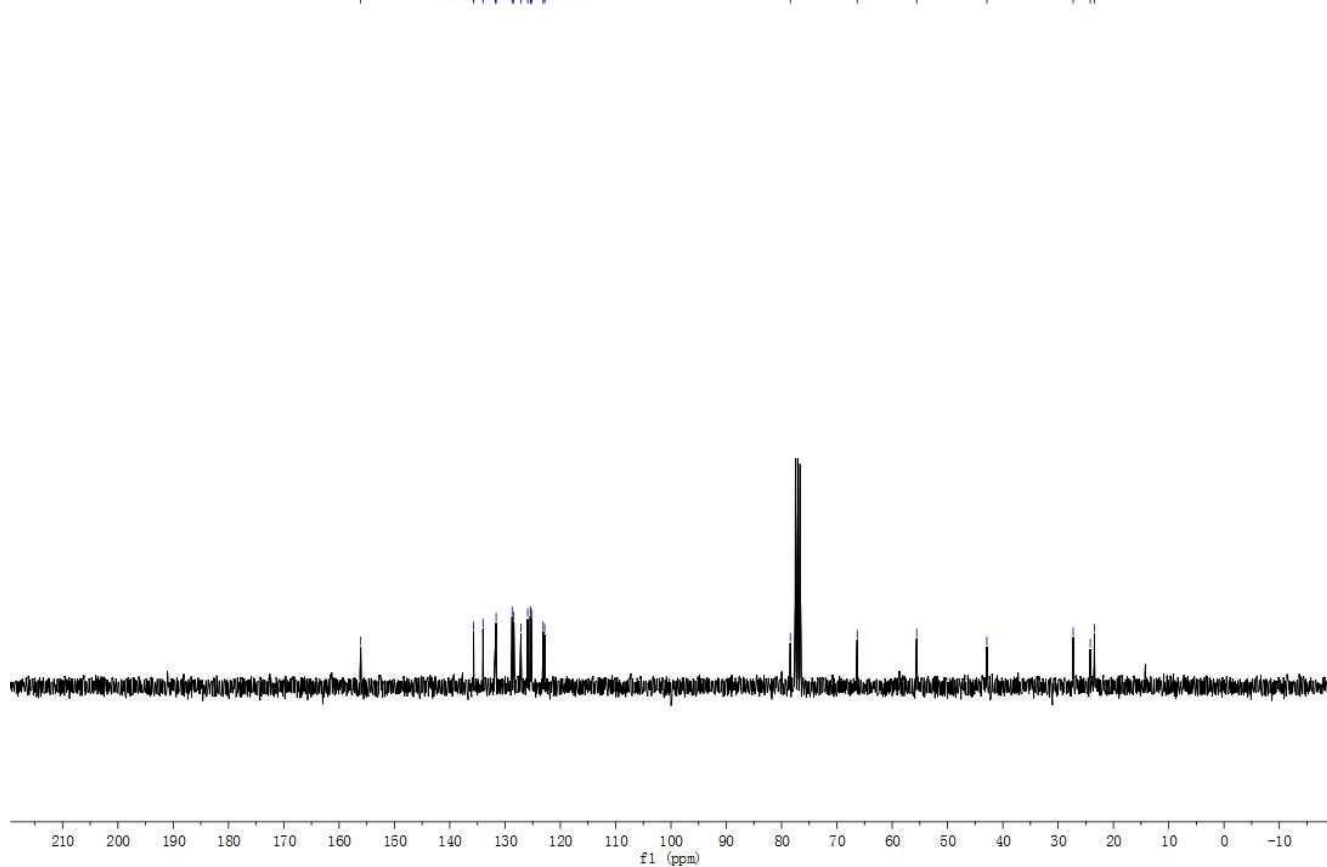

y0128e''  
y0128e''

7.93, 7.77, 7.55, 7.48, 6.15, 6.02, 5.69, 5.69, 5.42, 5.25, 3.83, 3.77, 3.29, 3.23, 3.16, 3.10, 2.48, 2.39, 1.81, 1.60, 1.19, 1.16, 1.12

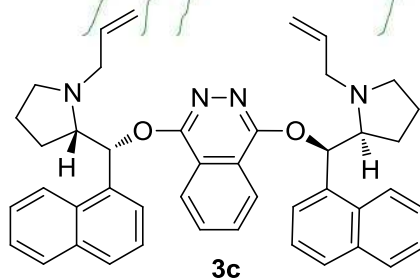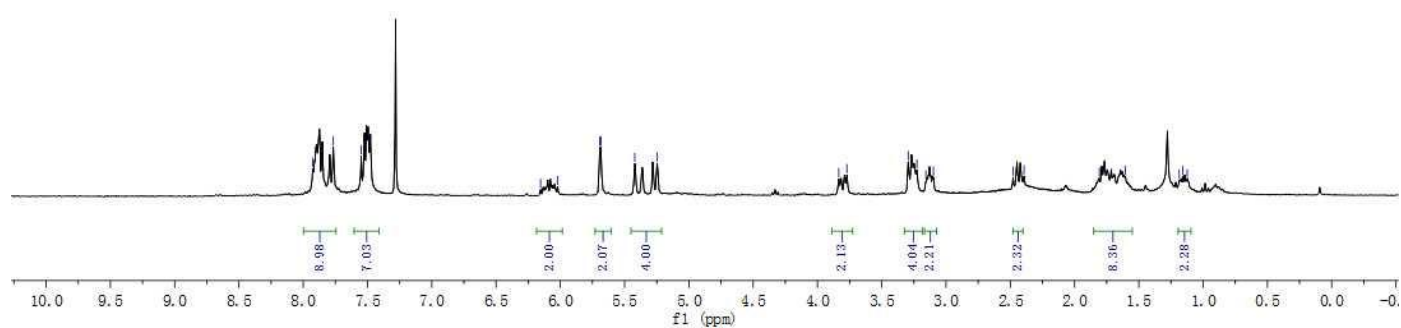

y0128e''  
y0128e

136.73, 135.63, 133.58, 130.13, 129.01, 127.38, 125.69, 125.53, 125.26, 123.30, 122.56, 117.60, 67.32, 67.13, 56.96, 54.76, 24.35, 23.40

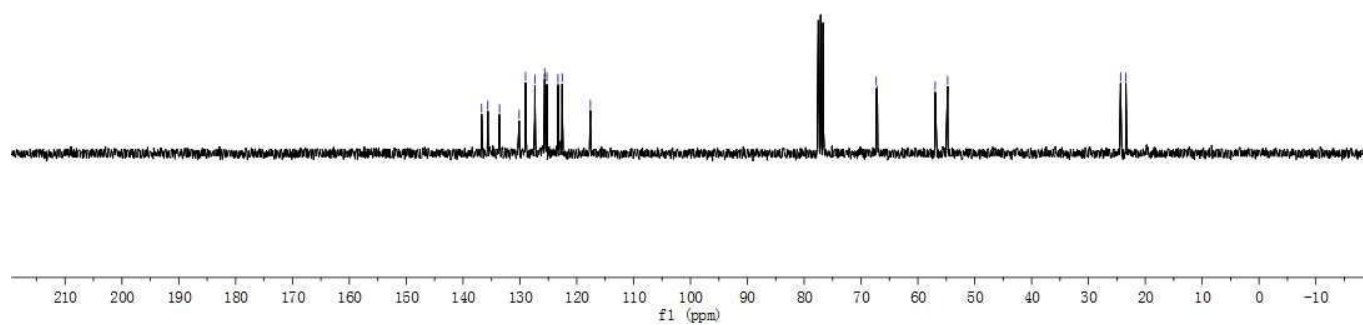



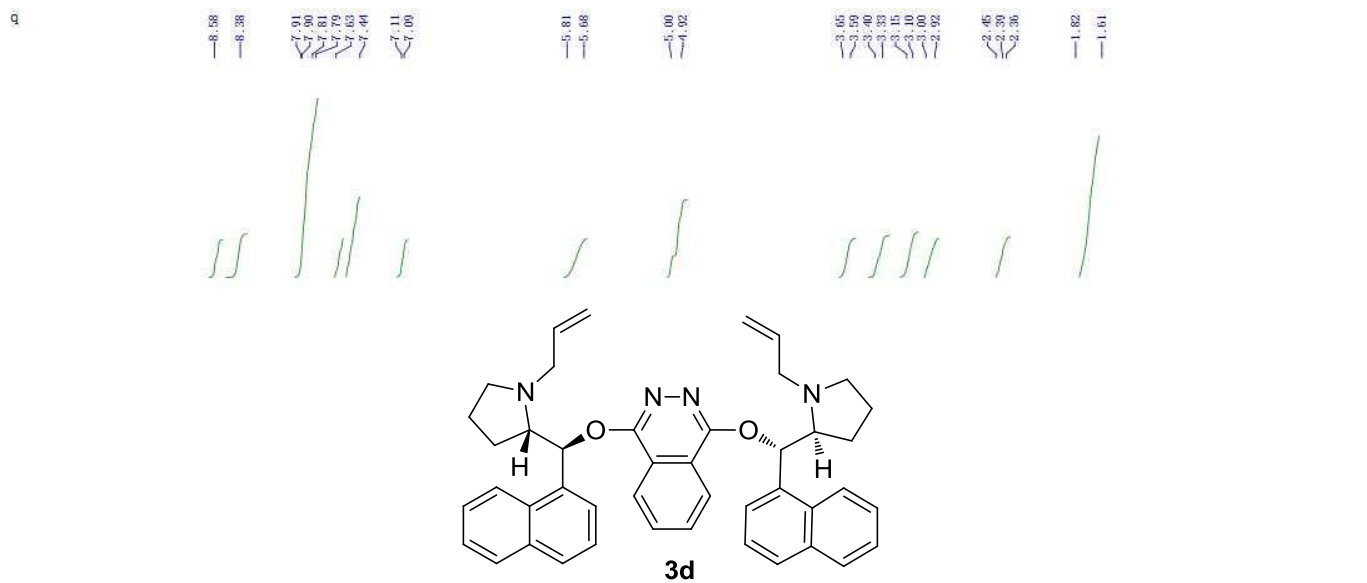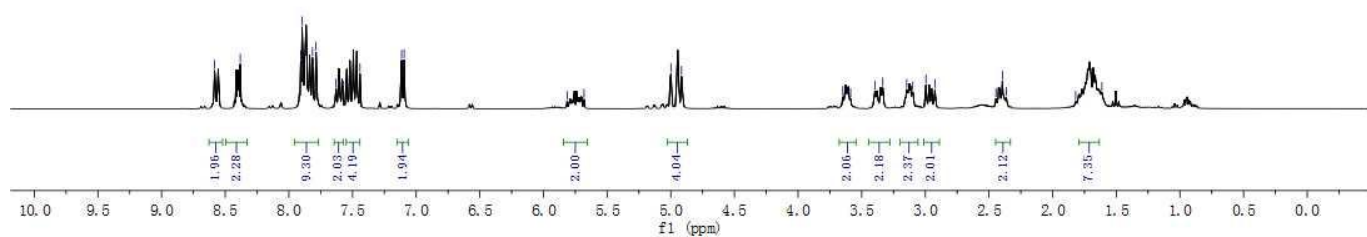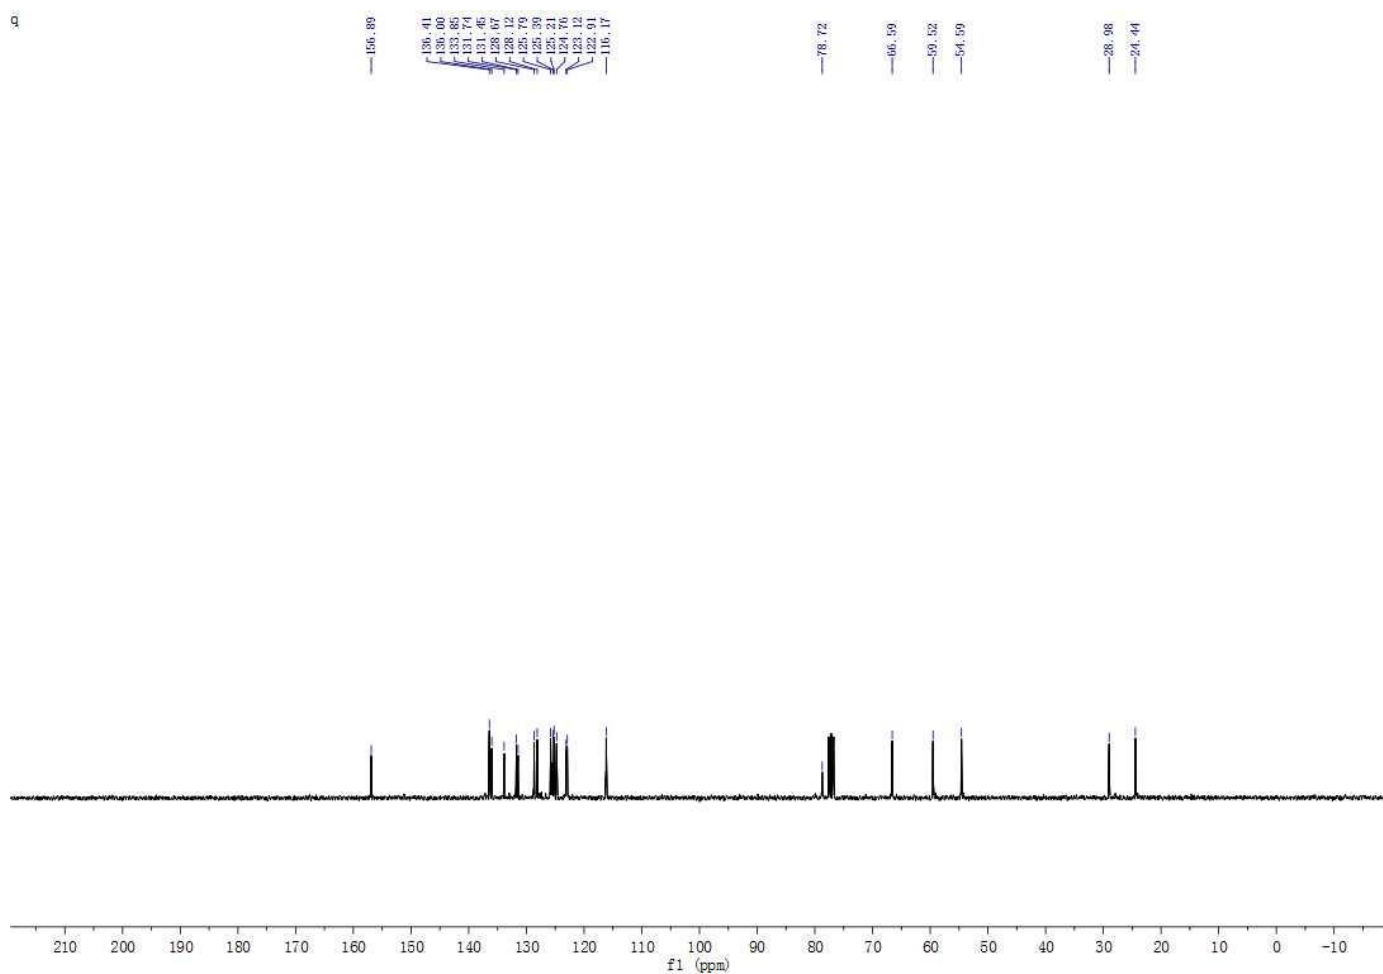

jxj0804d  
jxj0804d

8.45  
8.42  
8.19  
8.16  
7.95  
7.93  
7.87  
7.84  
7.76  
7.73  
7.63  
7.61  
7.55  
7.45  
7.38  
7.34  
7.33

3.15  
3.12  
3.10  
3.03  
2.98

2.51  
2.46  
2.24  
2.02  
1.93  
1.78  
1.58

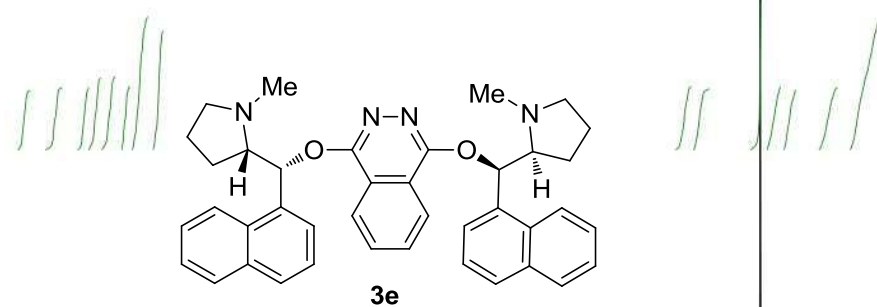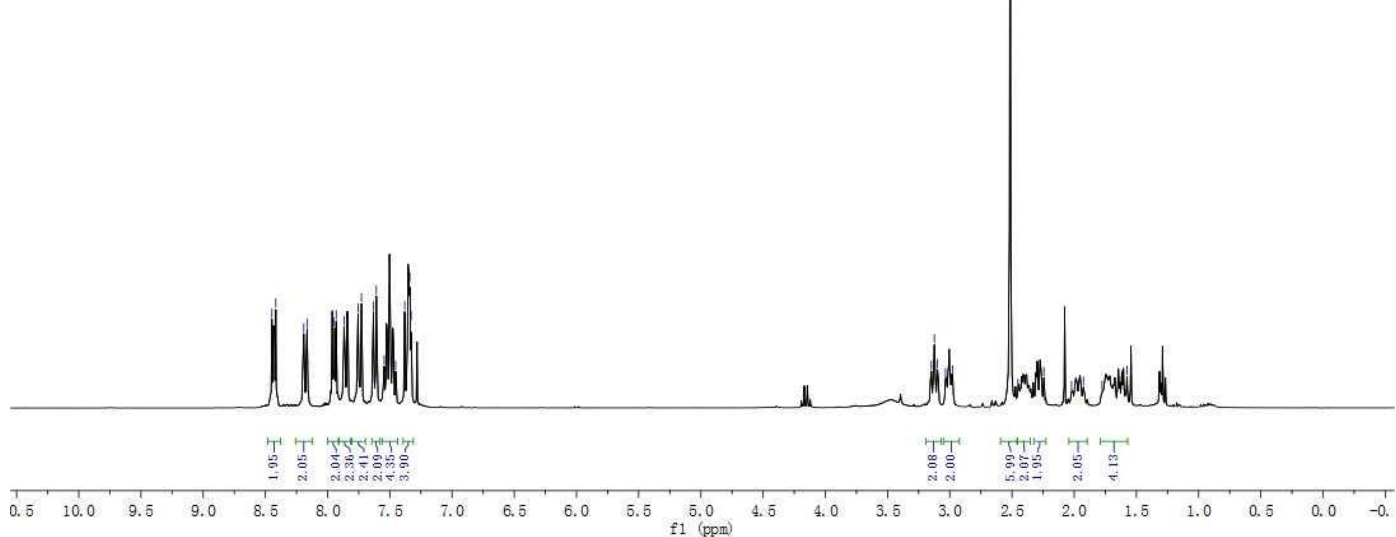

jxj0804d  
jxj0804d

156.77  
135.56  
133.82  
133.62  
130.57  
128.79  
127.89  
125.91  
125.46  
123.55  
123.51  
123.23  
123.07  
122.88

72.50  
49.27  
57.61  
41.08  
25.29  
23.40

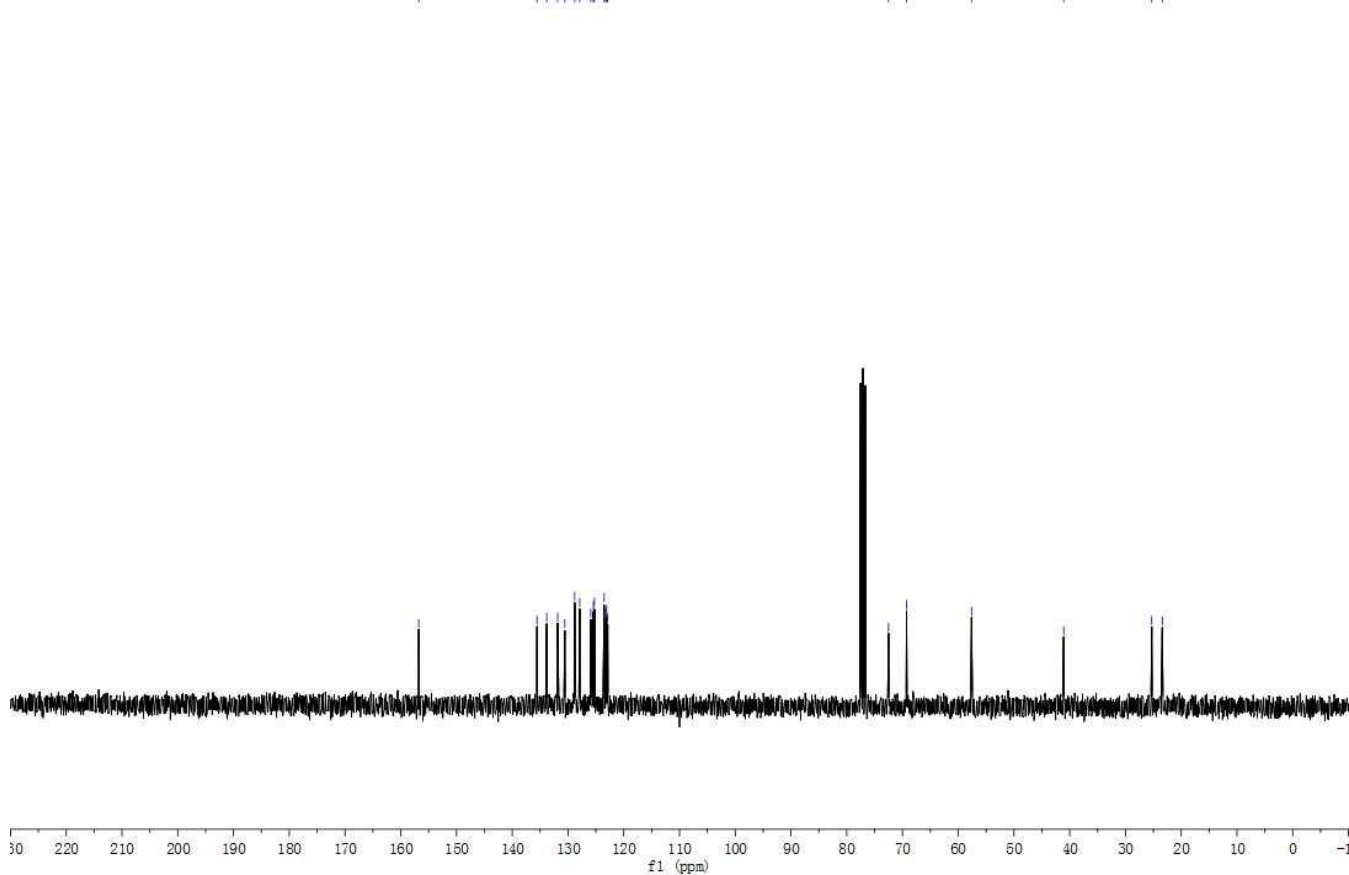

jxj0917c  
jxj0917c

8.39  
8.36  
7.92  
7.83  
7.75  
7.66  
7.54  
7.47  
7.42  
7.29  
7.24  
7.14  
7.09

5.73  
5.60

5.05  
4.95

3.25  
3.19  
3.08  
3.04  
2.95  
2.88

2.40  
2.32  
2.11  
2.04  
1.75  
1.59

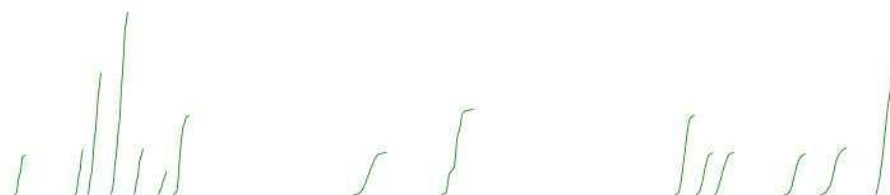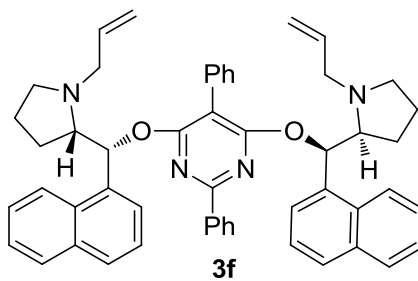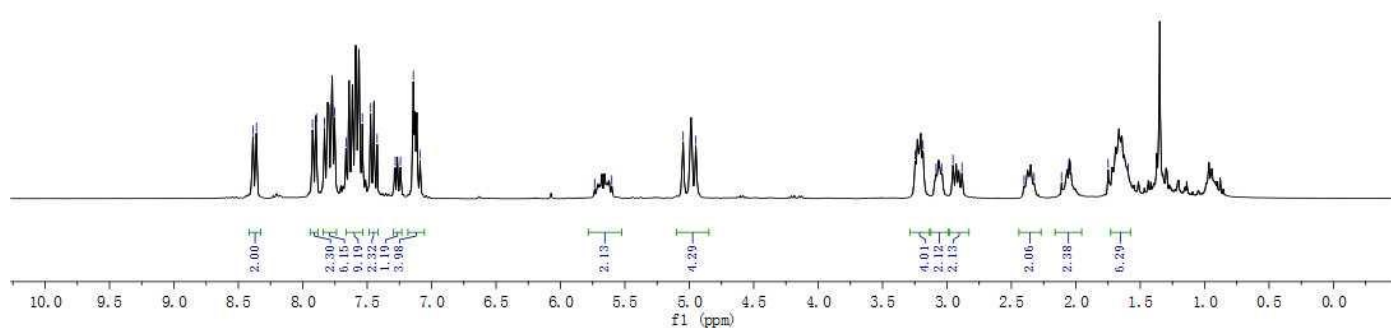

jxj0917c  
jxj0917c

159.79  
153.40  
139.17  
129.33  
128.57  
123.95  
123.88  
122.85  
121.71  
120.60  
120.71  
120.65  
120.58  
120.18  
118.63  
118.28  
118.10  
117.39  
116.84

97.52

68.05

59.65

50.84

47.46

19.72  
16.33

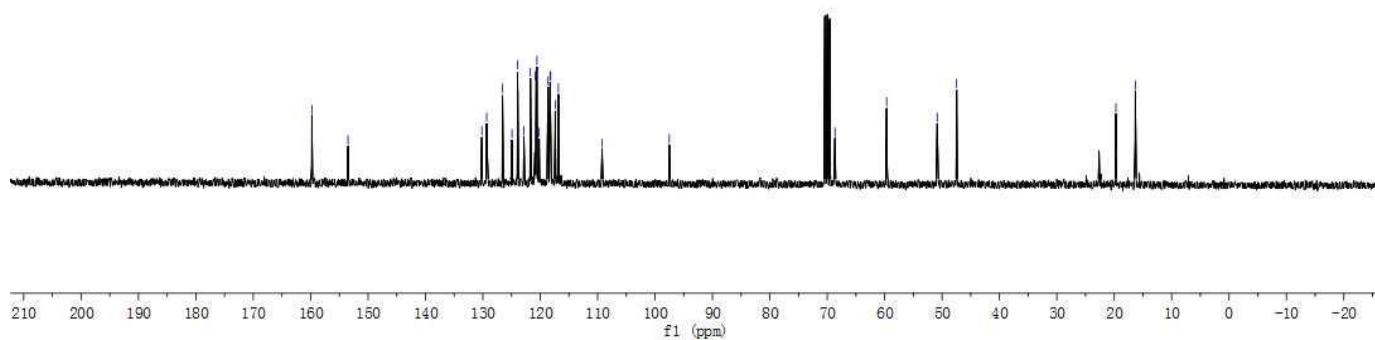

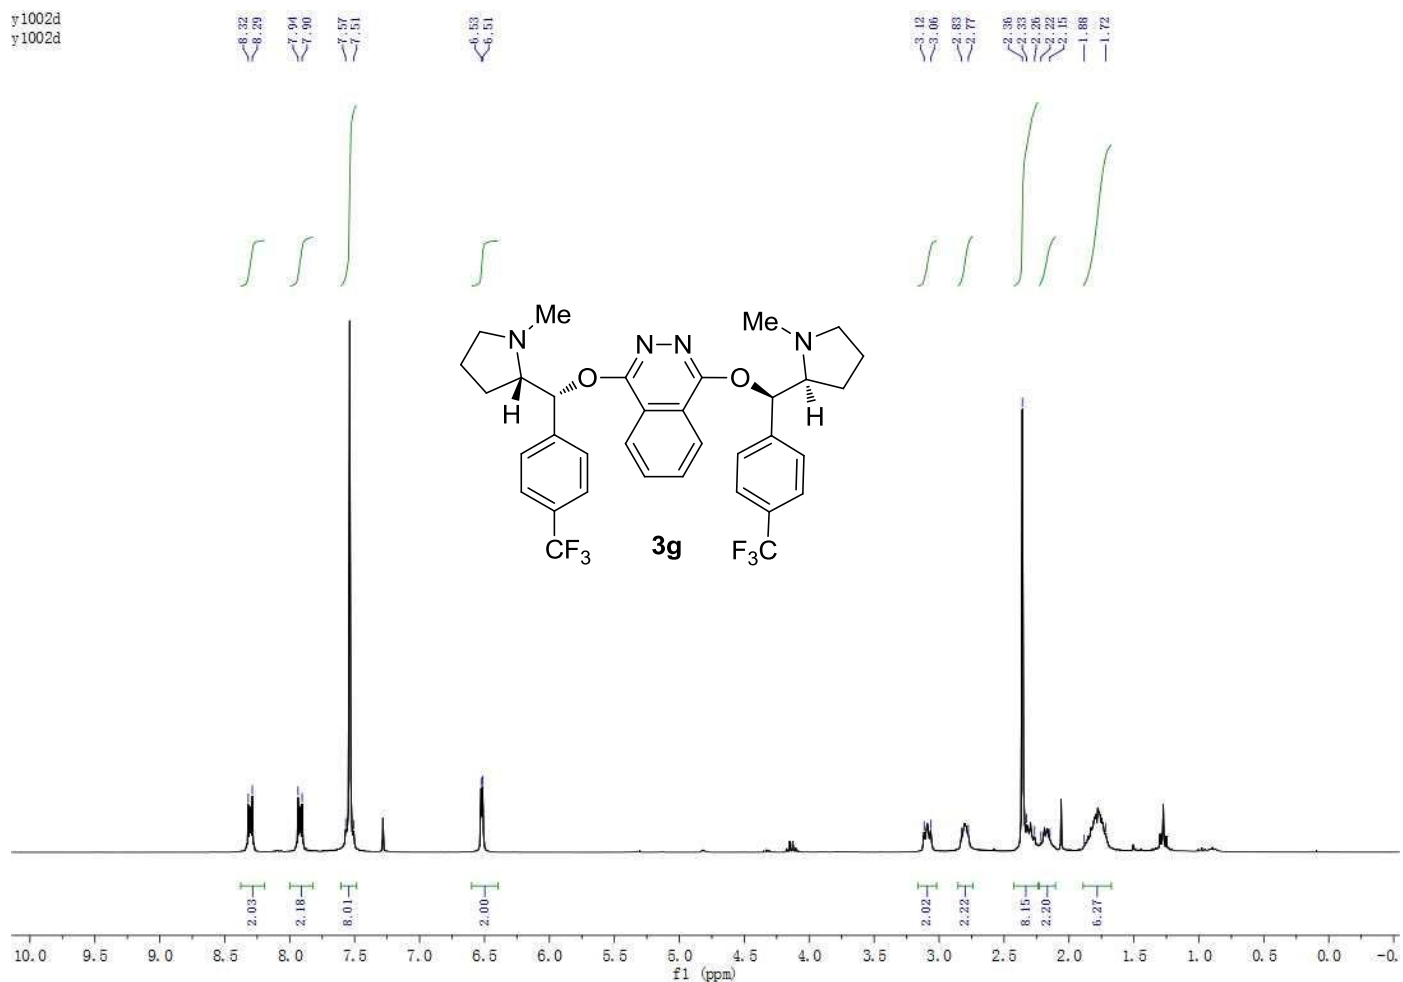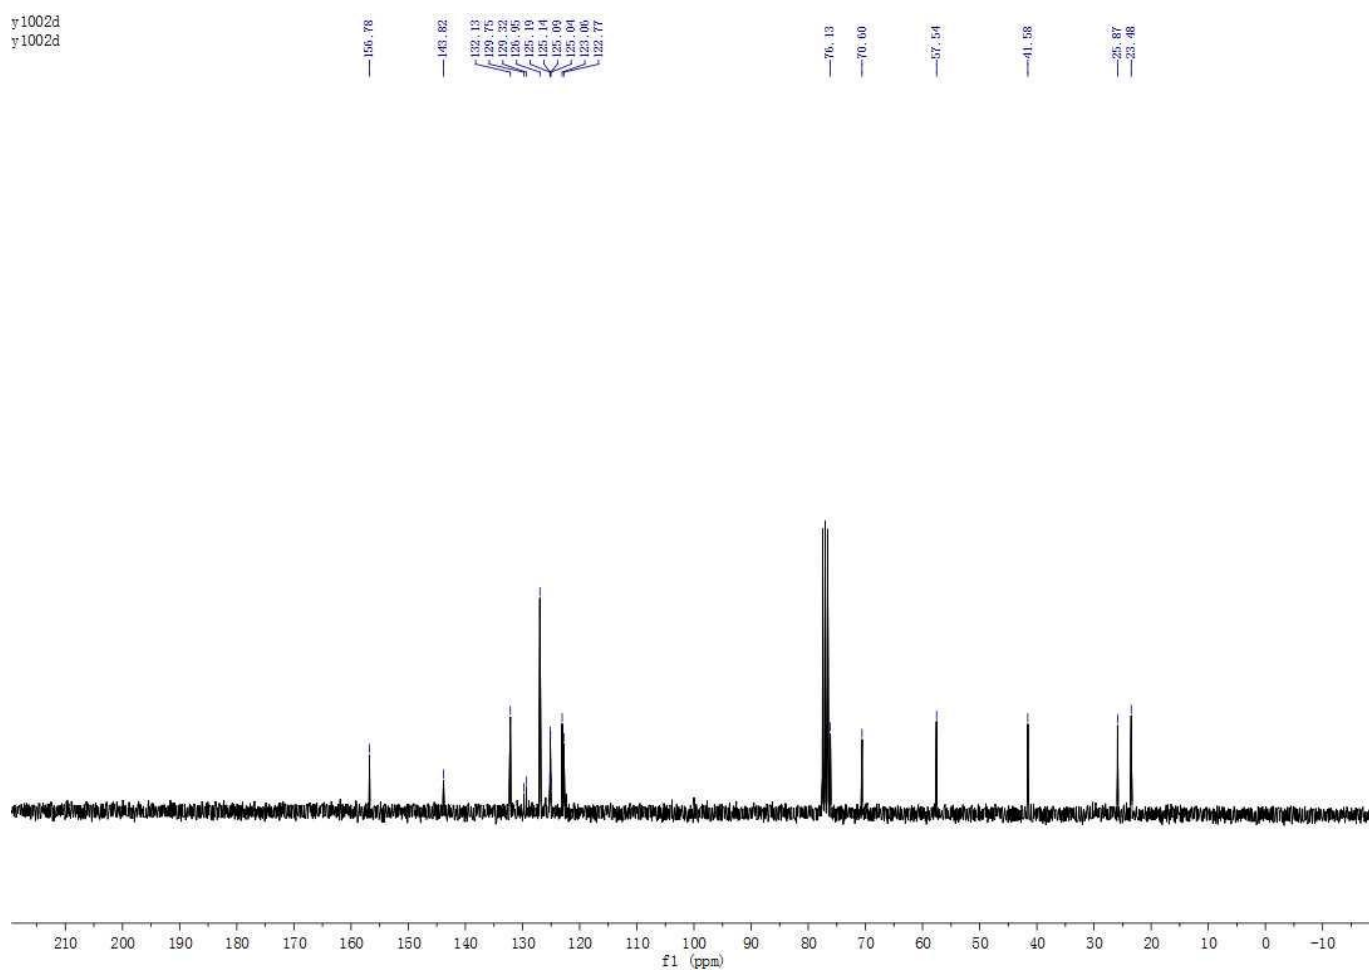

Y0303A  
Y0303A

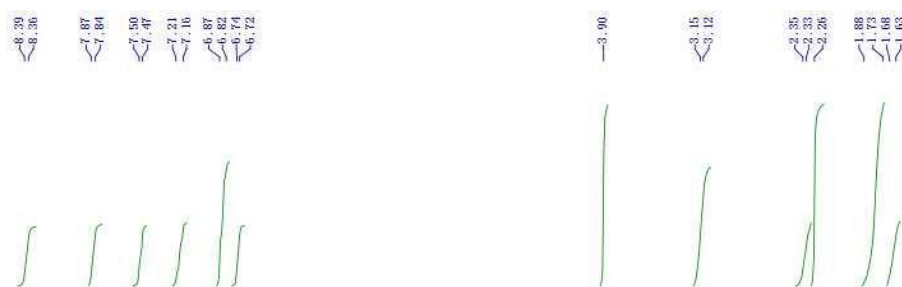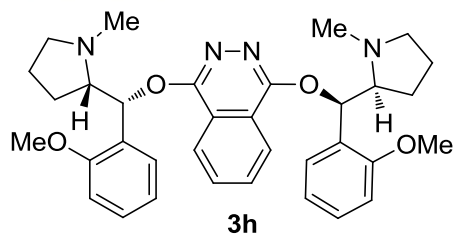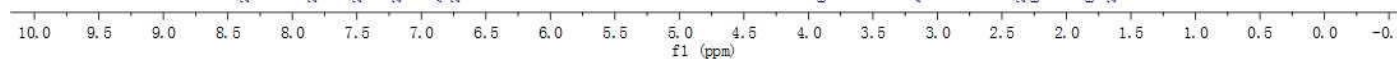

Y0303A  
Y0303A

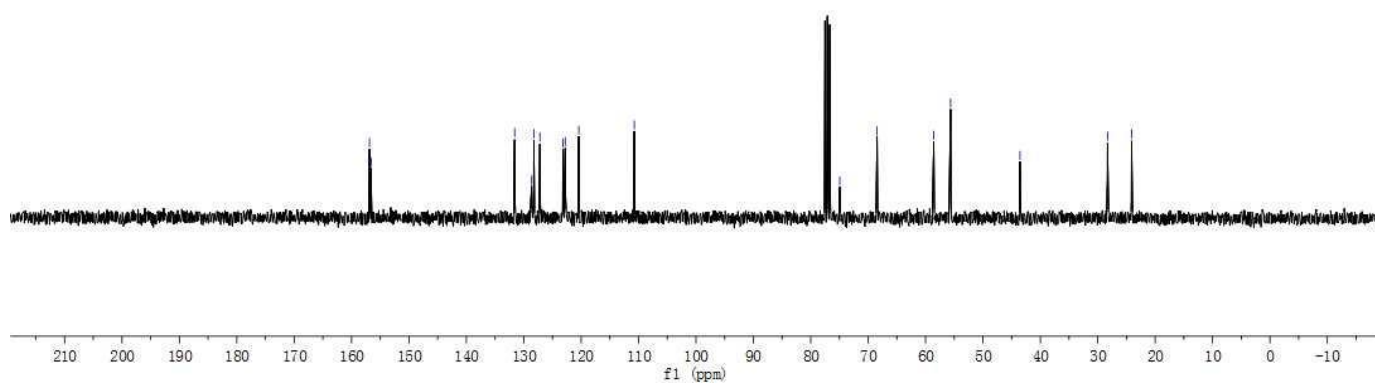

six-membered ring

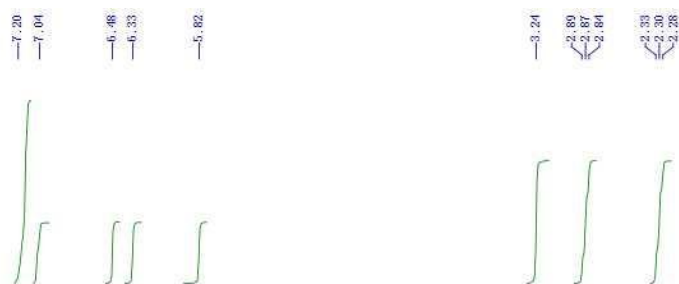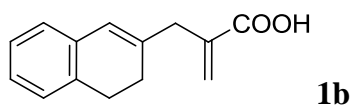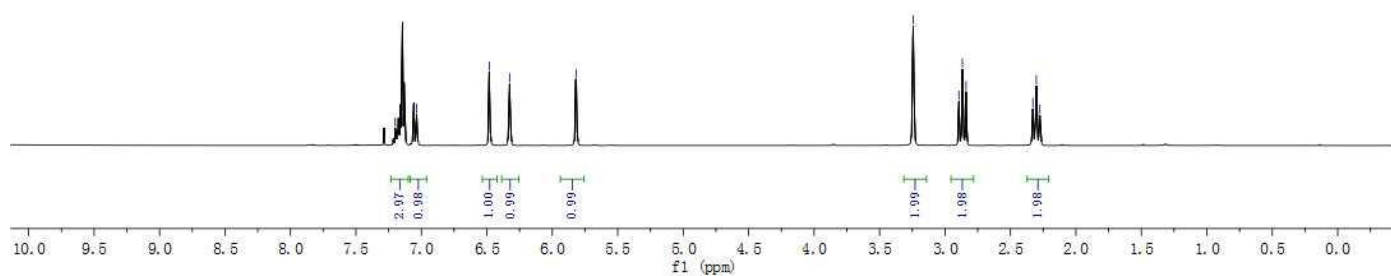

six-membered ring

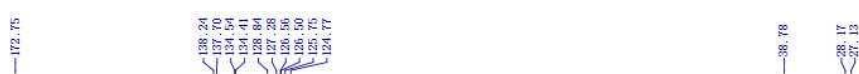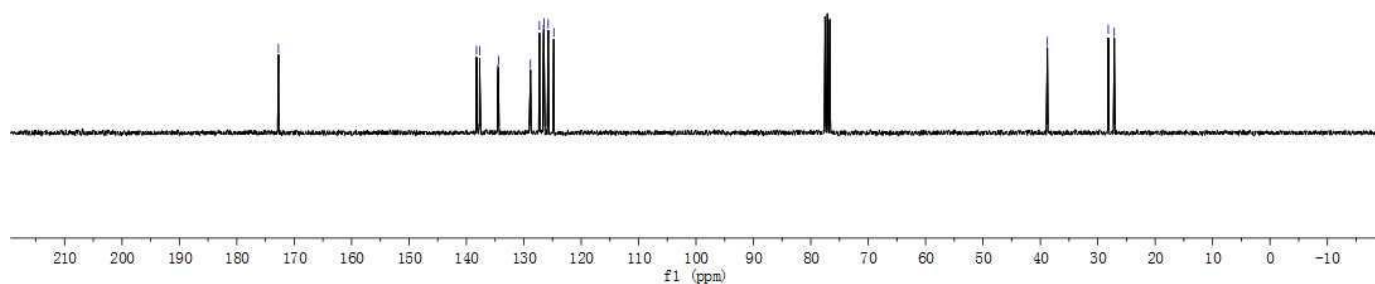

seven-membered ring  
H1

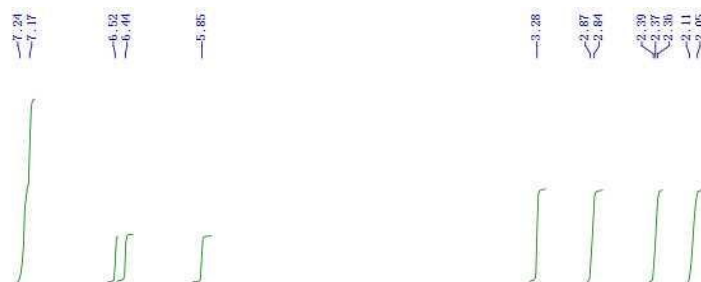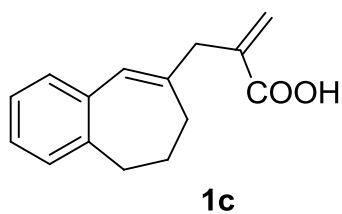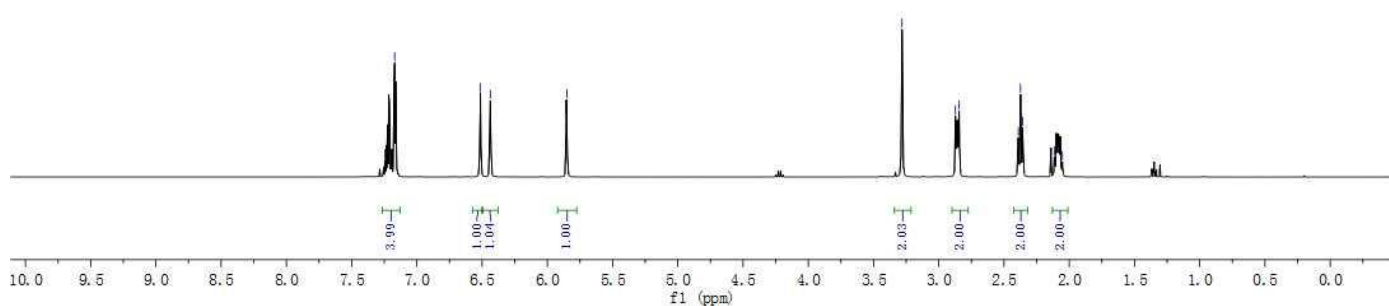

seven-membered ring  
C13

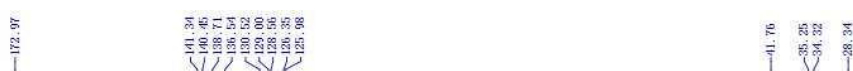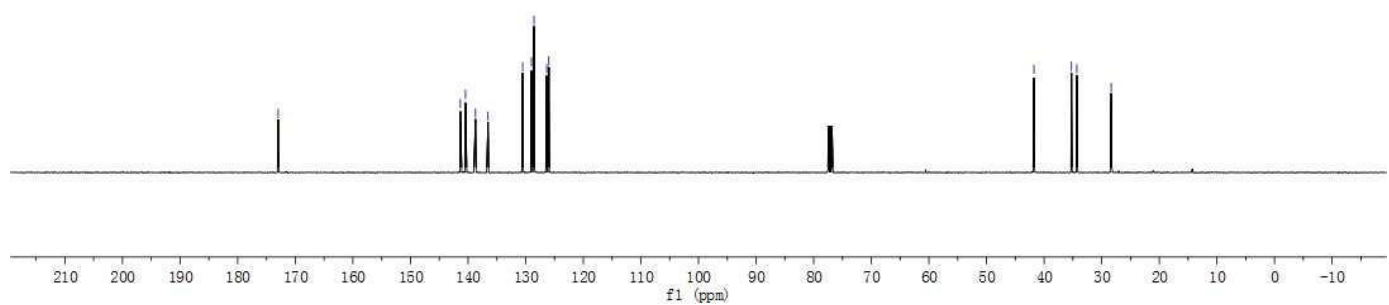

WW0518A

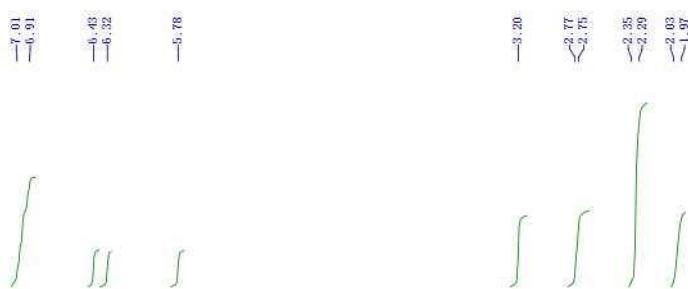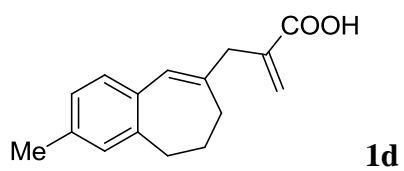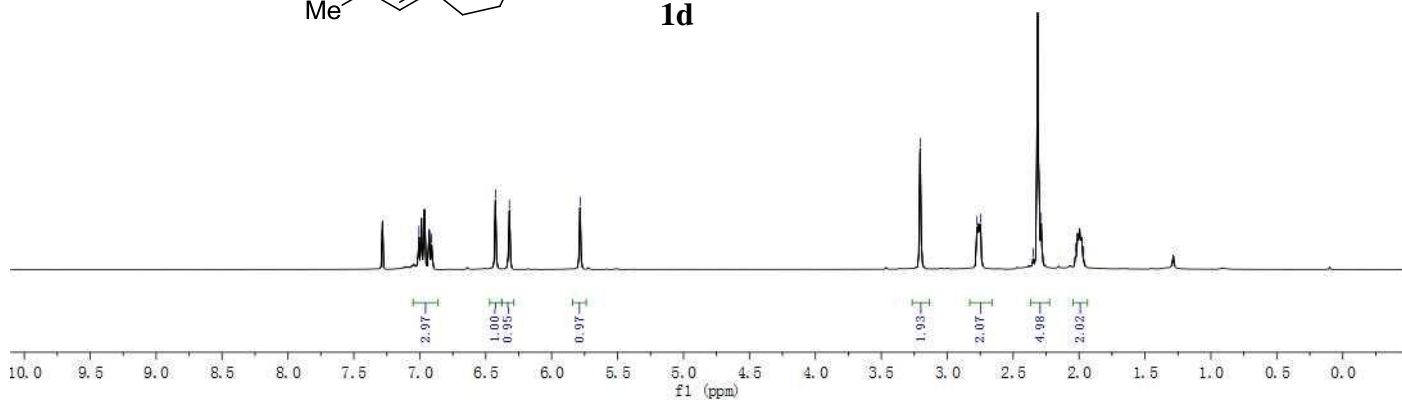

WW0518A

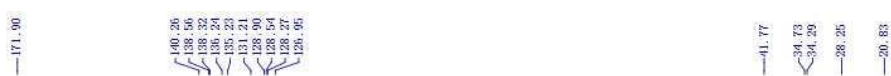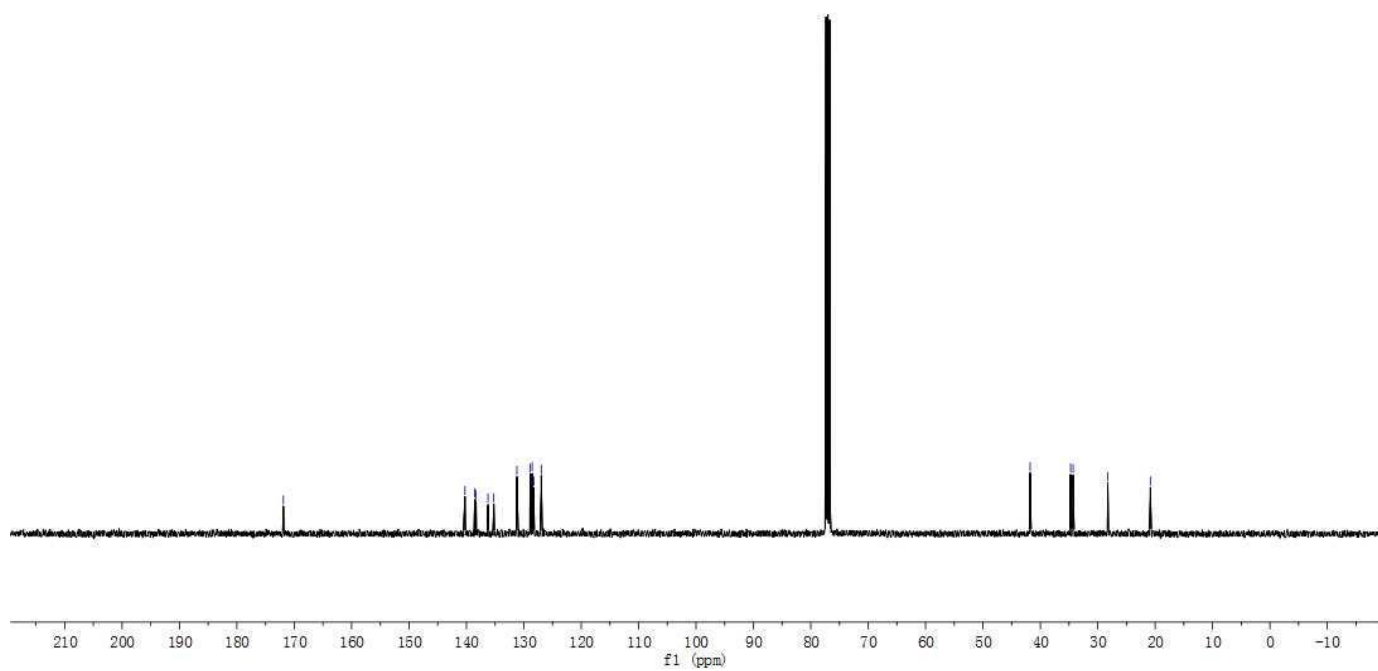



WW0518B

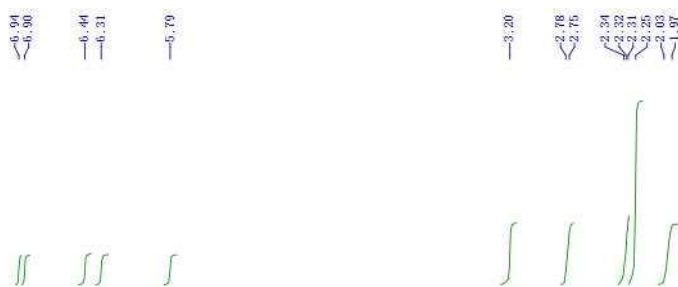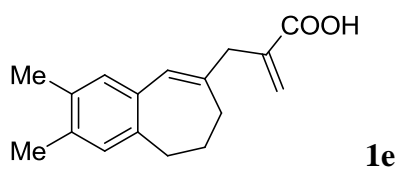

WW0518B

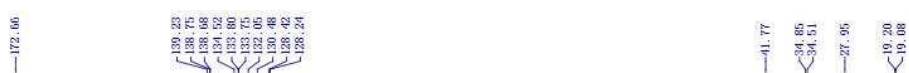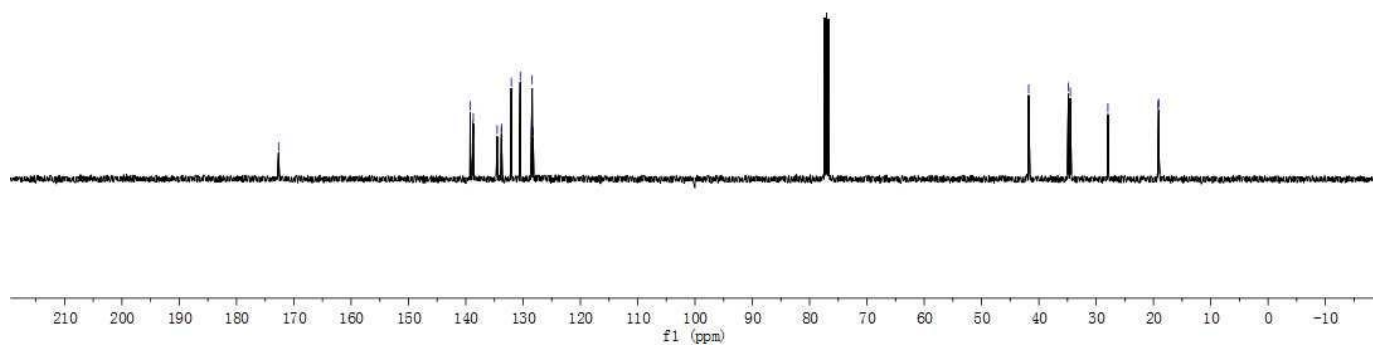

WW0707B

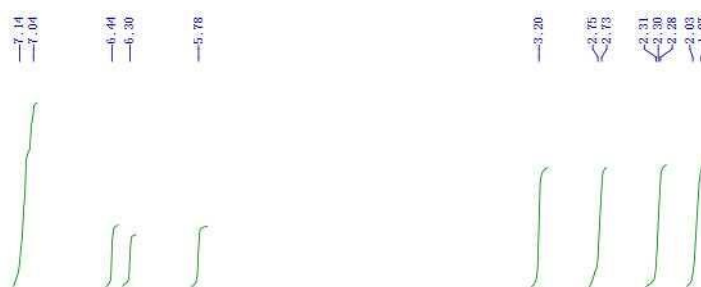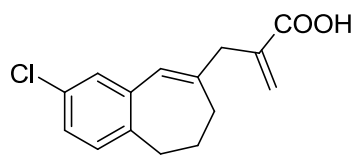

**1f**

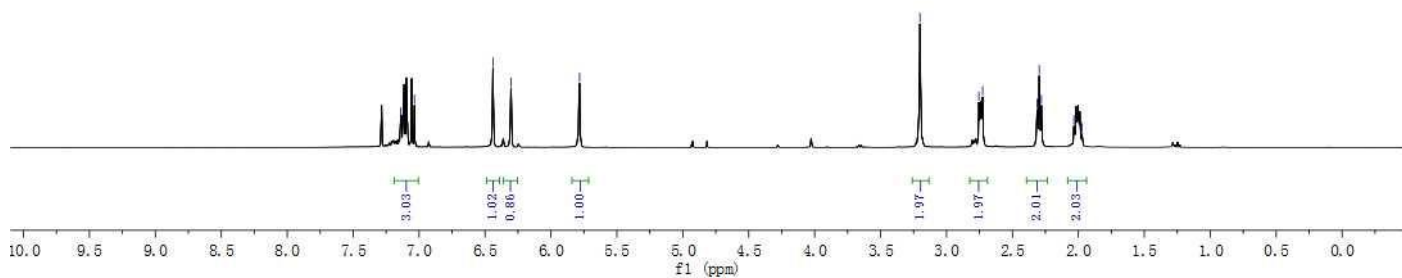

WW0707B

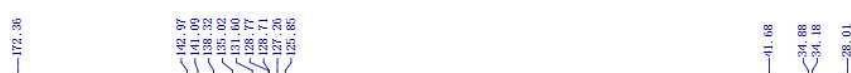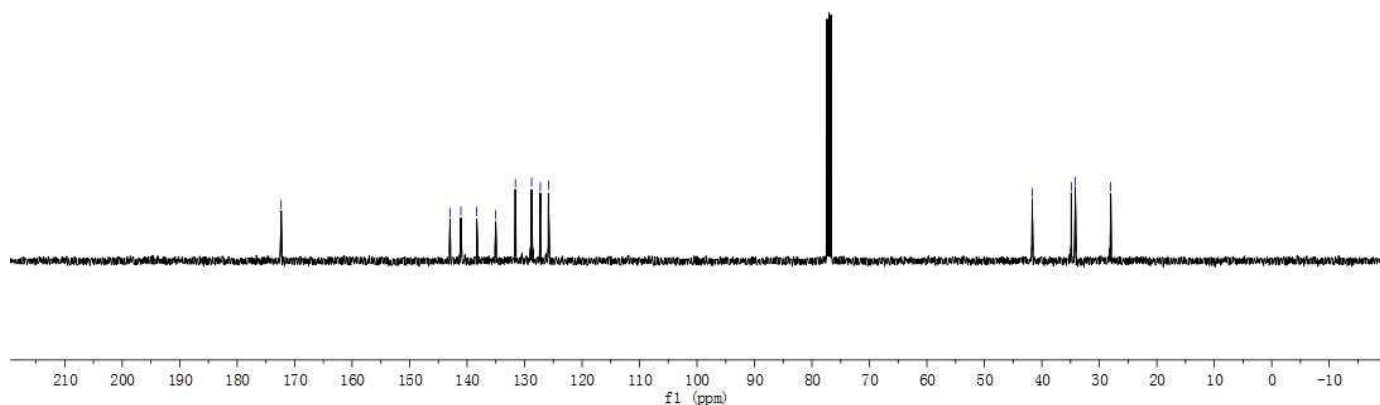

WW0713C

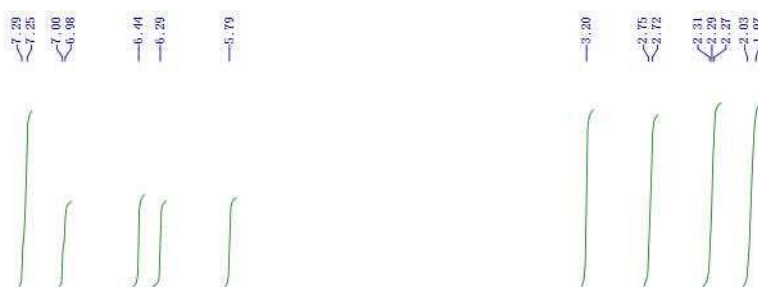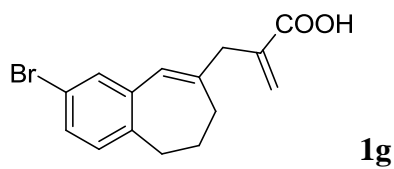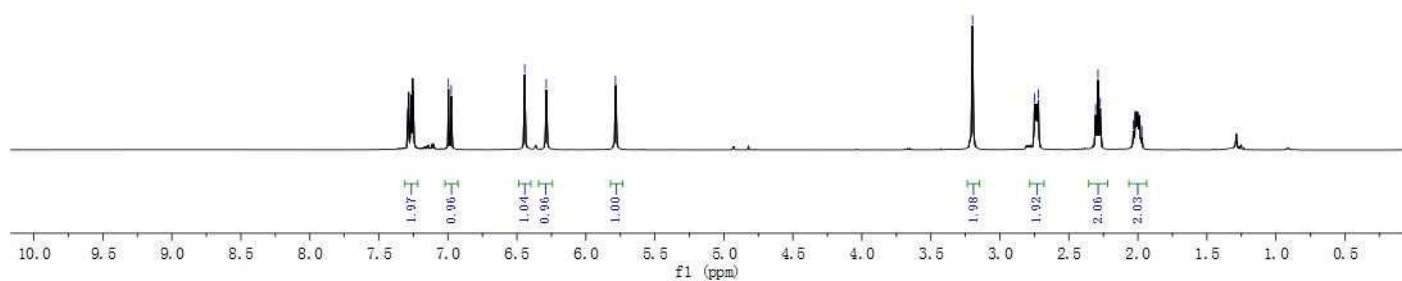

WW0713C

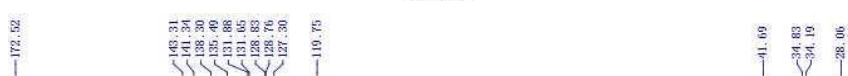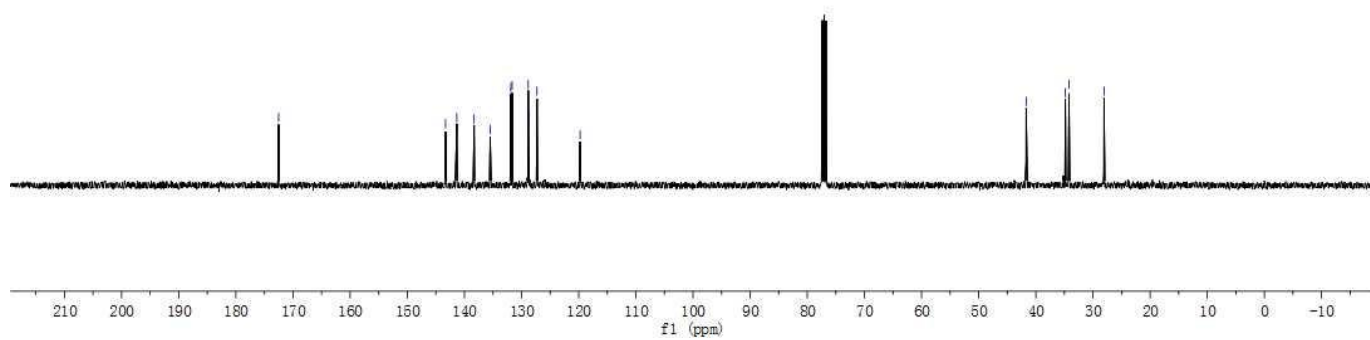

WW0801C

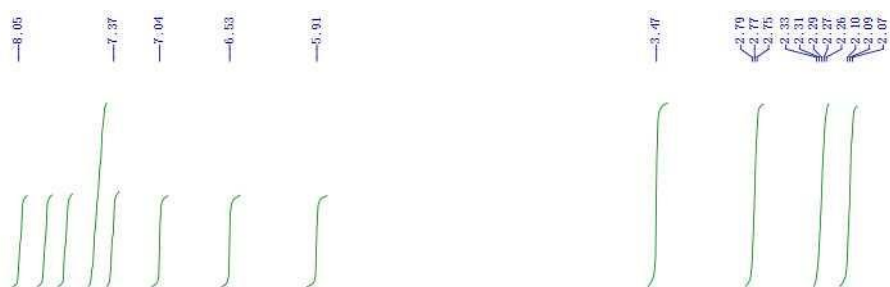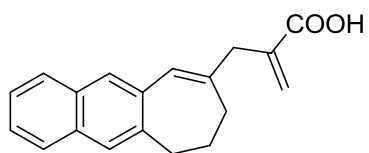

**1h**

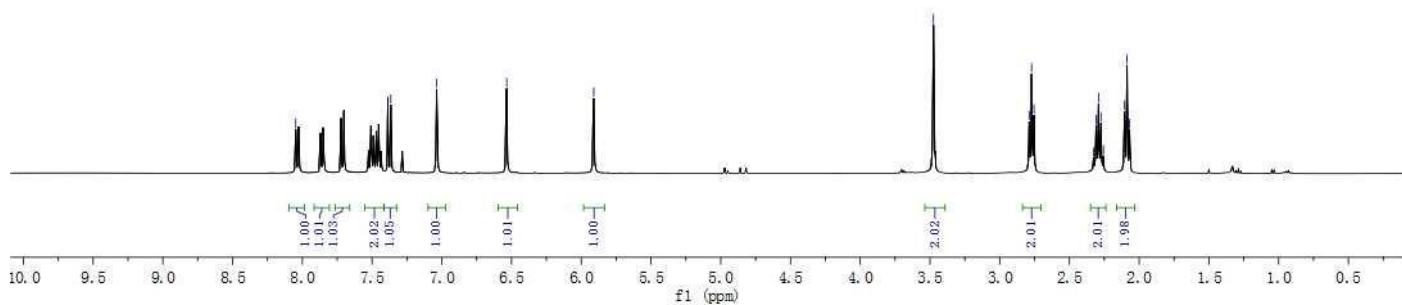

WW0801C

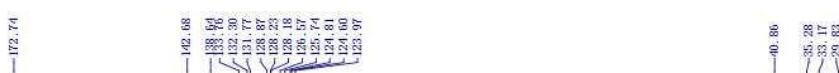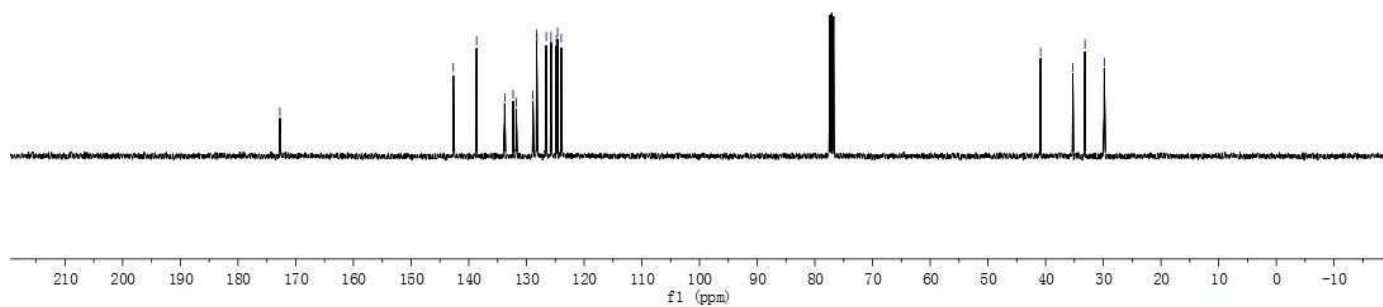

WW0727H

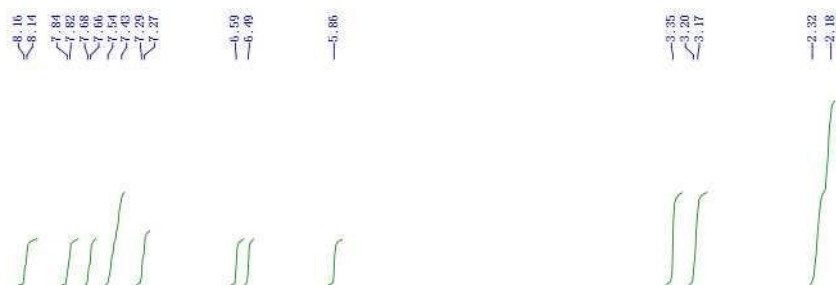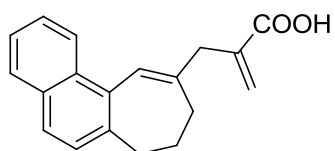**1i**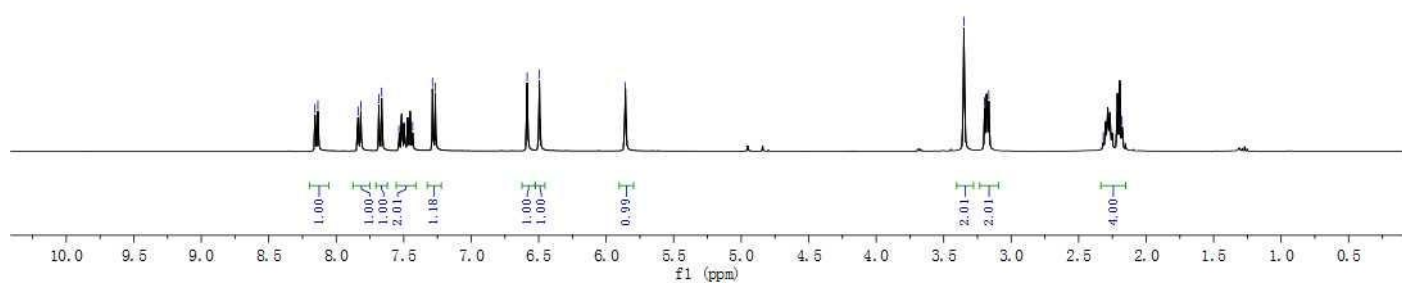

WW0727H

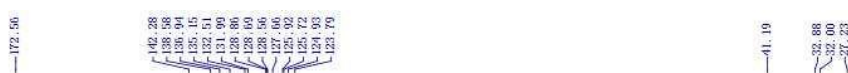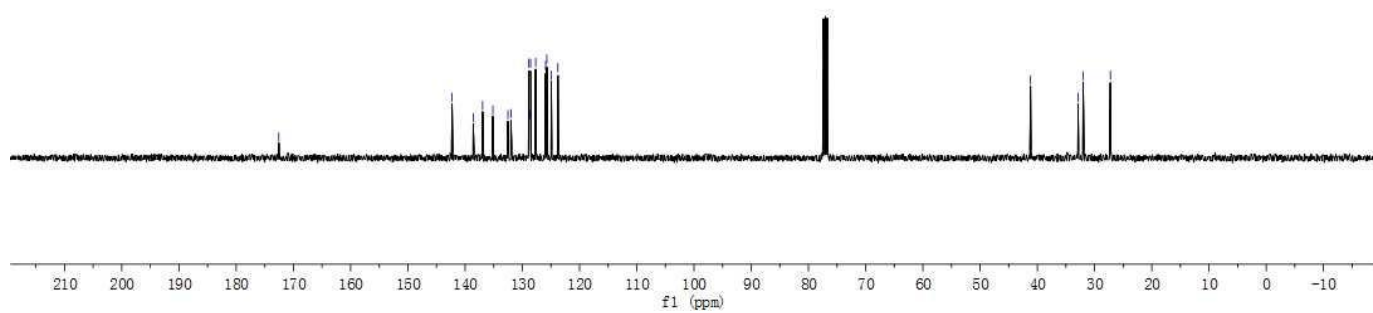

S45

WW0629A

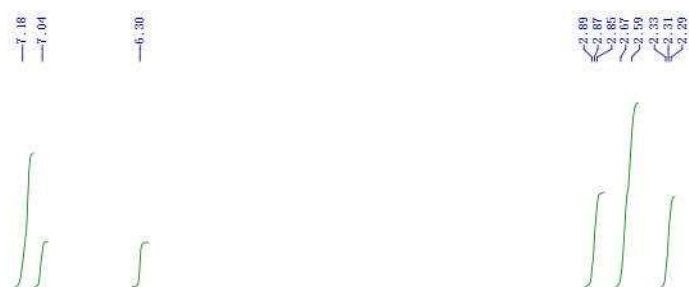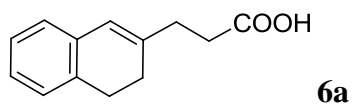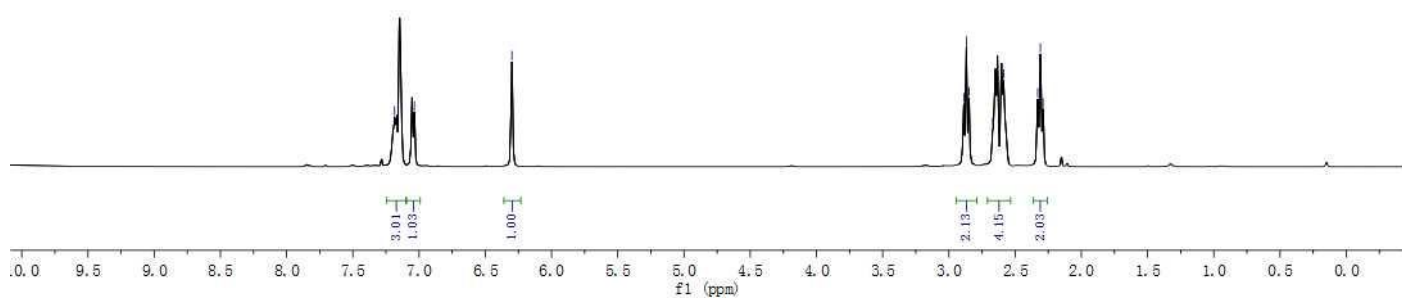

WW0629A

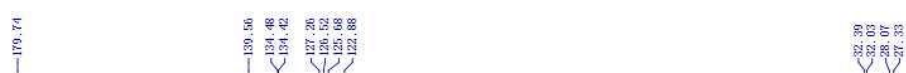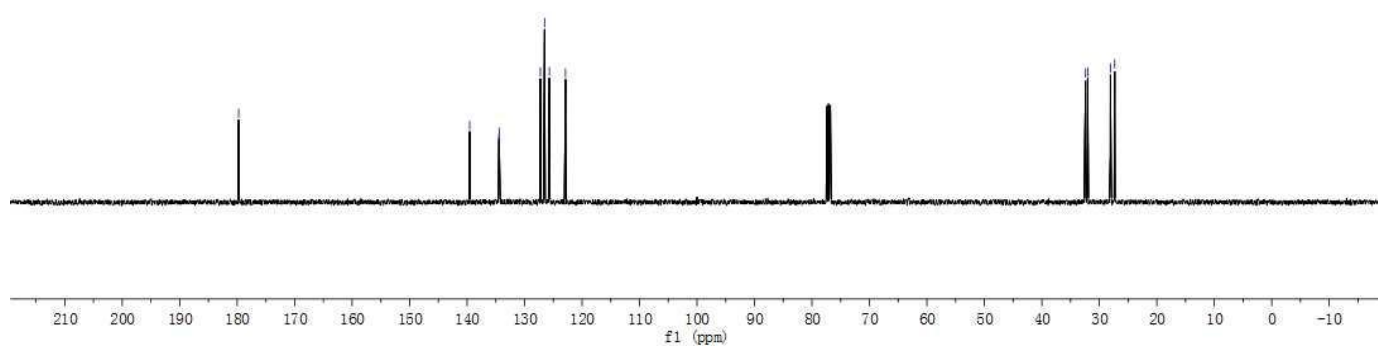

WW0623A

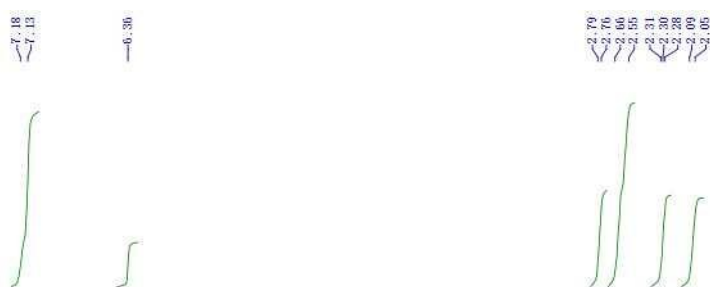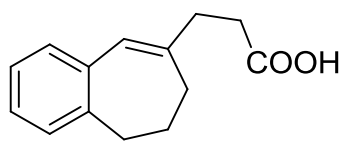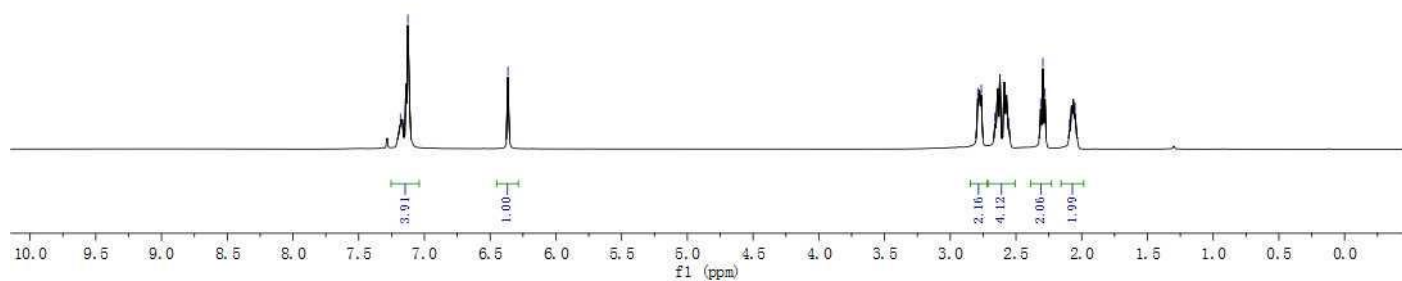

WW0623A

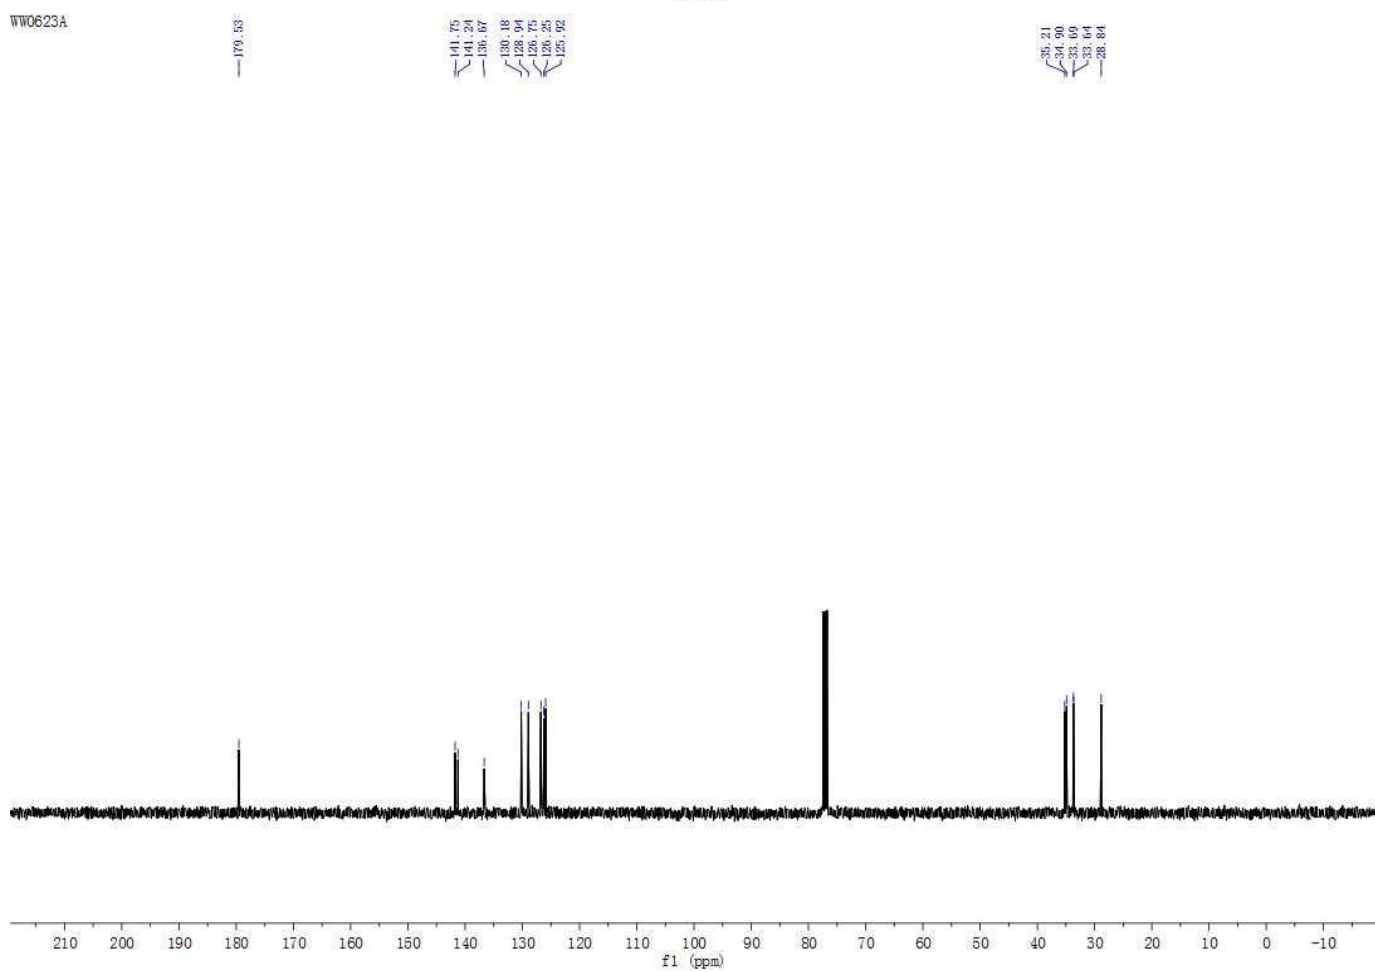

jxj0414a

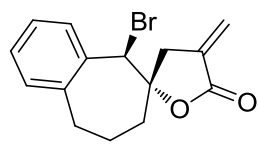**2c**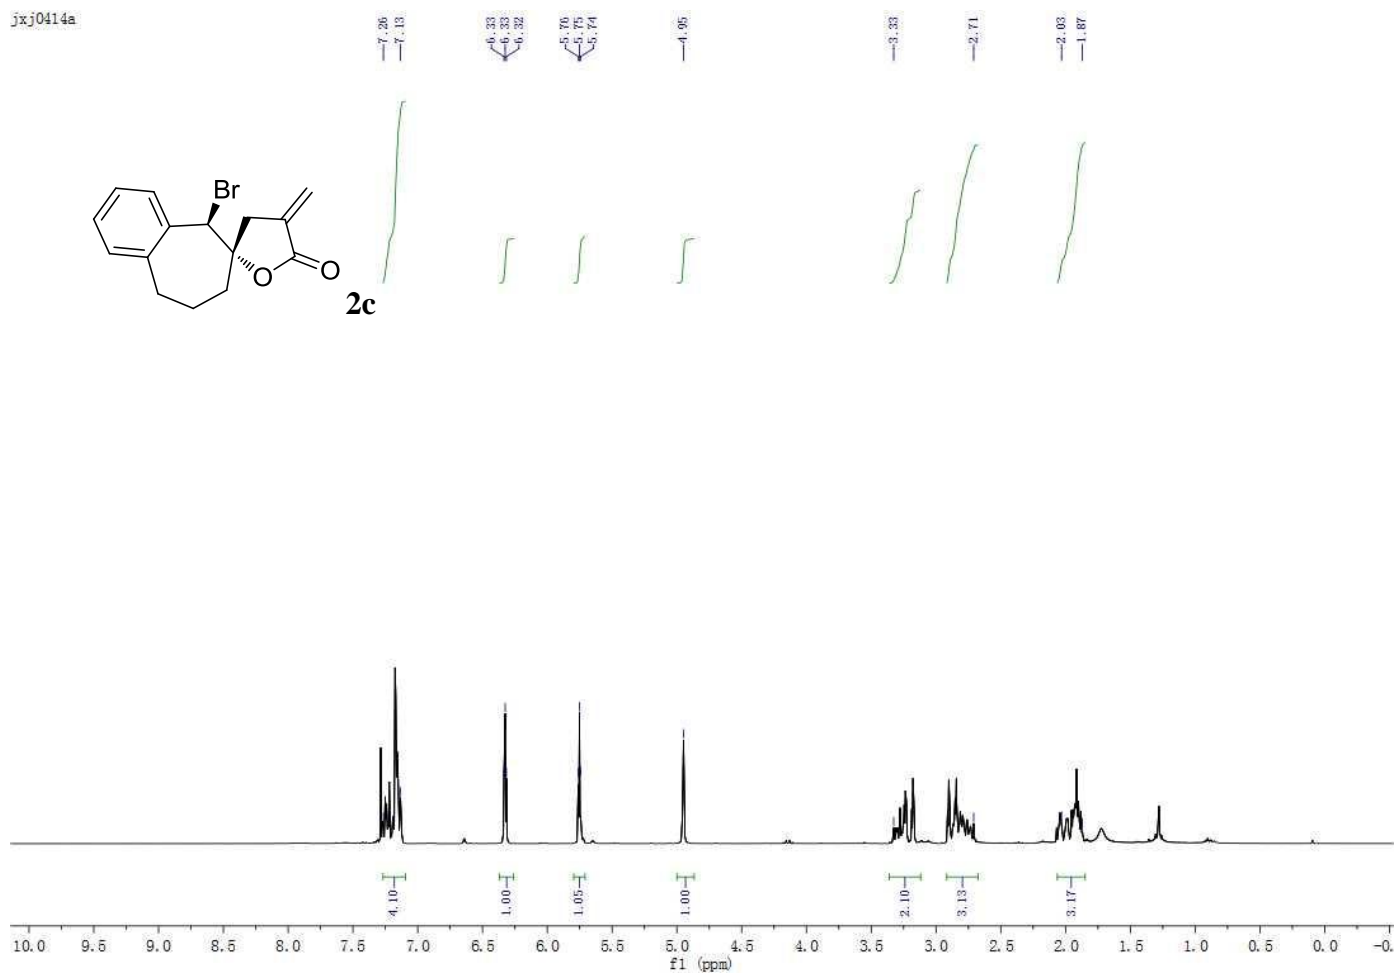

jxj0414c

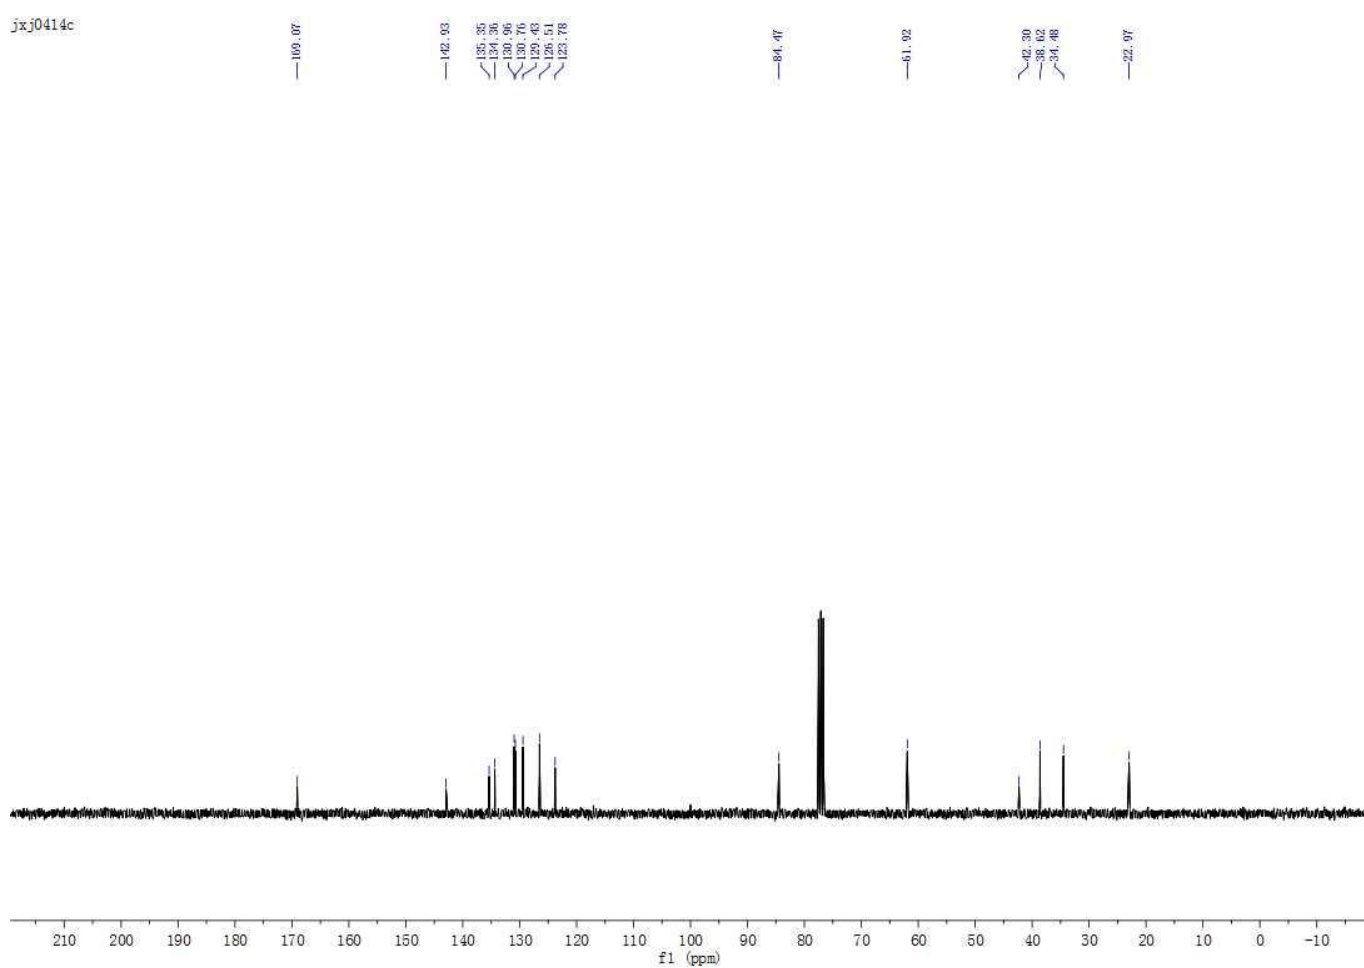



JXJ0603C

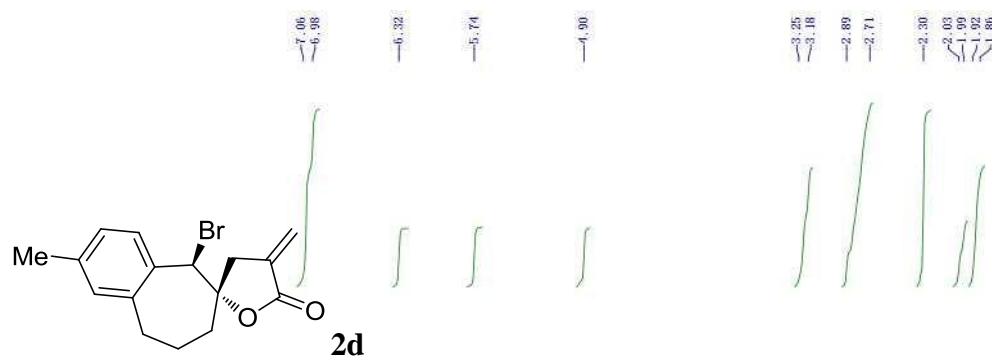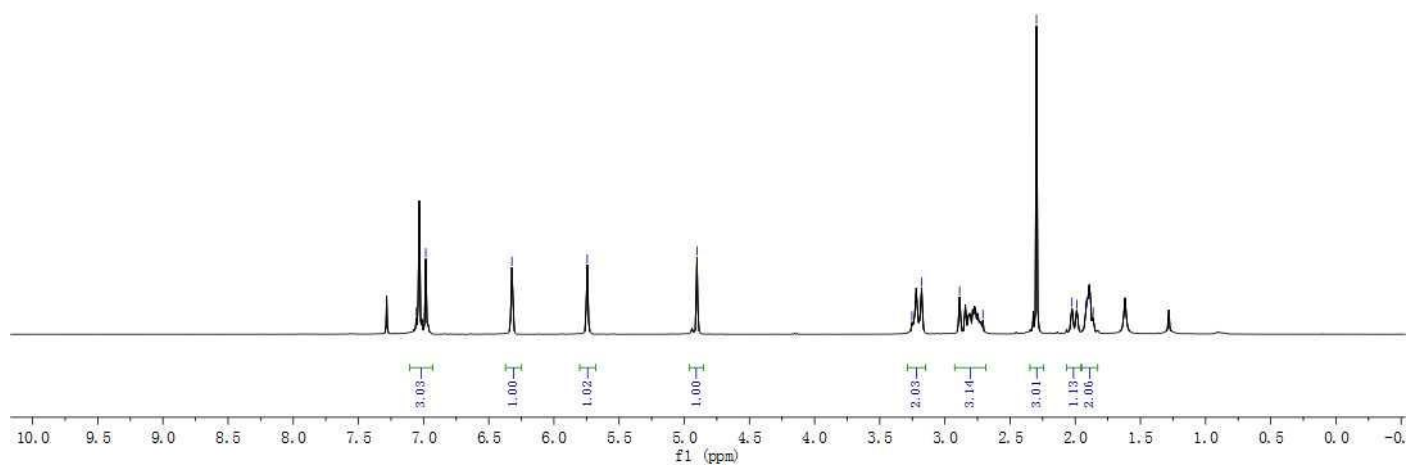

JXJ0603C

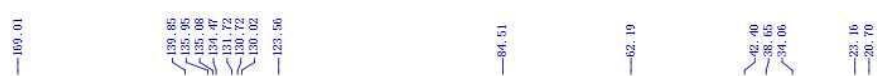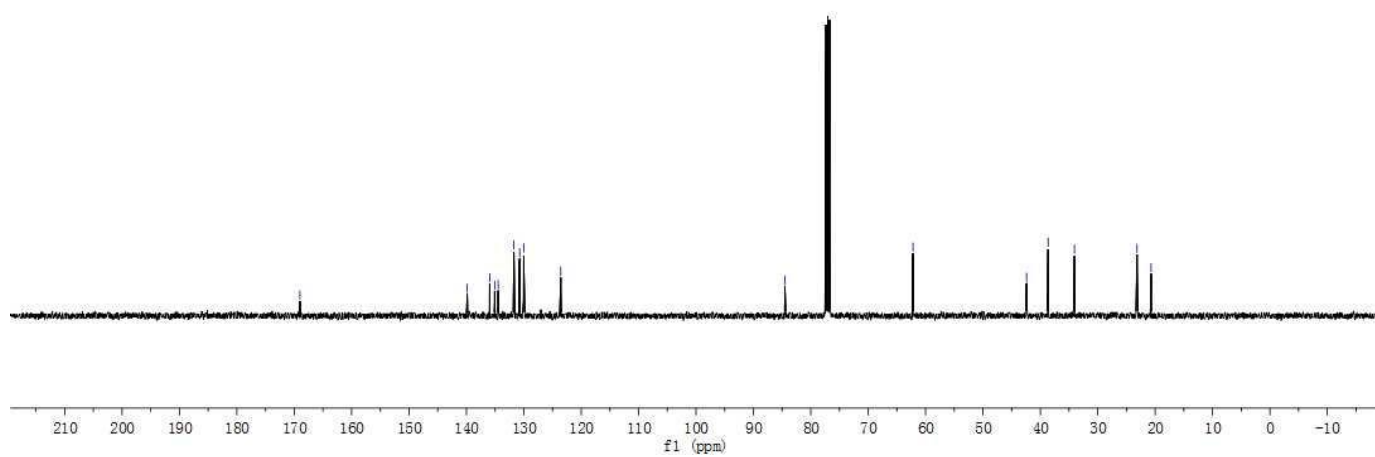

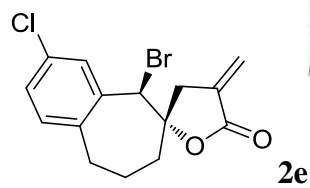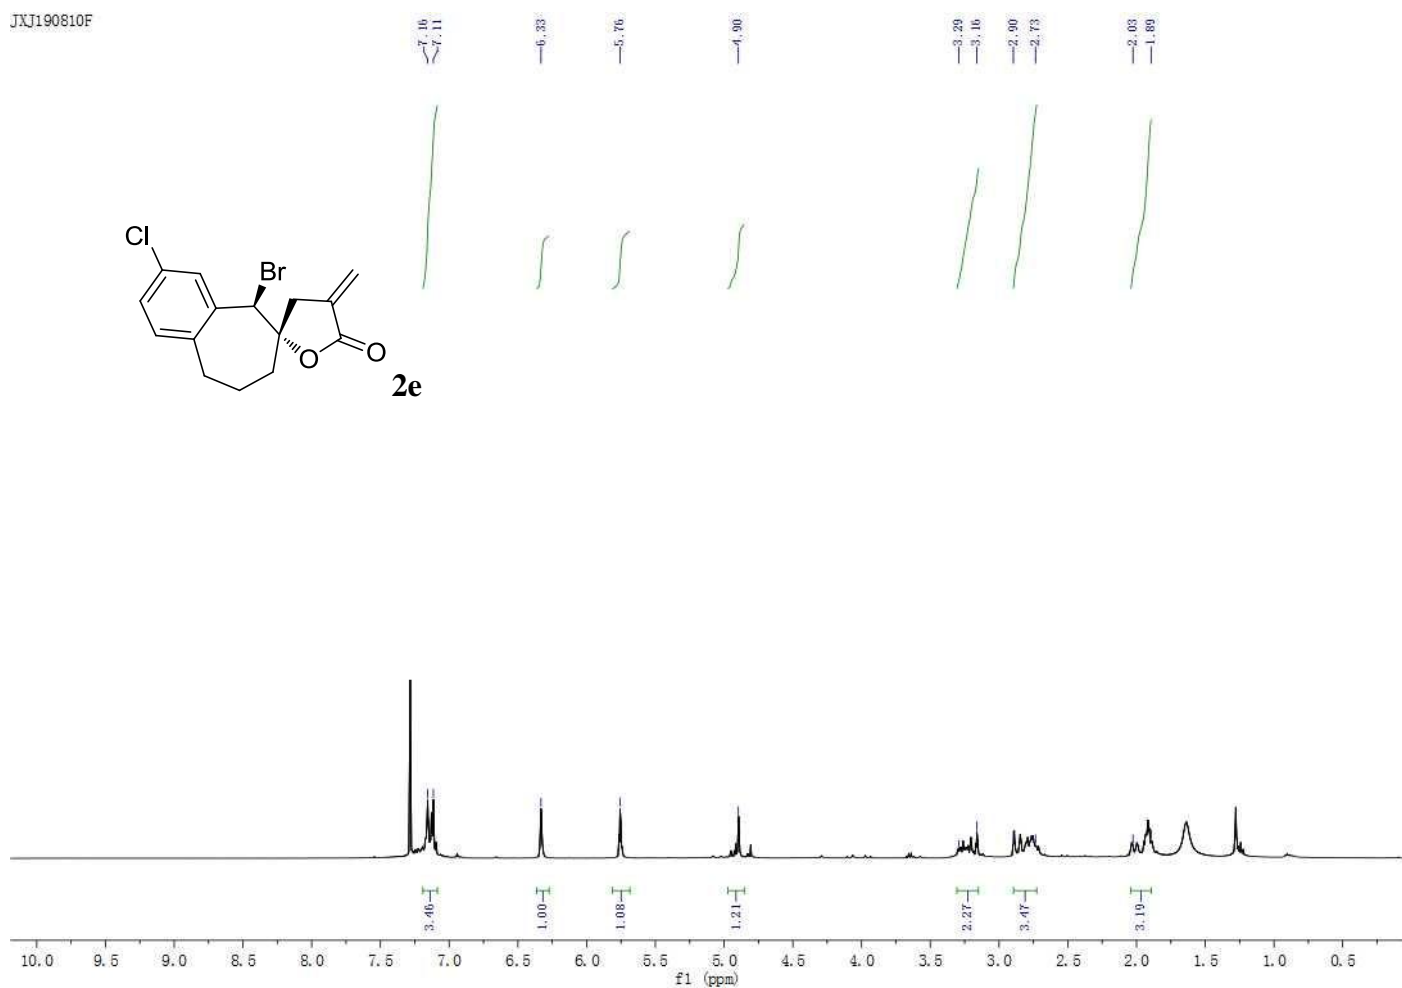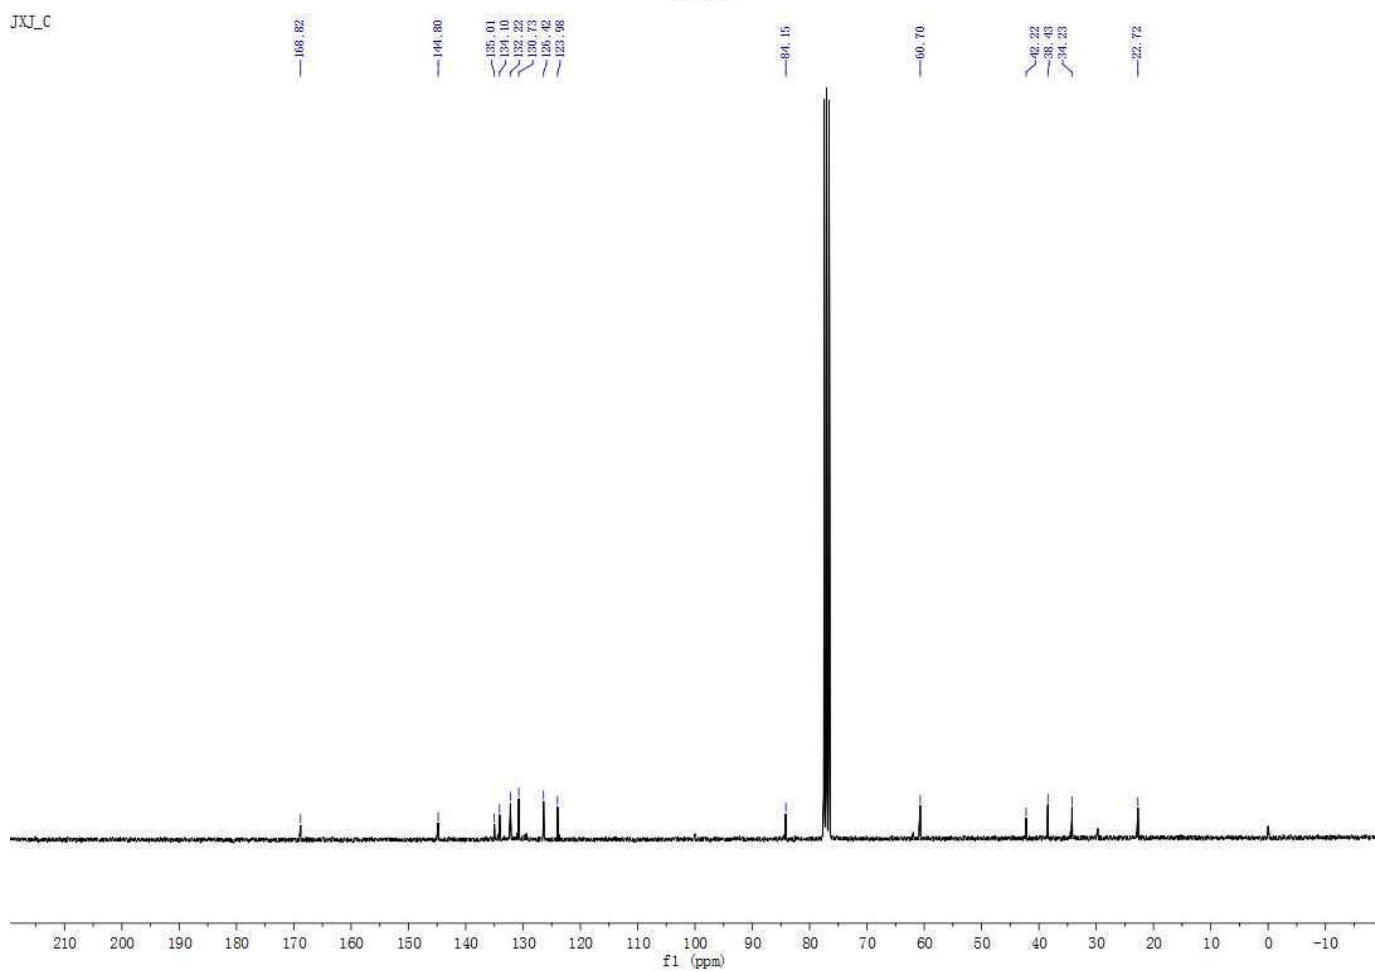

JXJ190810G

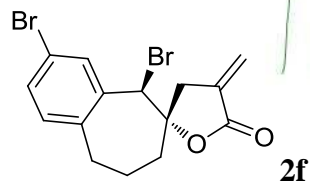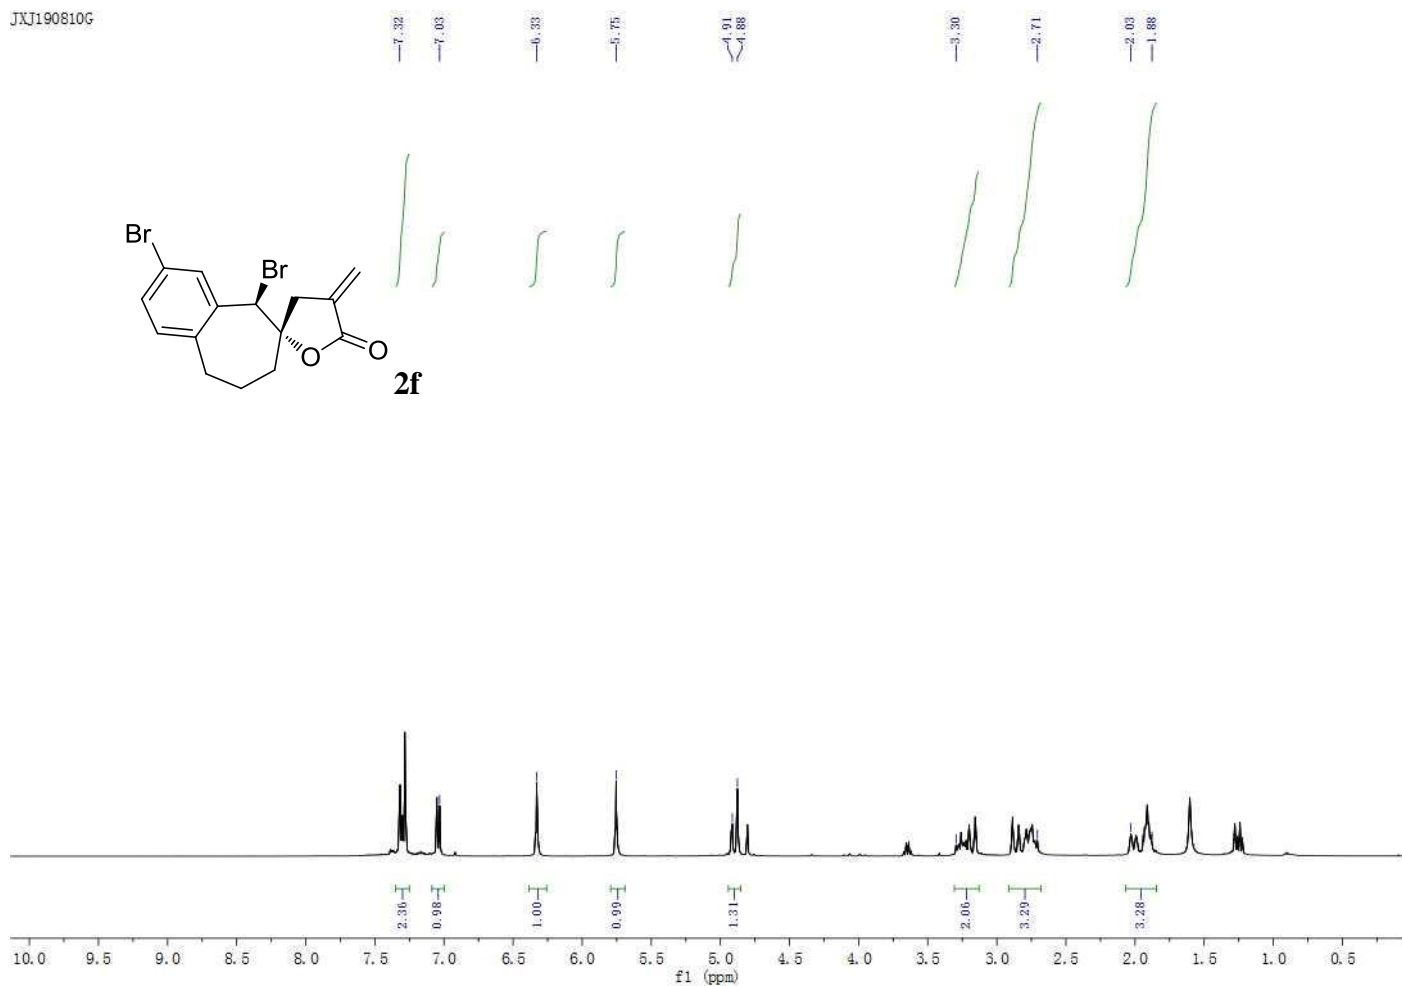

JXJ190810G

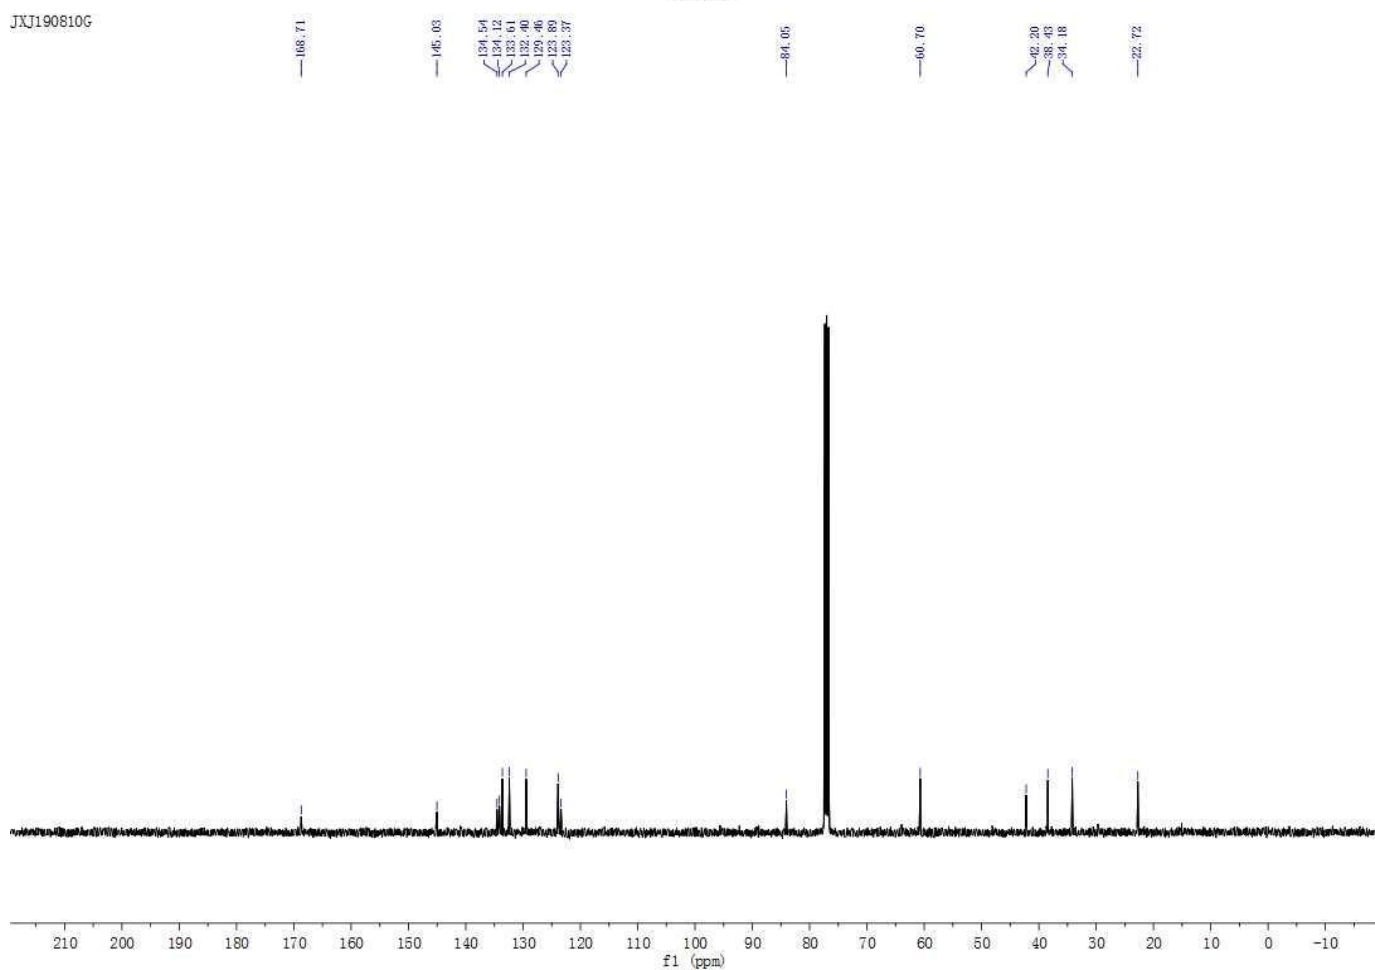

JXJ190810E

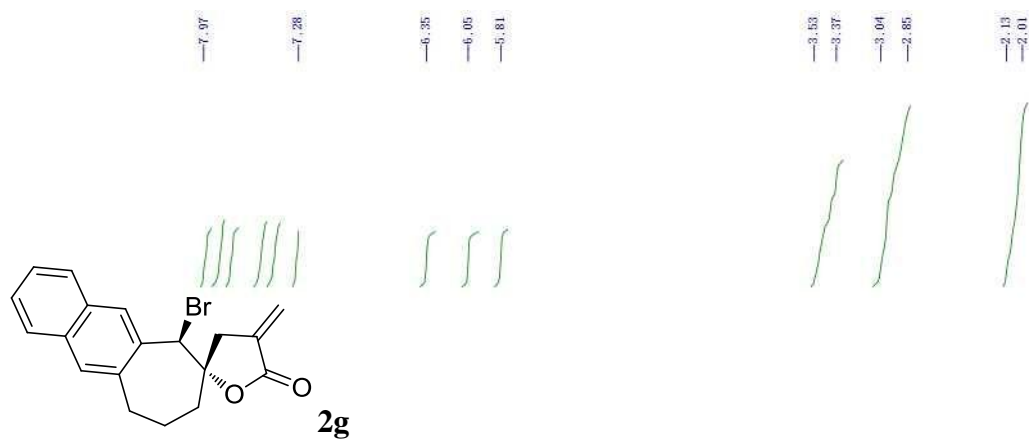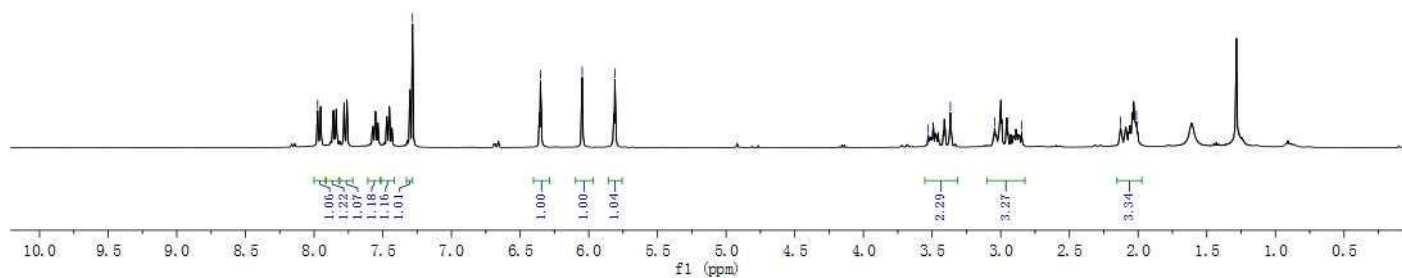

JXJ190810E

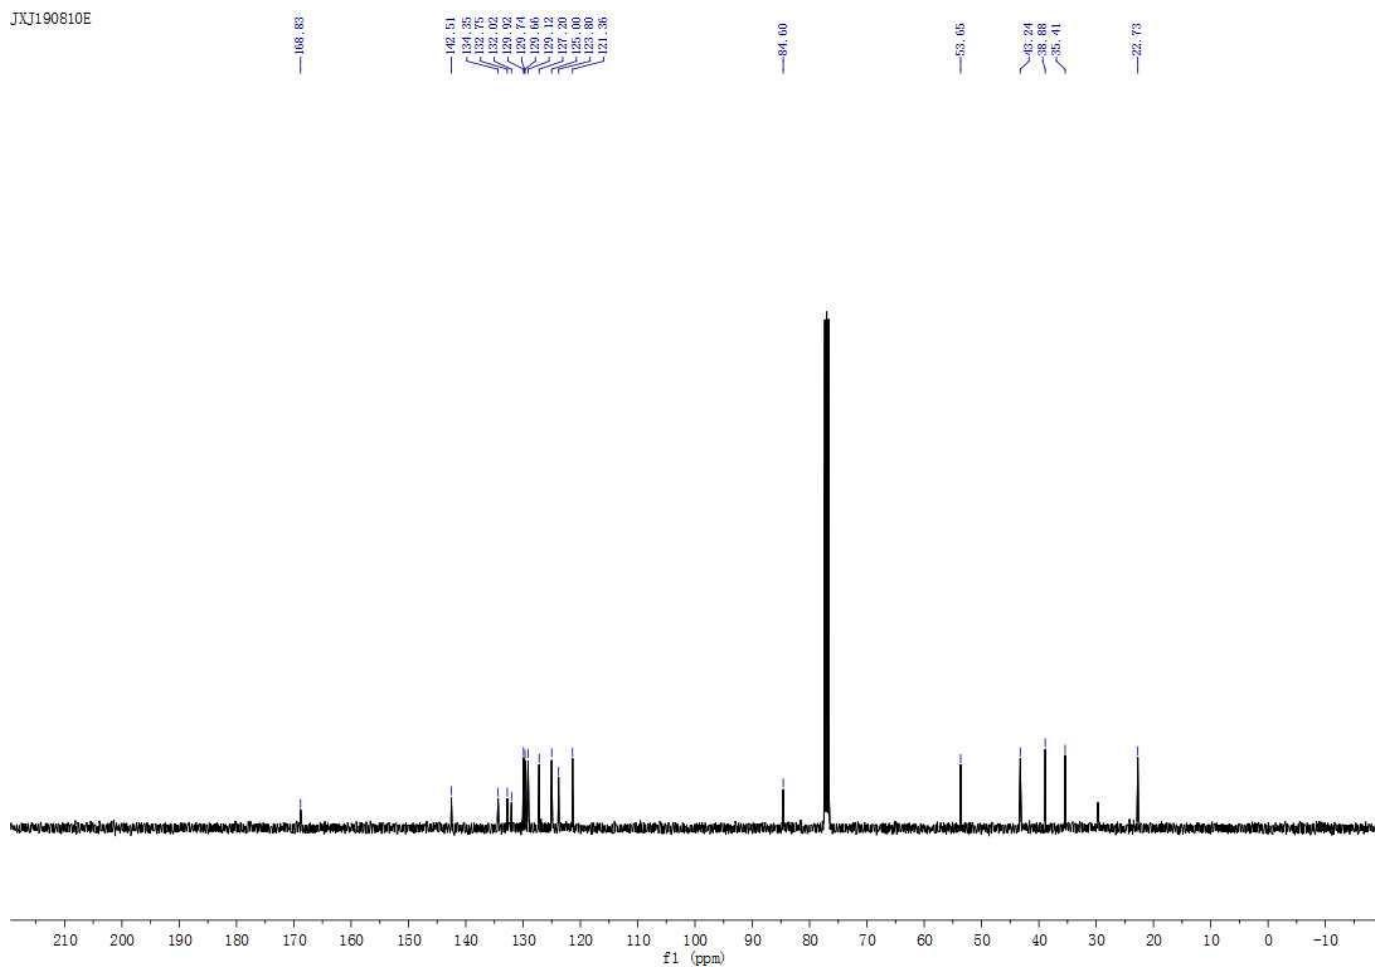

JXJ190810D

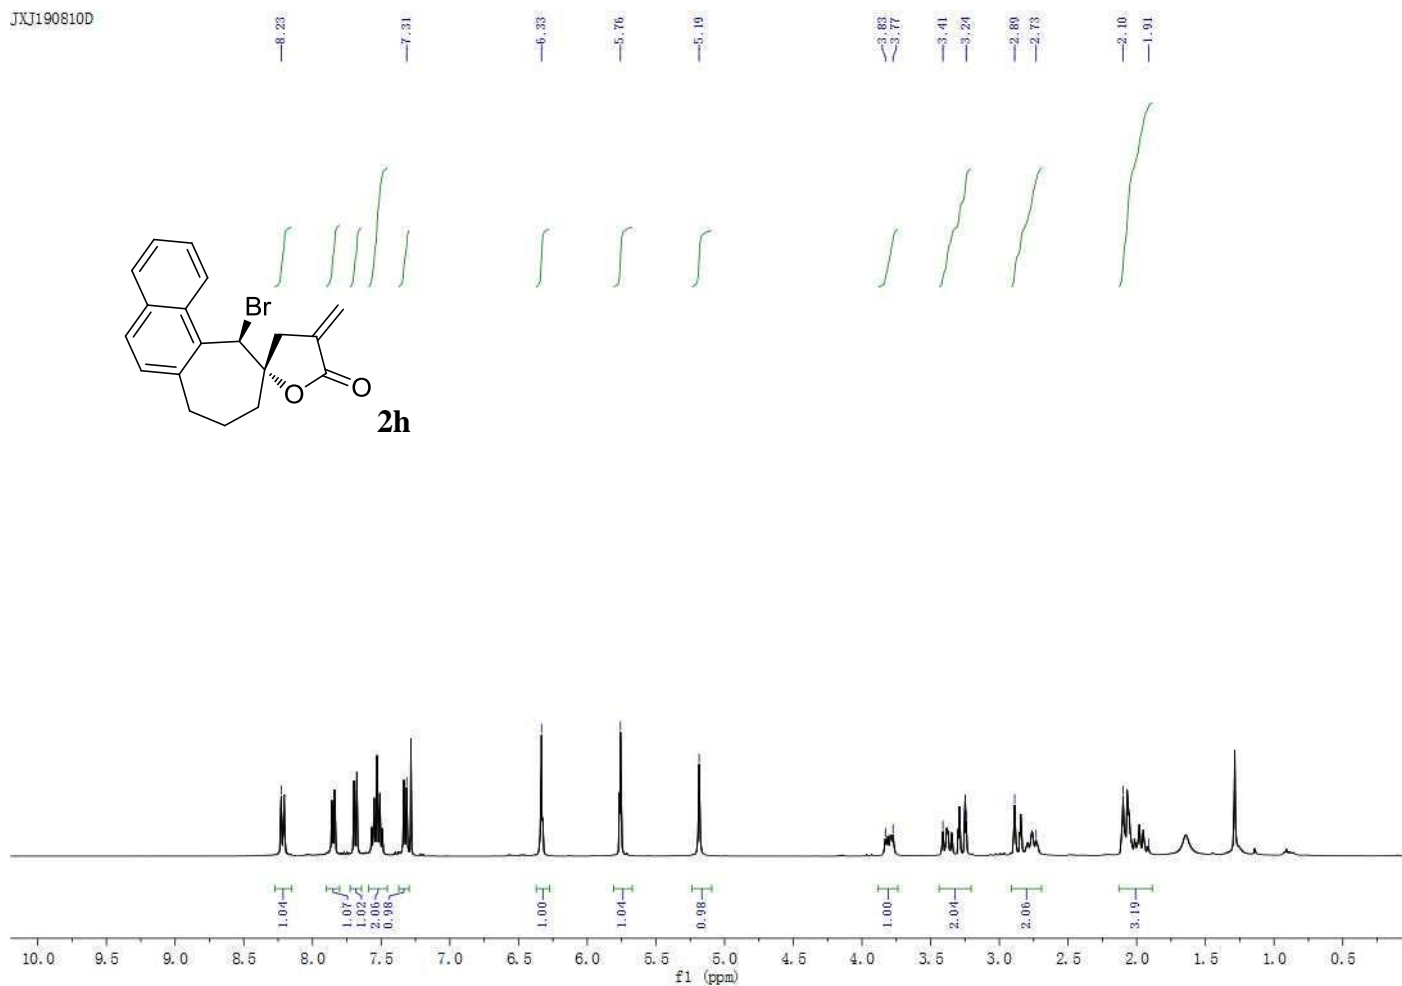

JXJ190810D

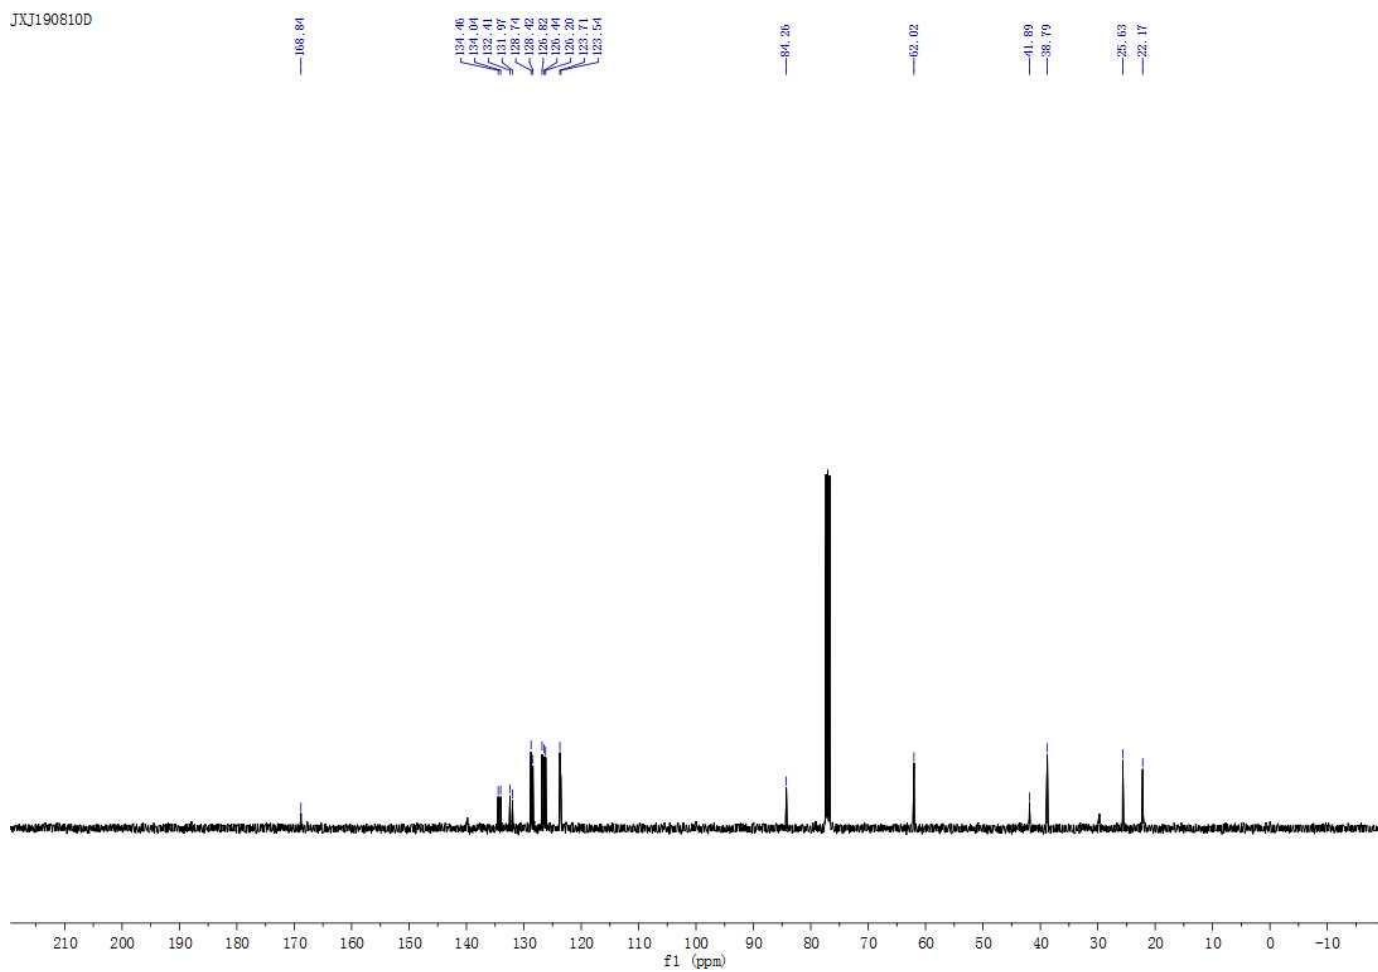

jxj0518a

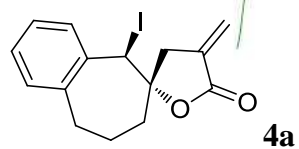7.24  
7.11

6.31

5.75

5.25

3.19  
3.10  
2.93  
2.892.07  
2.03  
1.96  
1.90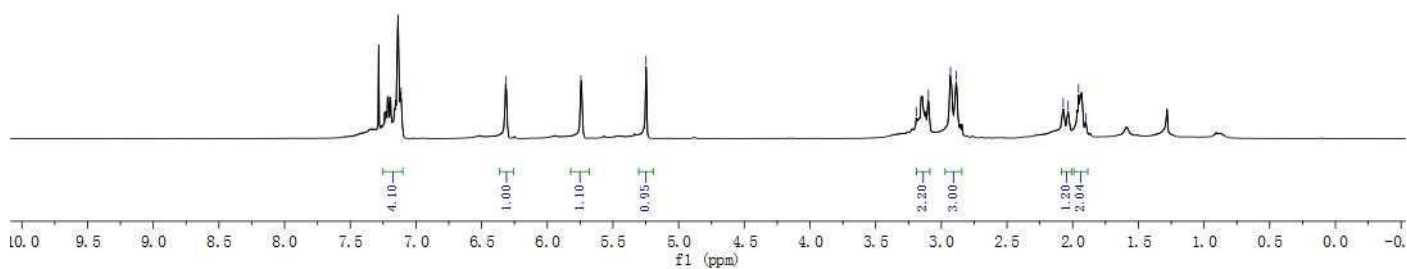

jxj0518a

169.12

142.95

137.24

134.84

130.91

129.81

128.02

126.11

123.55

84.34

43.85

42.14

39.66

34.86

22.72

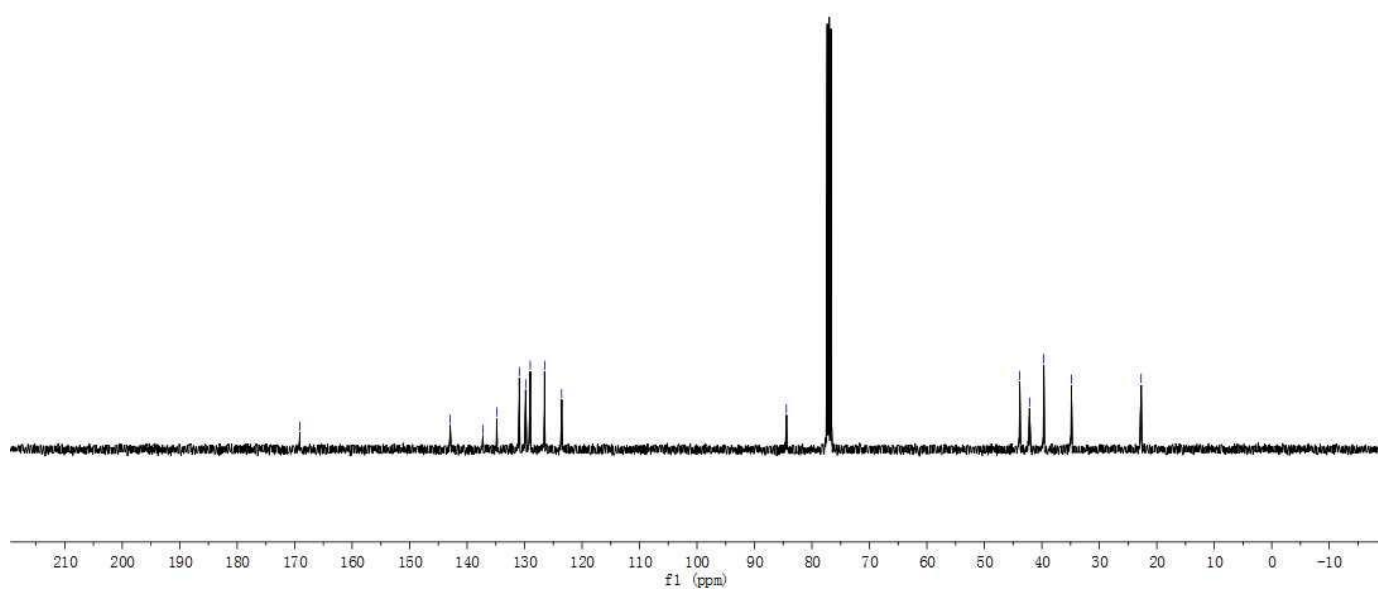

WW0727D

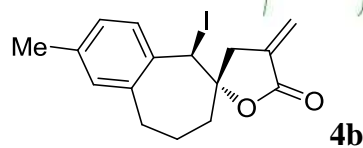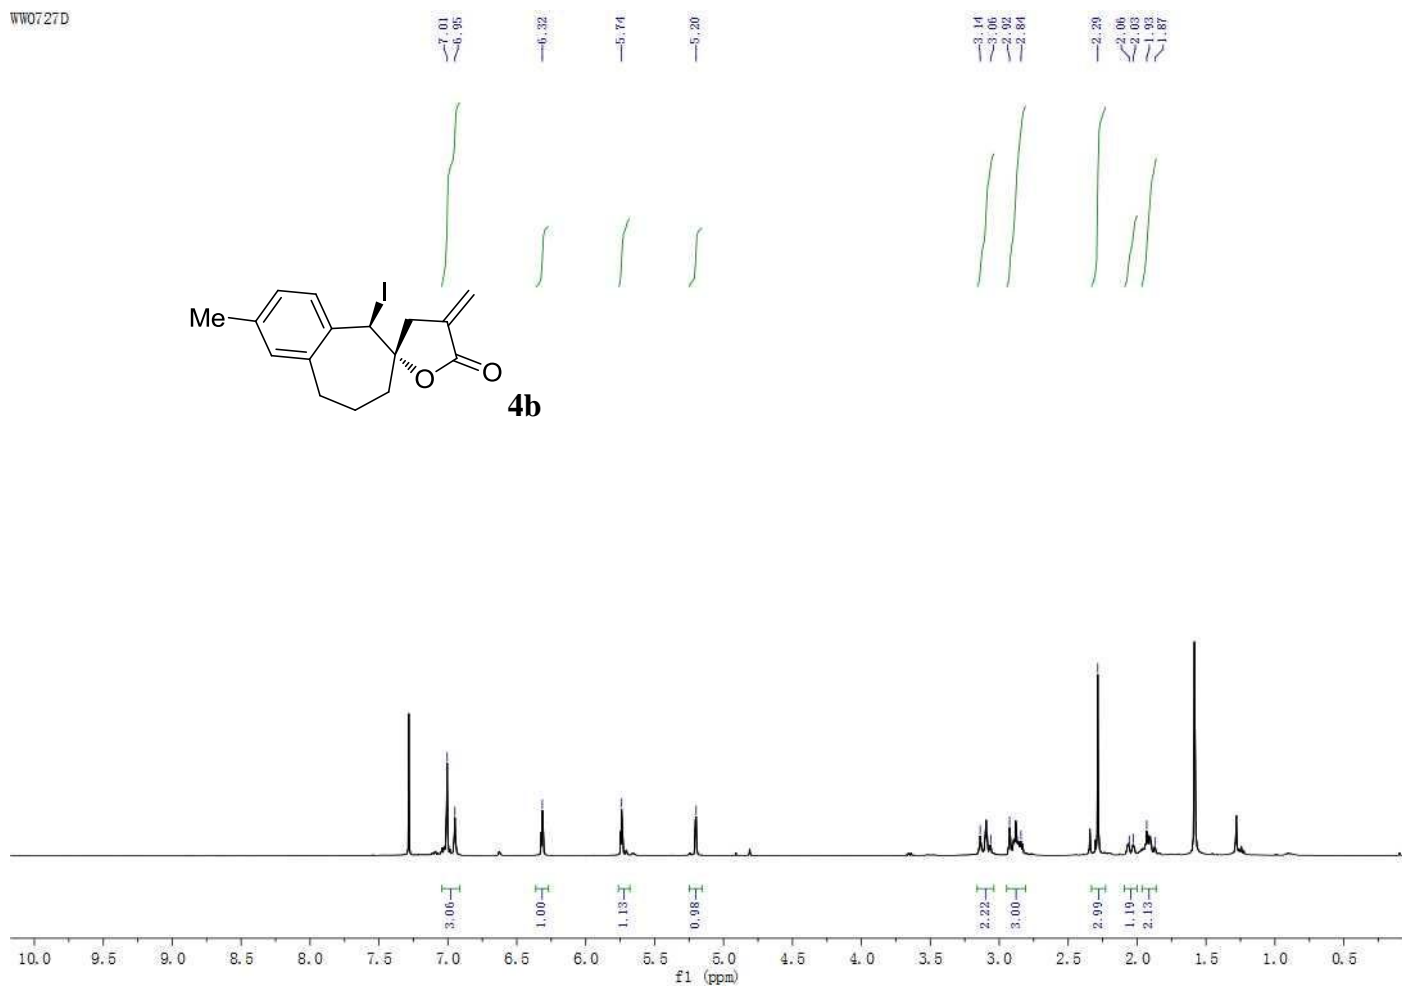

WW0727D

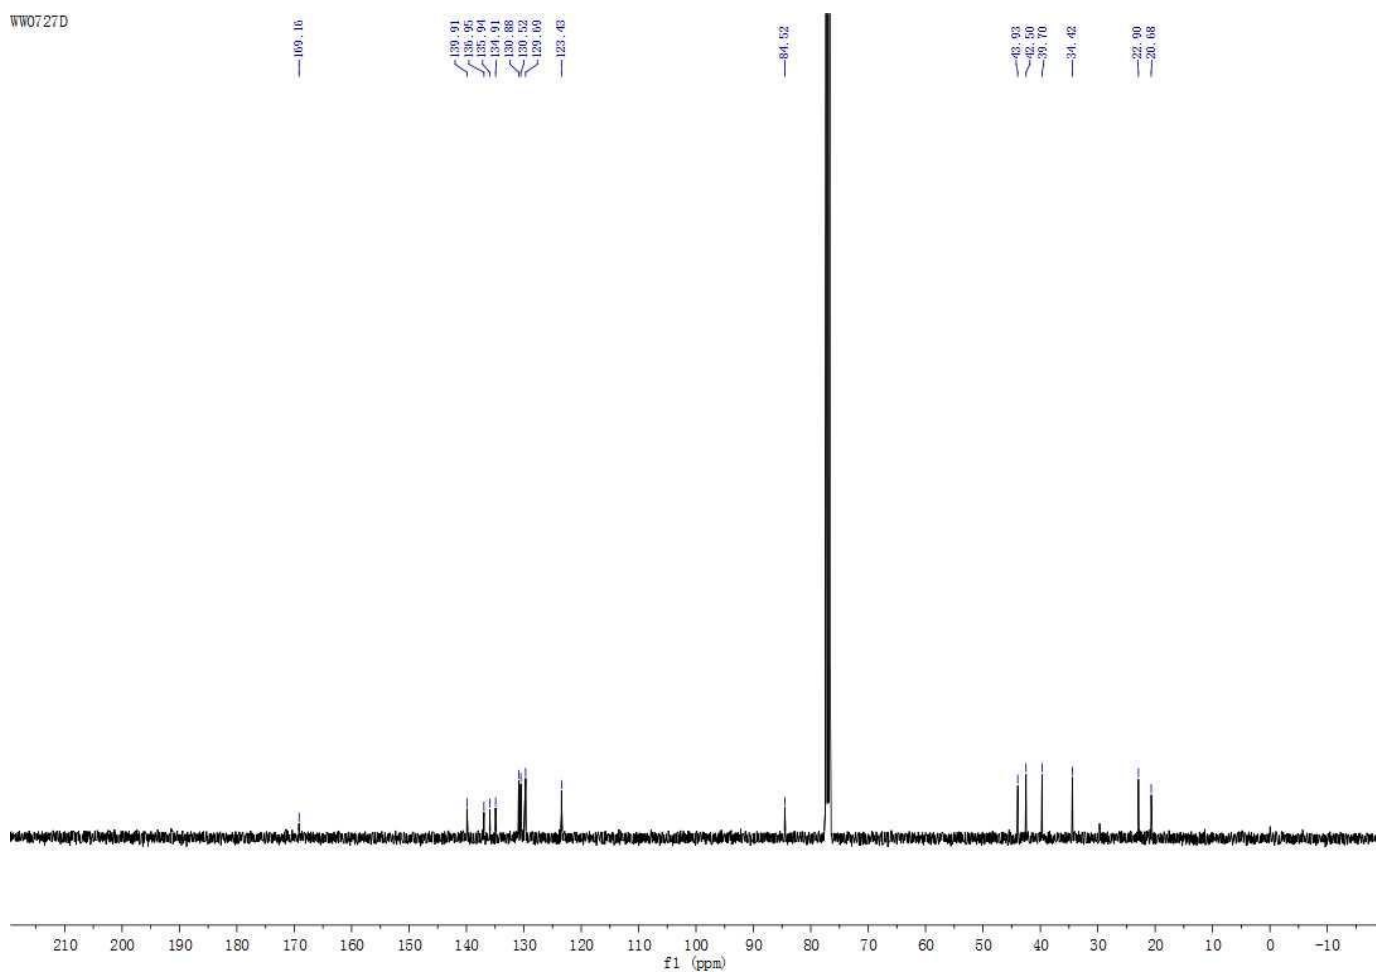

JXJ190528B

6.93, 6.92, 6.32, 5.74, 4.91, 3.22, 3.17, 2.88, 2.84, 2.79, 2.71, 2.22, 2.20, 2.02, 1.95, 1.92, 1.85

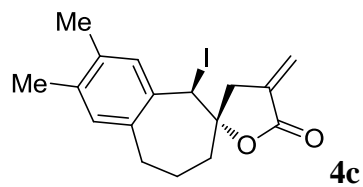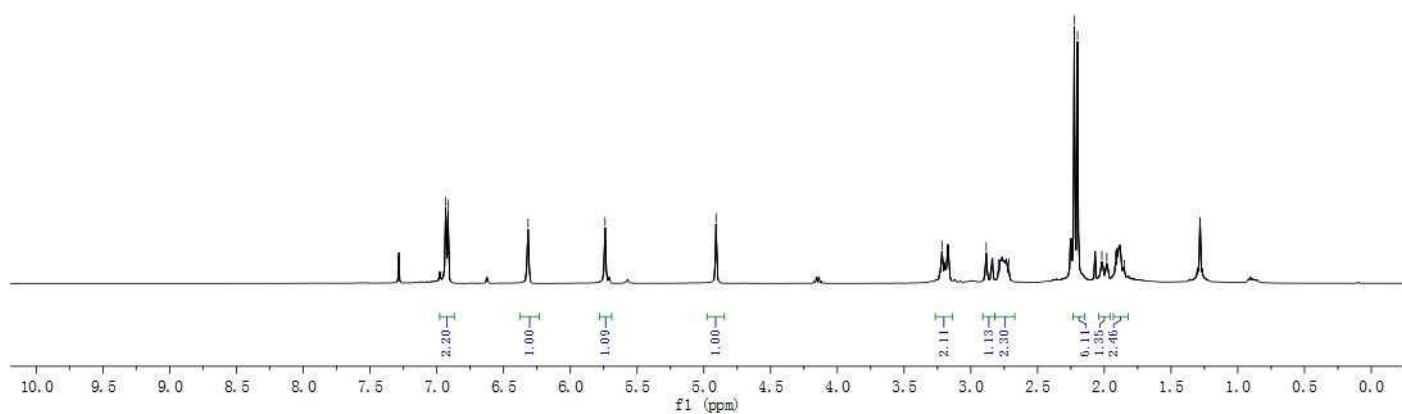

JXJ190528B

169.09, 140.16, 137.91, 134.51, 134.37, 132.86, 132.38, 132.34, 123.59, 84.59, 62.35, 42.46, 38.64, 34.02, 23.26, 19.28, 19.04

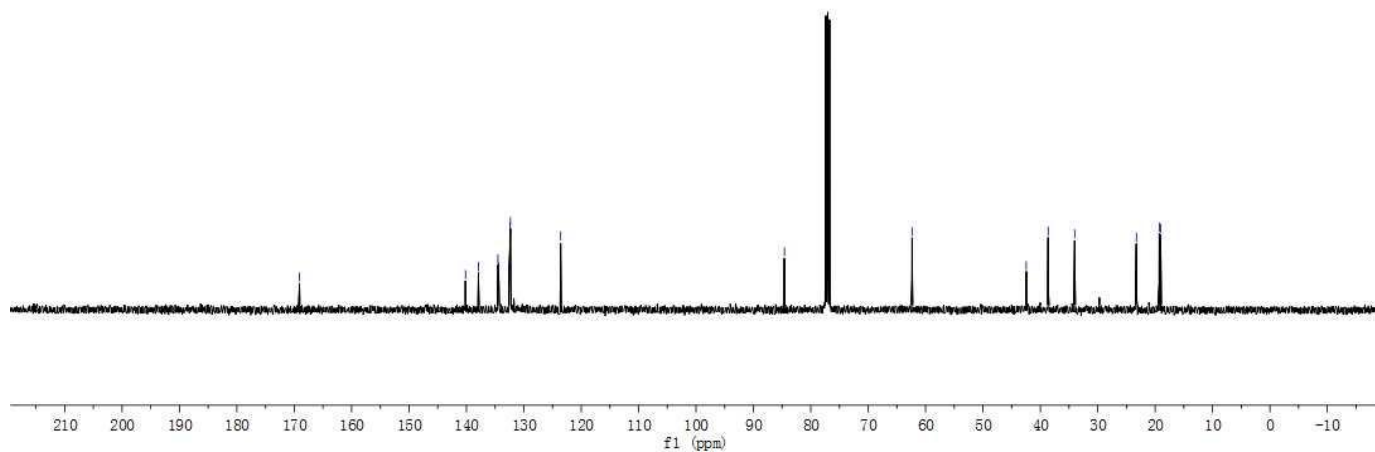



WW0720B

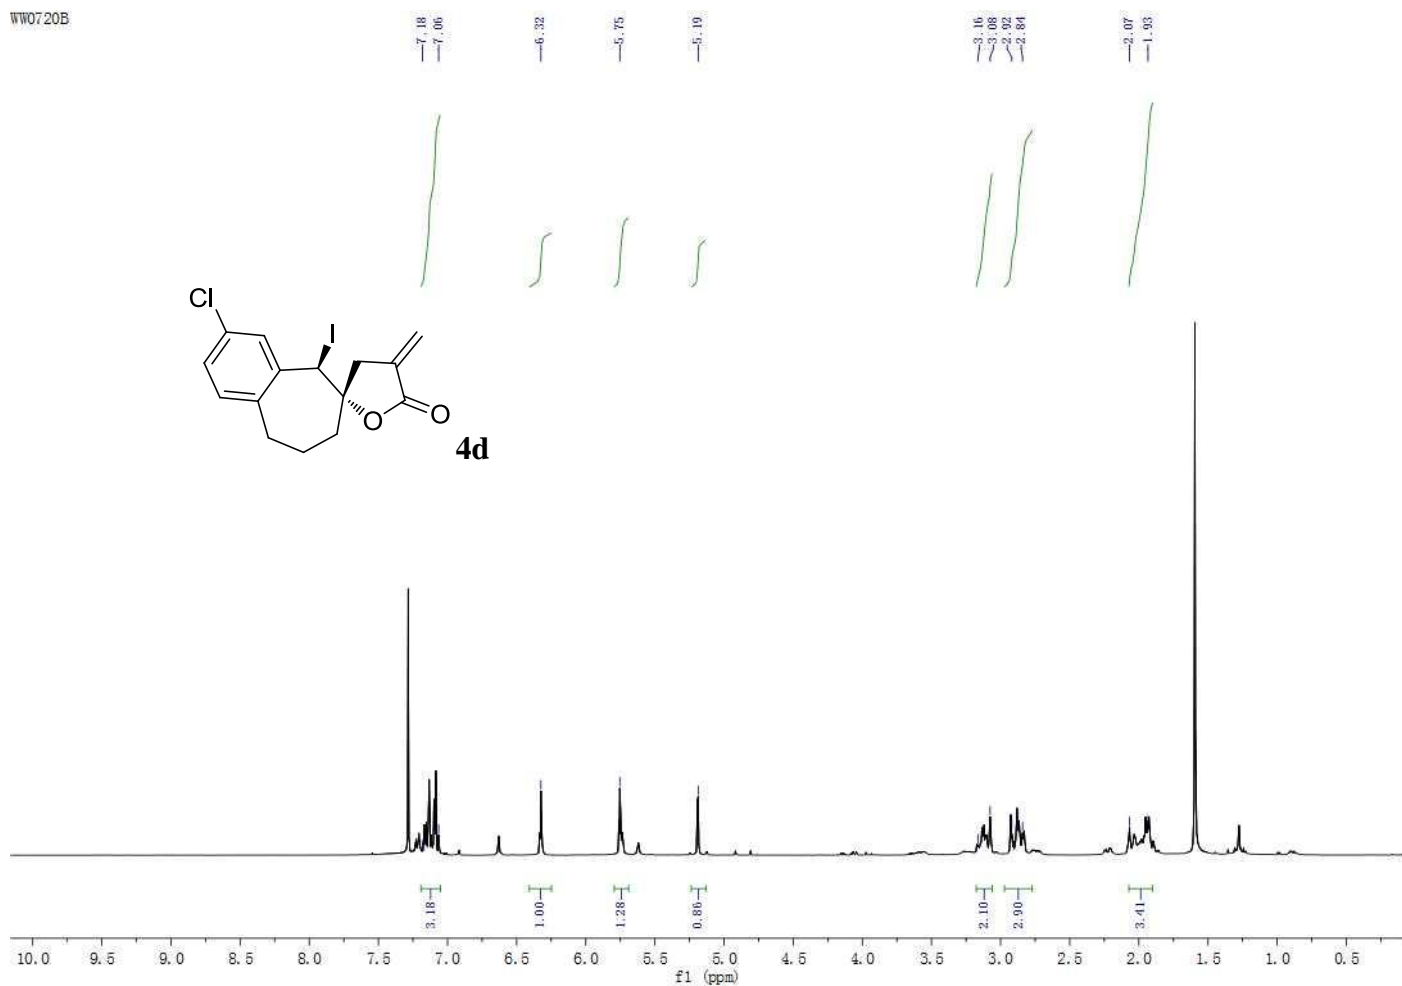

WW0720B

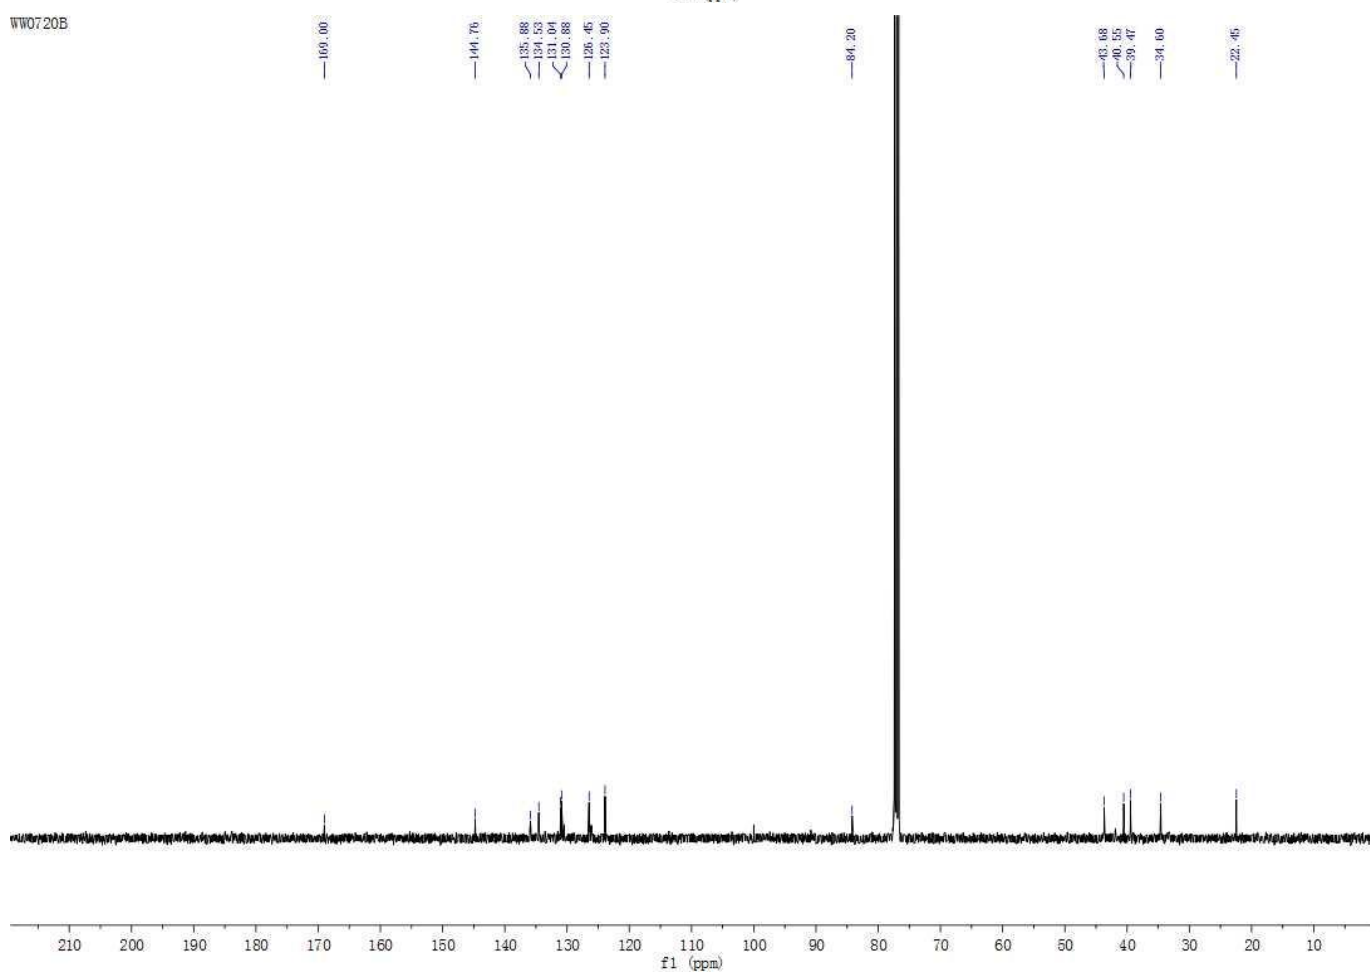

WW0720D

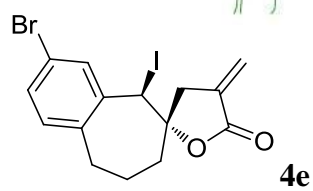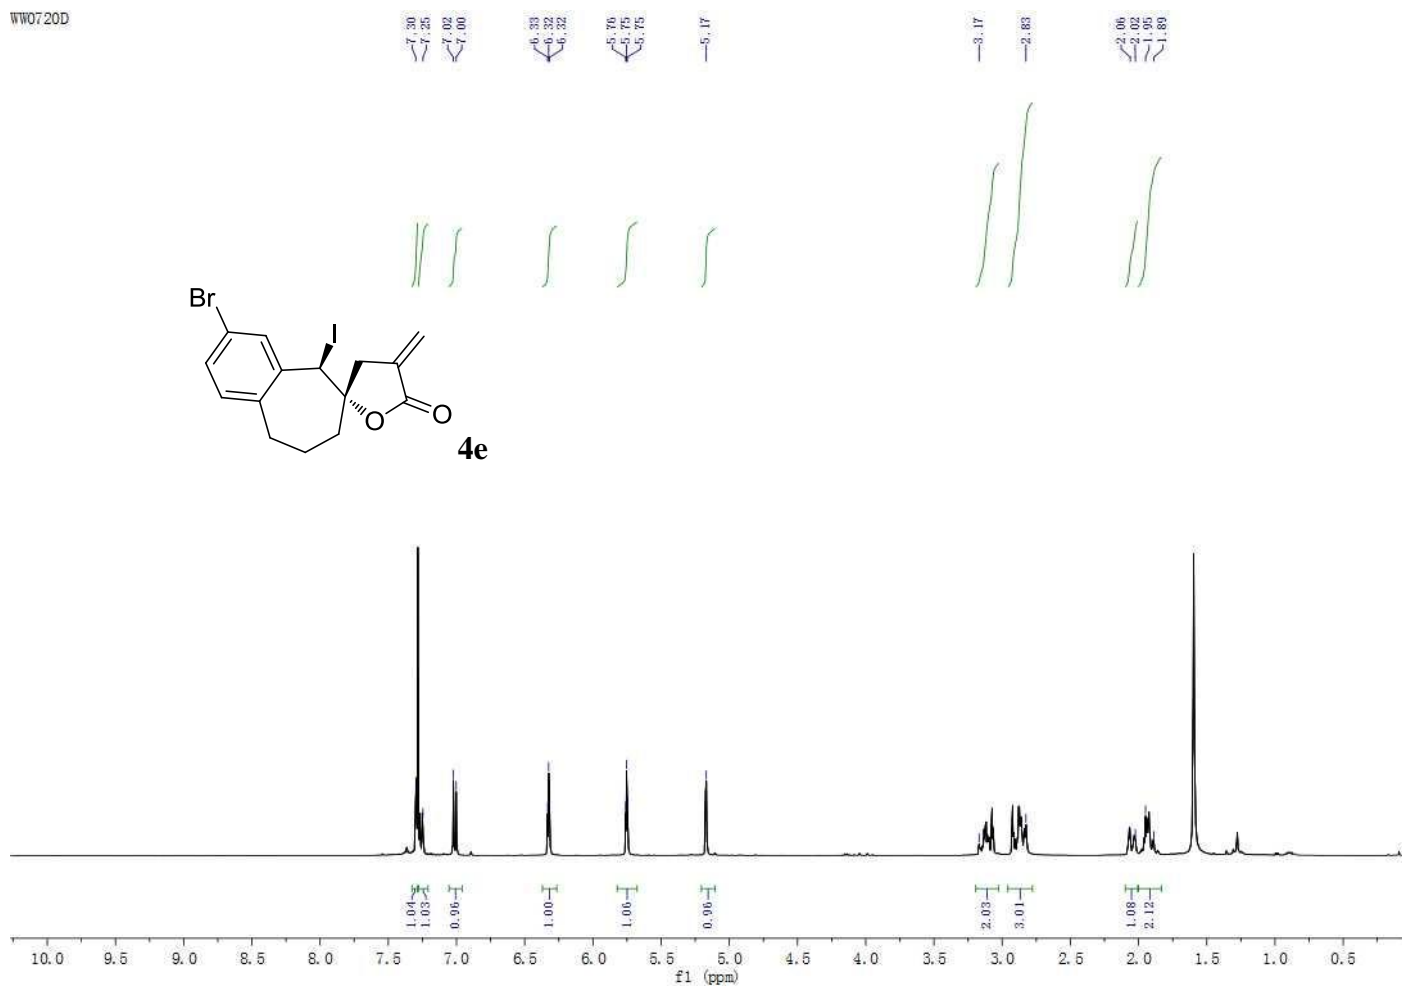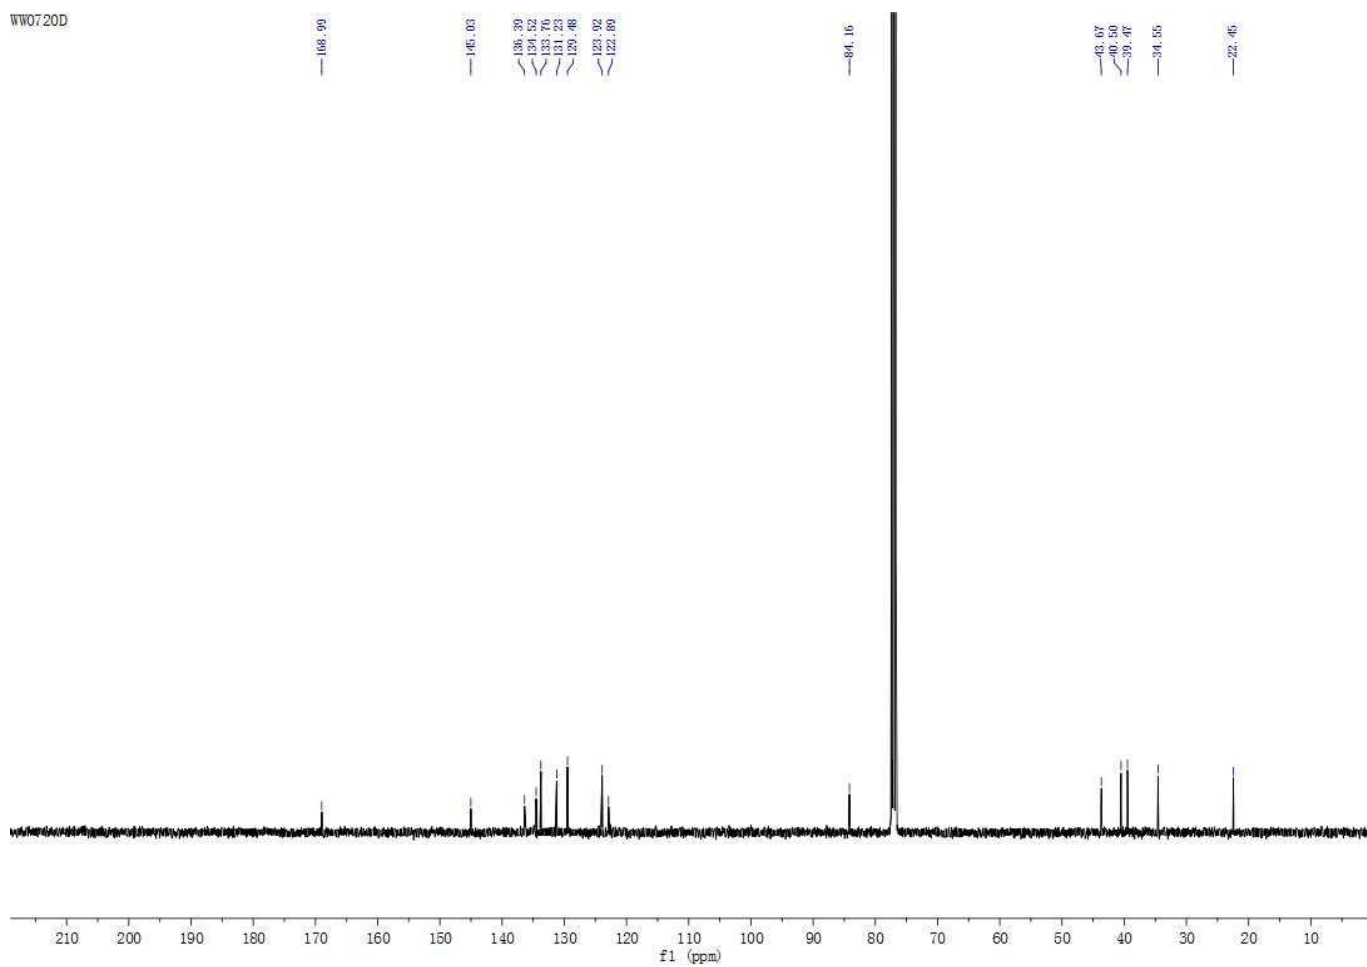

JXJ0825A

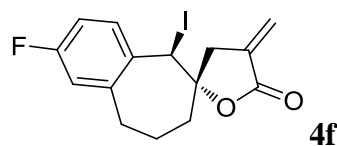

dr = 90:10

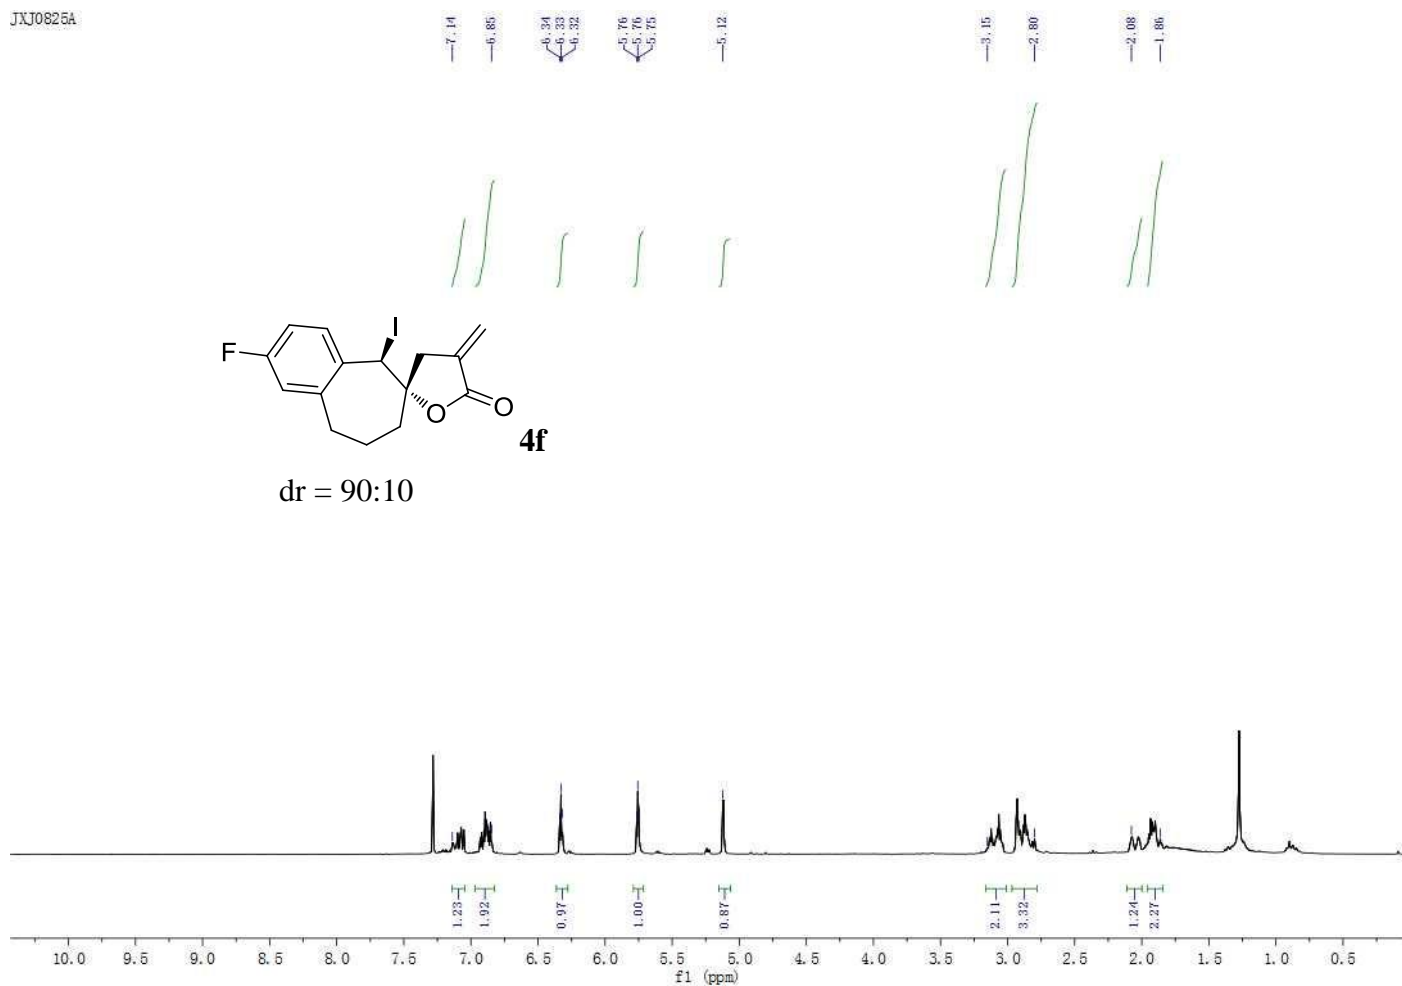

JXJ0825A

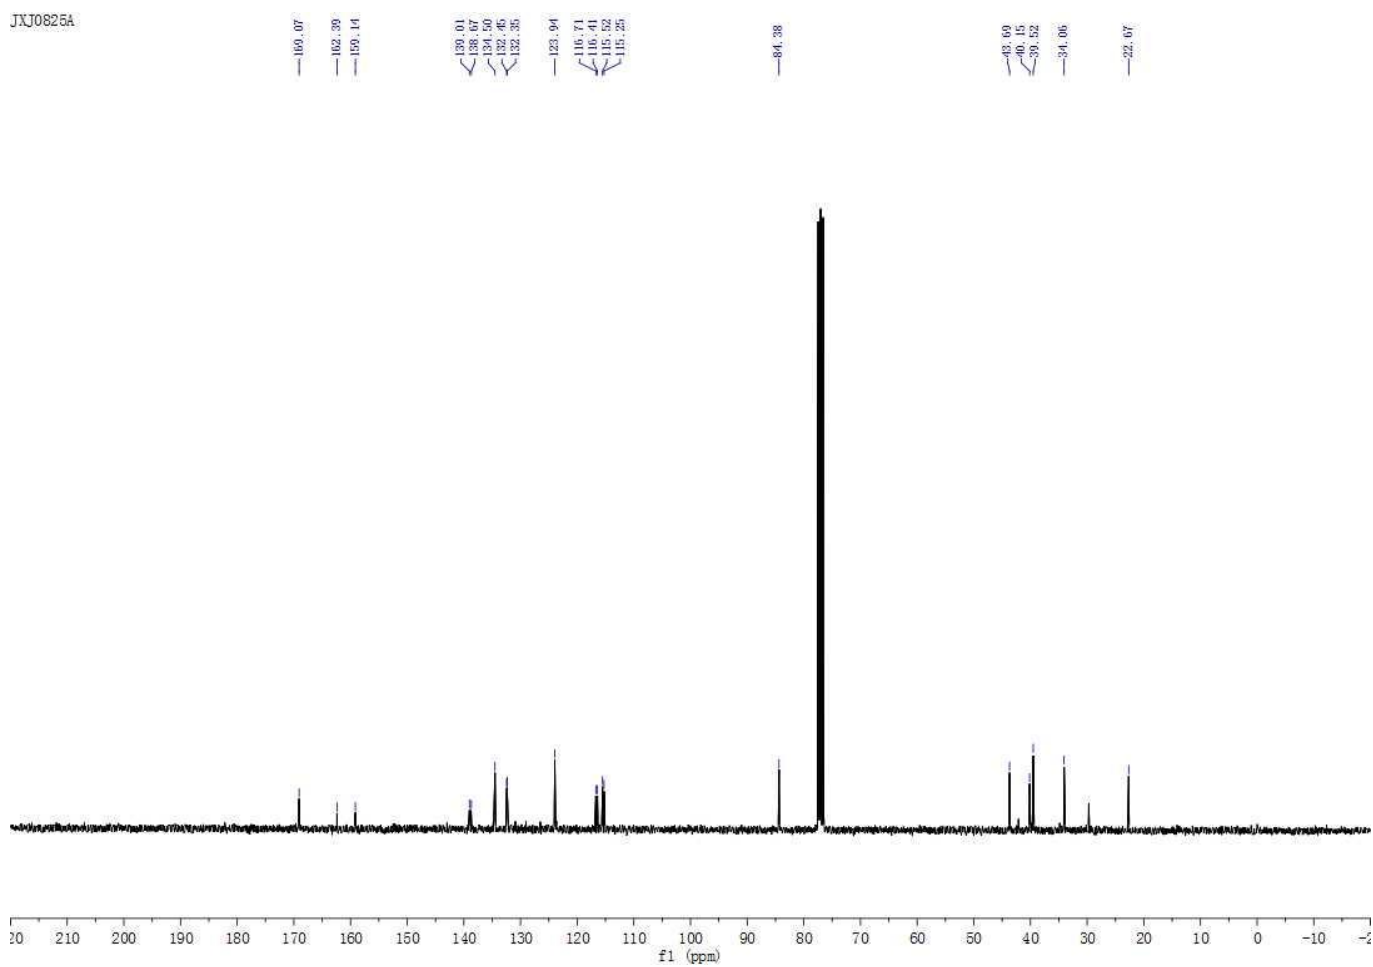

JXJ0727A

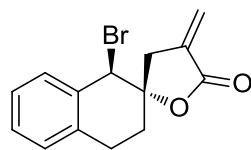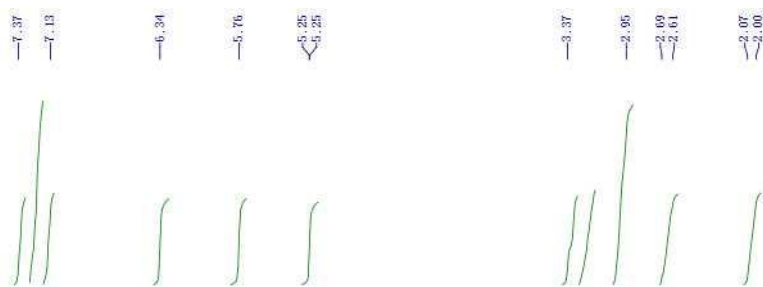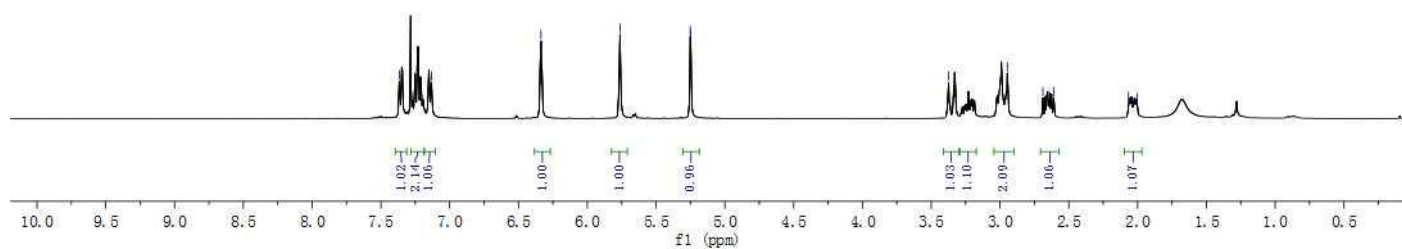

JXJ0727A

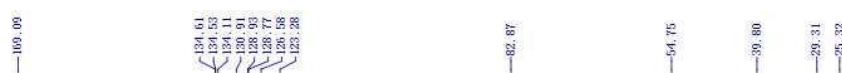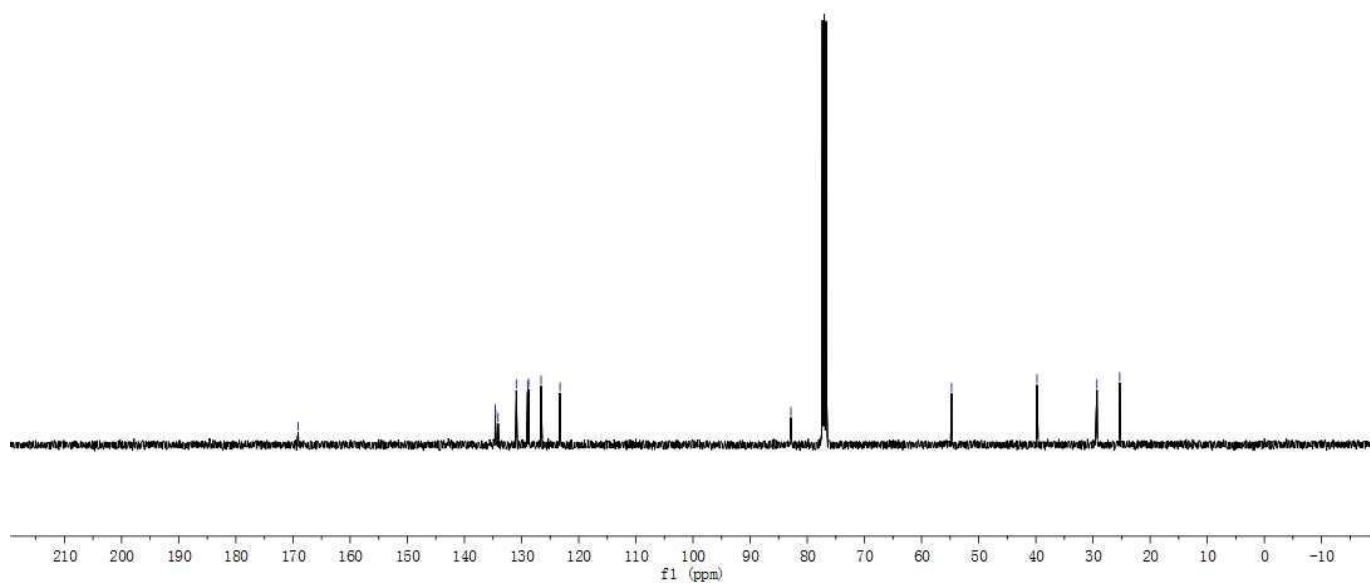

jxj0801a

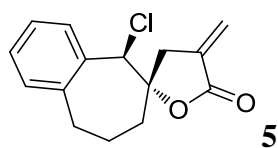

dr = 60:40

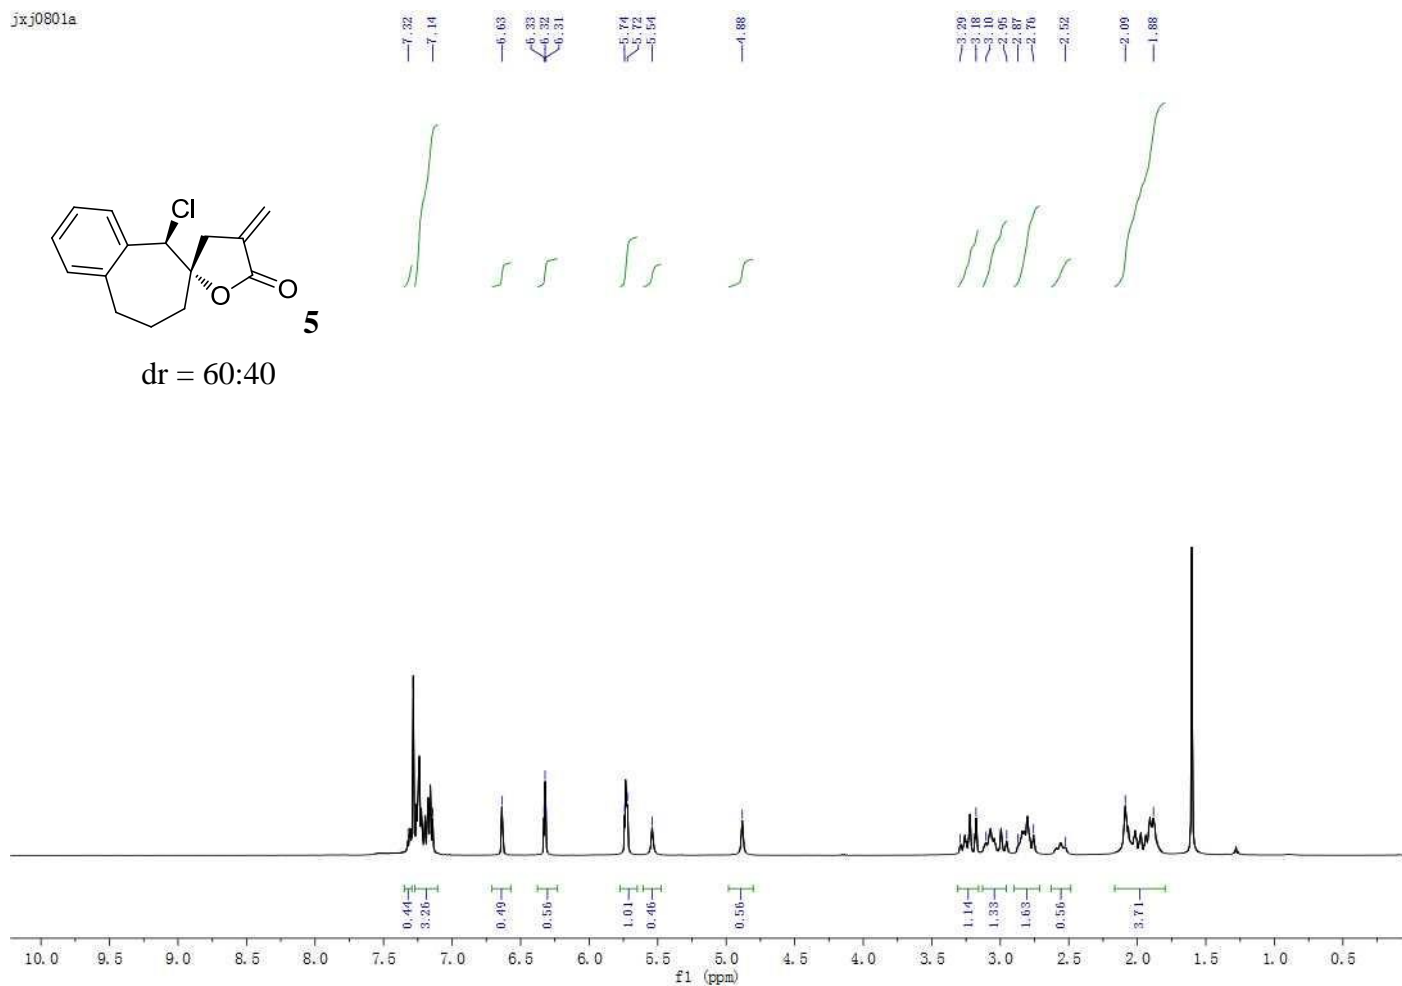

jxj0801a

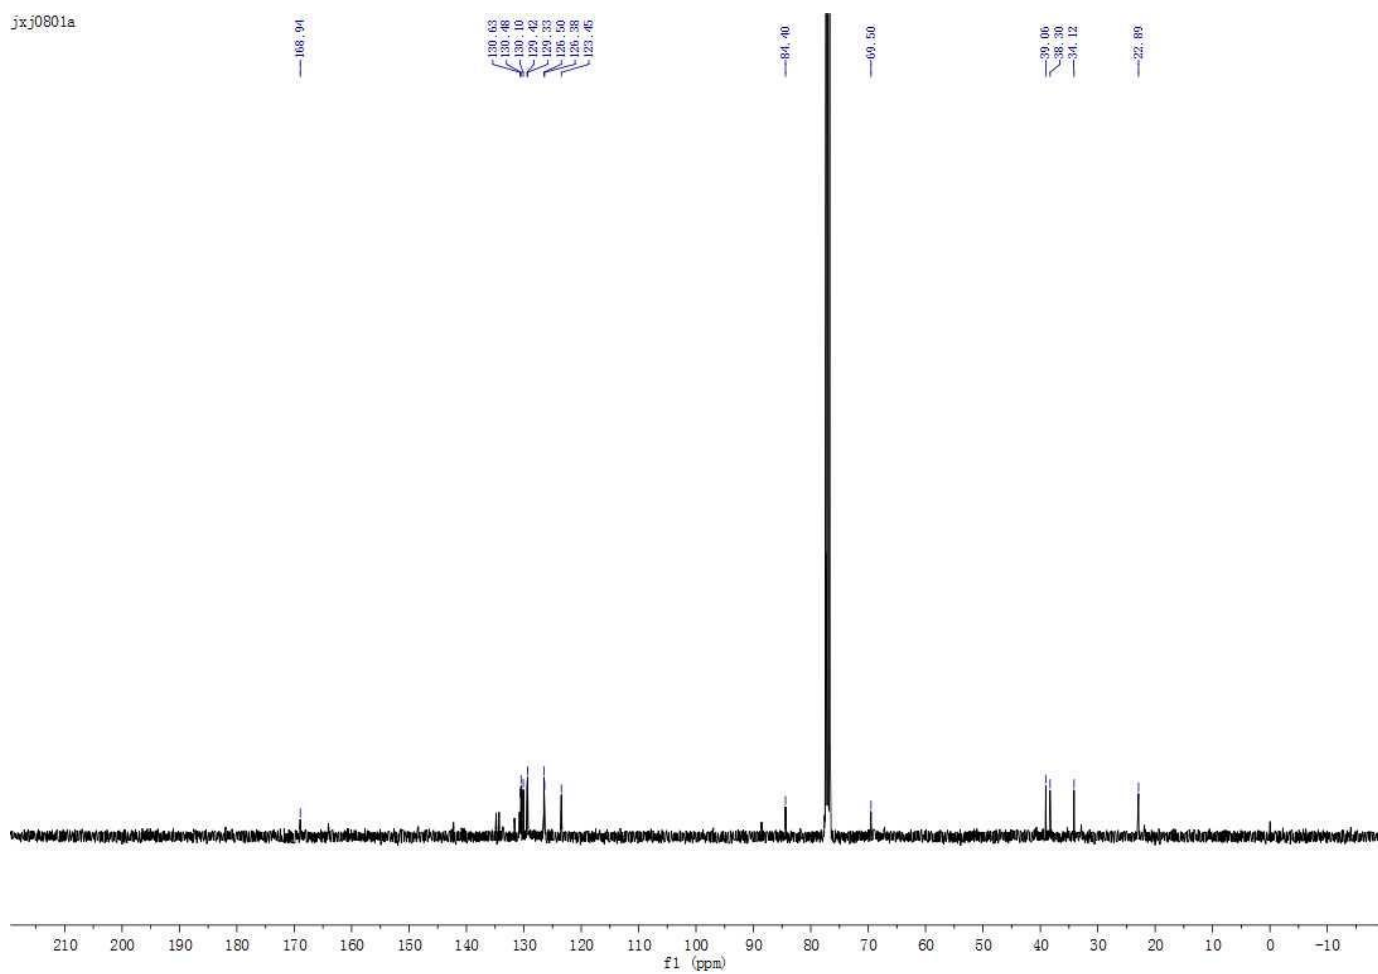

JXJ0707B

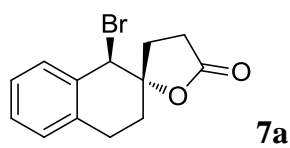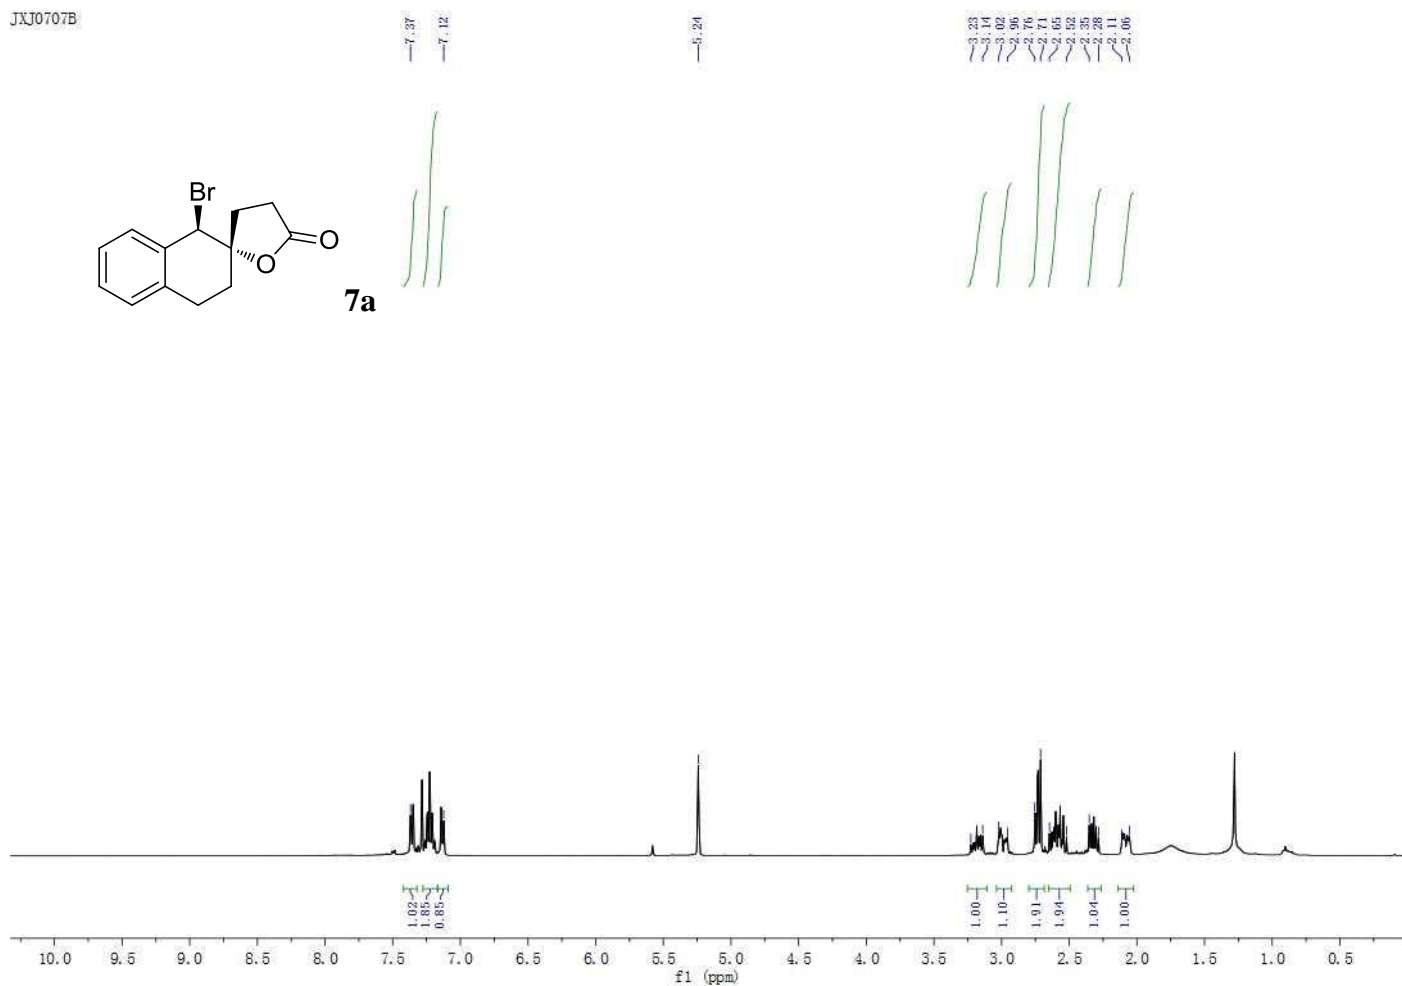

JXJ0707B

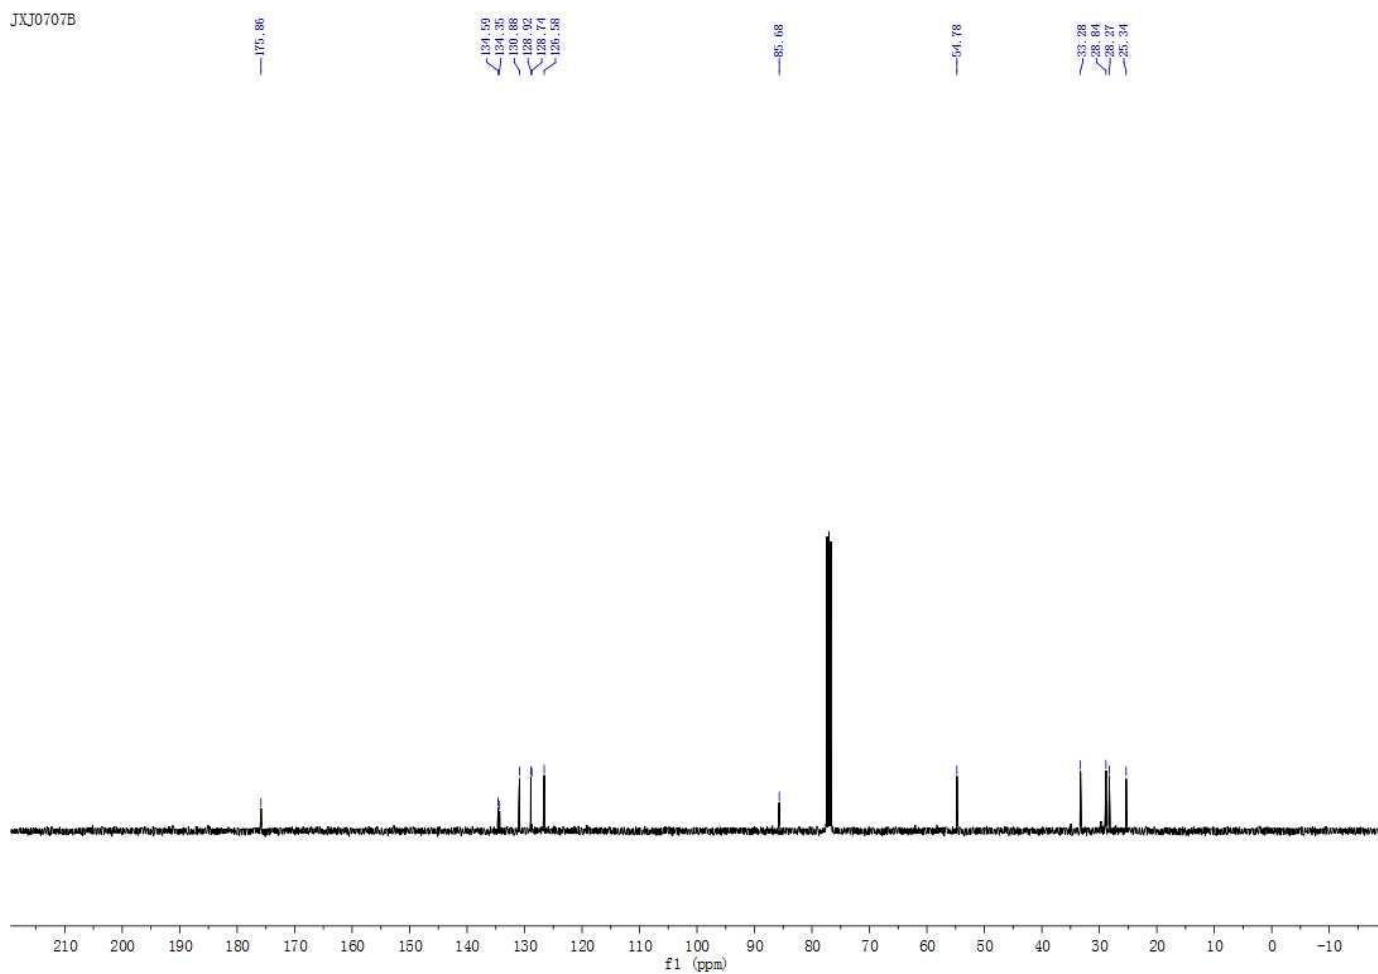

JXJ0629B

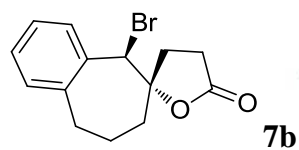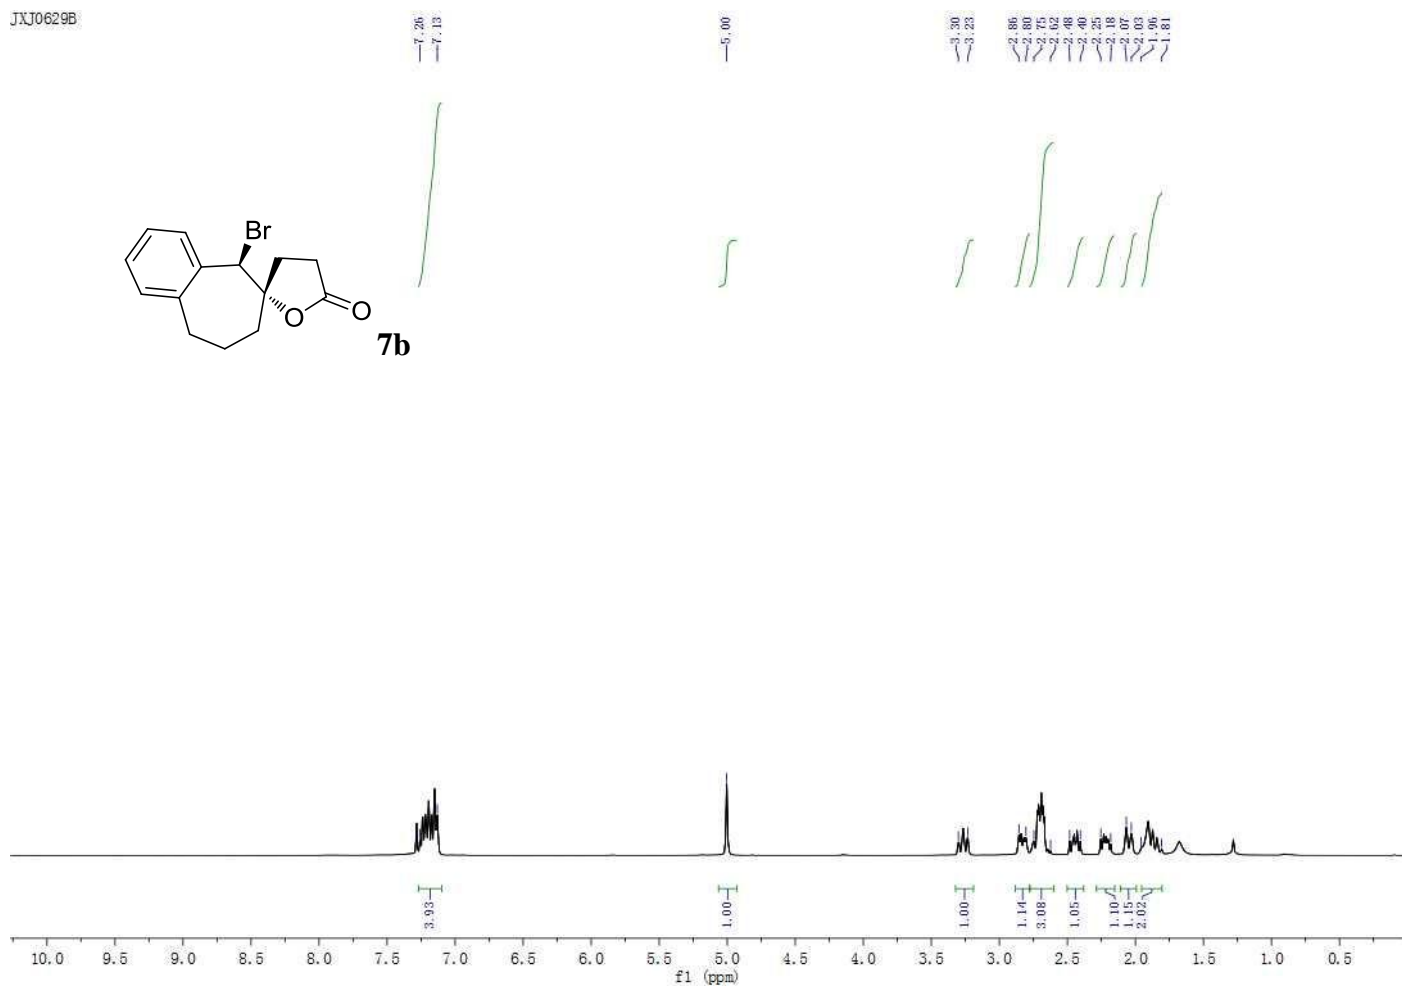

JXJ0629B

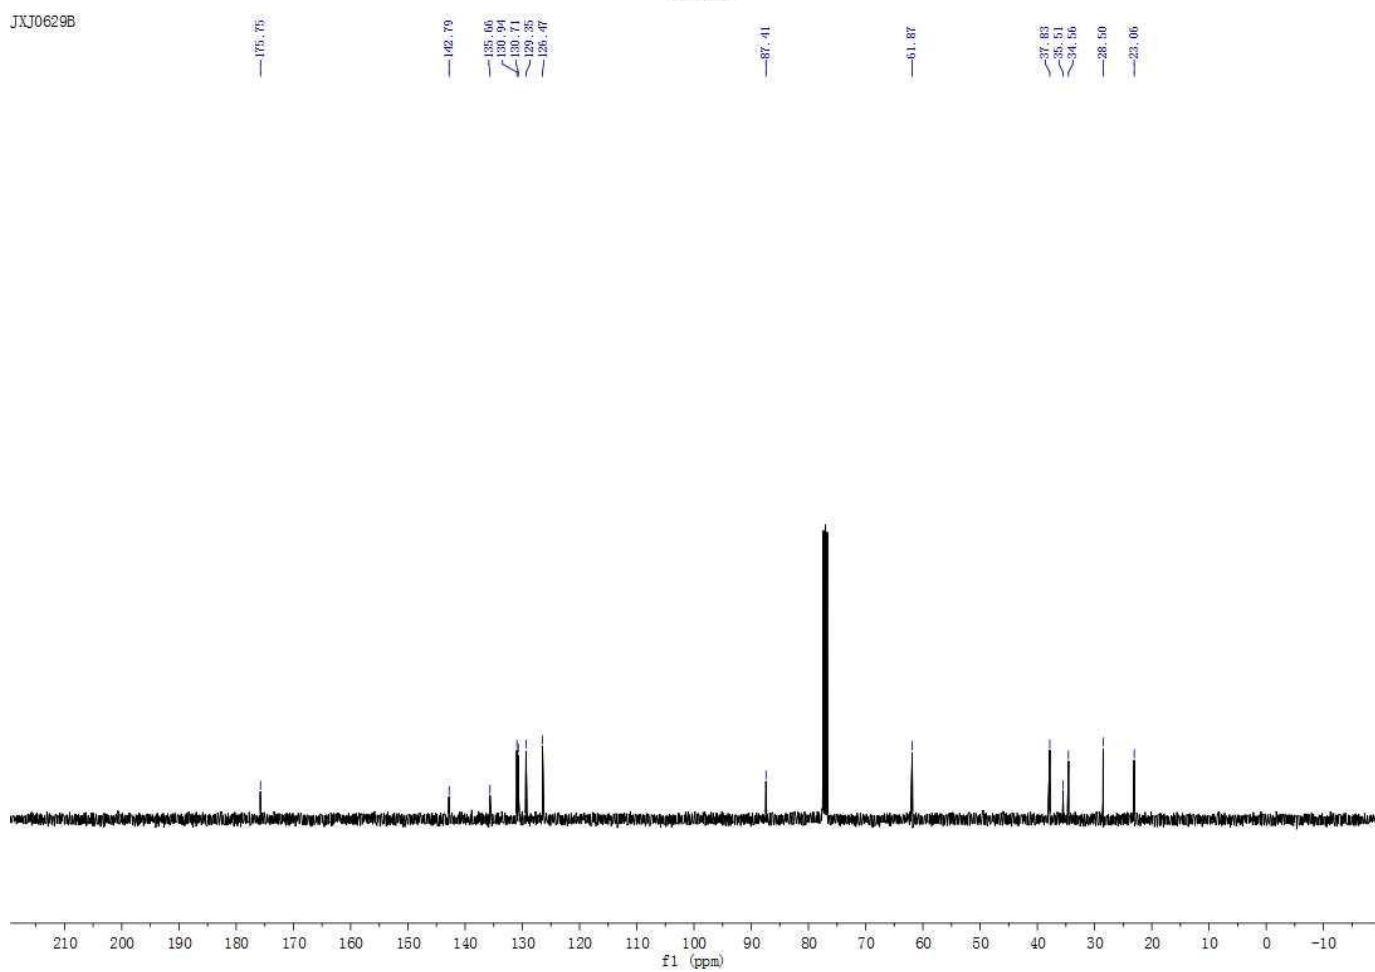

Supplement: Supplementary file 1 [file 17891264]
